# Supplementary material for: Phylogenetic relations and range history of jerboas of the Allactaginae subfamily (Dipodidae, Rodentia)
Source: PubMed Central journal article supplement (PMC8764116; doi:10.1038/s41598-022-04779-x), 2022-01-17
Supplement: 41598_2022_4779_MOESM1_ESM.pdf [file 41598_2022_4779_MOESM1_ESM.pdf]

Supplementary Information

**Phylogenetic relations and range history of jerboas of the Allactaginae  
subfamily (Dipodidae, Rodentia)**

Vladimir S. Lebedev,  
Georgy I. Shenbrot,  
Boris Krystufek,  
Ahmad Mahmoudi,  
Marina N. Melnikova,  
Evgeniya N. Solovyeva,  
Alexandra A. Lisenkova,  
Enkhbat Undrakhbayar,  
Konstantin A. Rogovin,  
Alexey V. Surov,  
Anna A. Bannikova

**Figure S1.** Distribution ranges of the recent species of Allactaginae as inferred from the occurrence records in MAXENT.

A) *Allactaga* and *Allactodipus*: 1, *Allactaga major* with subspecies *A. m. major* (**maj**), *A. m. spiculum* (**spi**), and *A. m. djetytsuensis* (**dje**); 2, *Allactaga severtzovi*; 3, *Allactodipus bobrinskii*; 4, zone of sympatry between *A. major* and *A. severtzovi*; 5, zone of sympatry between *A. bobrinskii* and *A. severtzovi*.

B) *Orientallactaga*: 1, *O. sibirica* with subspecies *O. s. sibirica* (**sib**), *O. s. ognevi* (**ogn**), *O. s. suschkini* (**sus**), *O. s. altorum* (**alt**), *O. s. dementiewi* (**dem**); 2, *O. balikunica*; 3, *O. bullata*; 4, zone of sympatry between *O. sibirica* and *O. bullata*; 5, zone of sympatry between *O. sibirica* and *O. balikunica*; 6, zone of sympatry between *O. sibirica*, *O. bullata*, and *O. balikunica*.

C) *Pygeretmus*: 1, *P. pumilio*; 2, *P. platyurus*; 3, *P. shitkovi*; 4, zone of sympatry between *P. pumilio* and *P. platyurus*; 5, zone of sympatry between *P. pumilio* and *P. shitkovi*; 6, zone of sympatry between *P. pumilio*, *P. platyurus*, and *P. shitkovi*.

D) *Scarturus elater* species group: 1, *S. elater* with subspecies *S. e. elater* (**ela**), *S. e. strandi* (**str**), *S. e. dzungariae* (**dzu**), *S. e. zaisanicus* (**zai**), and *S. e. caucasicus* (**cau**); 2, *S. heptneri*; 3, *S. indicus* with subspecies *S. i. indicus* (**ind**), *S. i. toussi* (**tou**), and *S. i. aralychensis* (**ara**); 4, zone of sympatry between *S. elater* and *S. heptneri*; 5, zone of sympatry between *S. indicus*, *S. elater*, and *S. heptneri*.

E) *Scarturus* (other than the *S. elater* species group): 1, *S. tetradactylus*; 2, *S. hotsoni*; 3, *S. vinogradovi*; 4, *S. caprimulga*; 5, *S. aulacotis*; 6, *S. euphraticus*; 7, *S. williamsi*.

All maps were obtained as raster maps from modeling using MAXENT 3.4.1 software and then generated as polygon maps using ArcGIS Desktop 10.8.1 software. MAXENT: available at [https://biodiversityinformatics.amnh.org/open\\_source/maxent/](https://biodiversityinformatics.amnh.org/open_source/maxent/) ArcGIS

Desktop: Copyright © 1995-2020 Esri



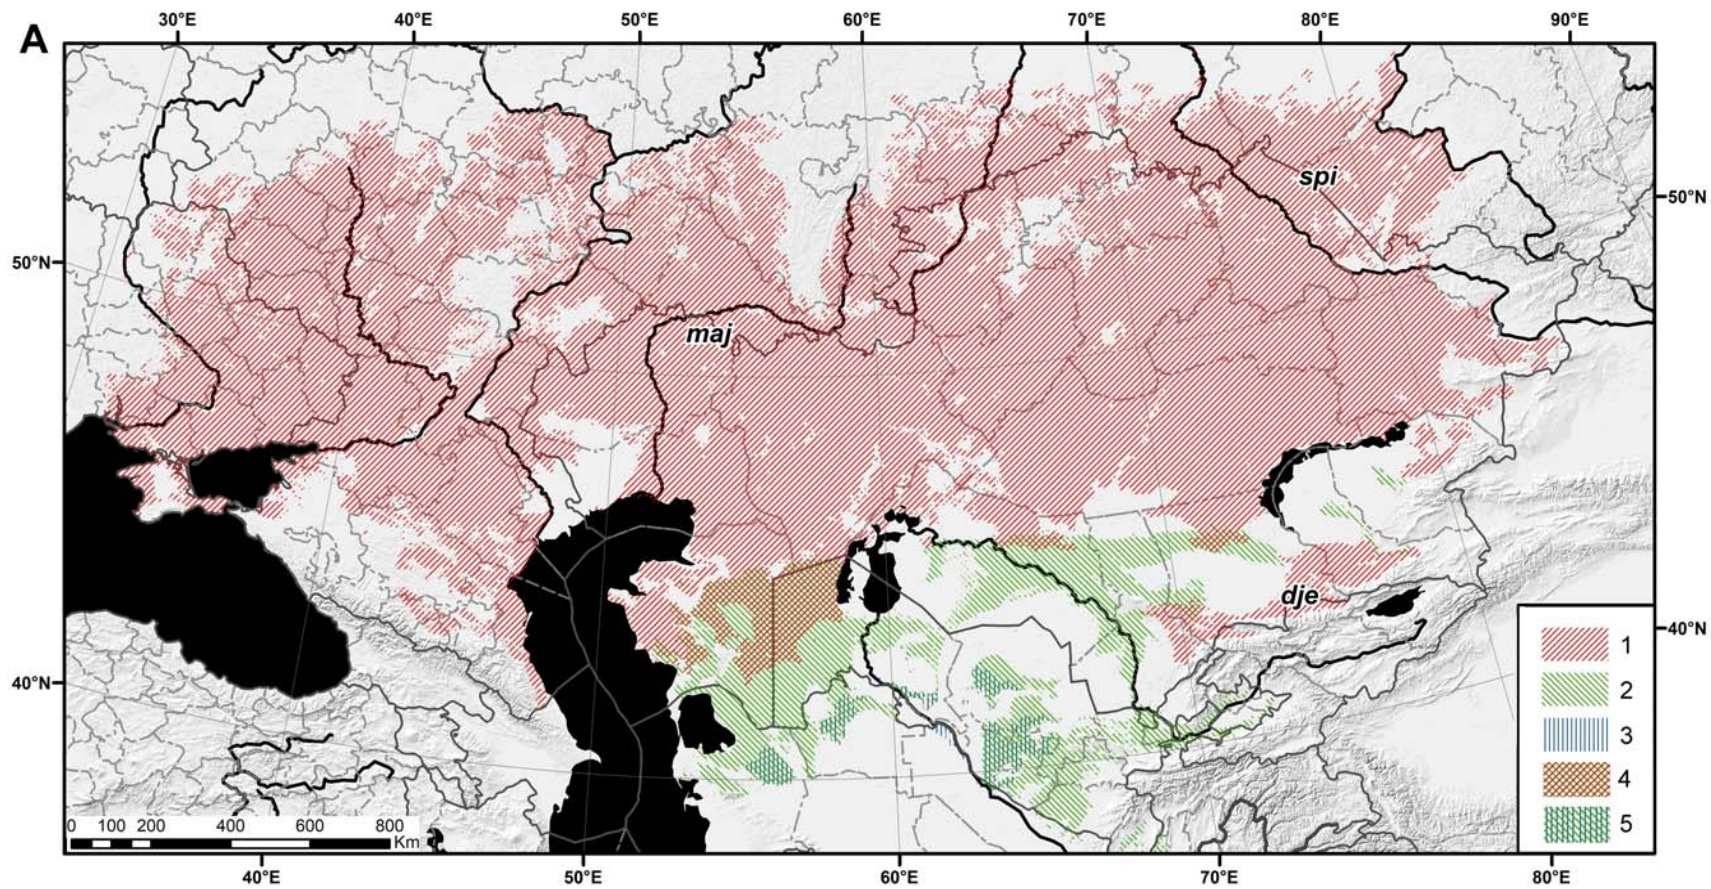



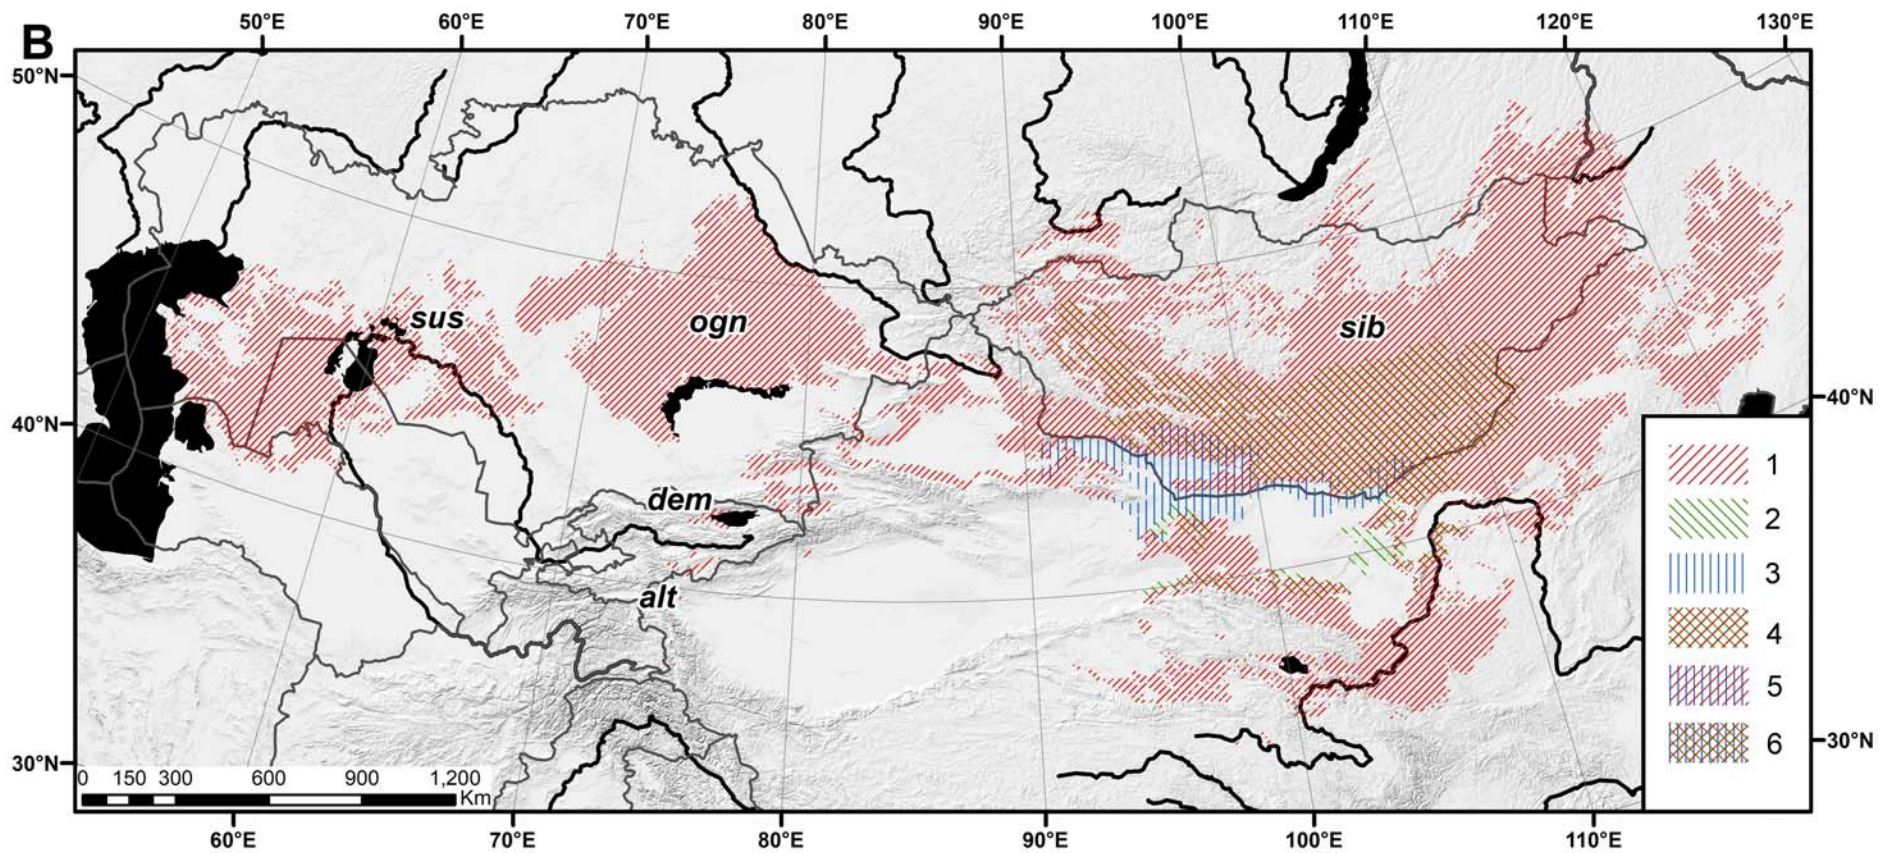

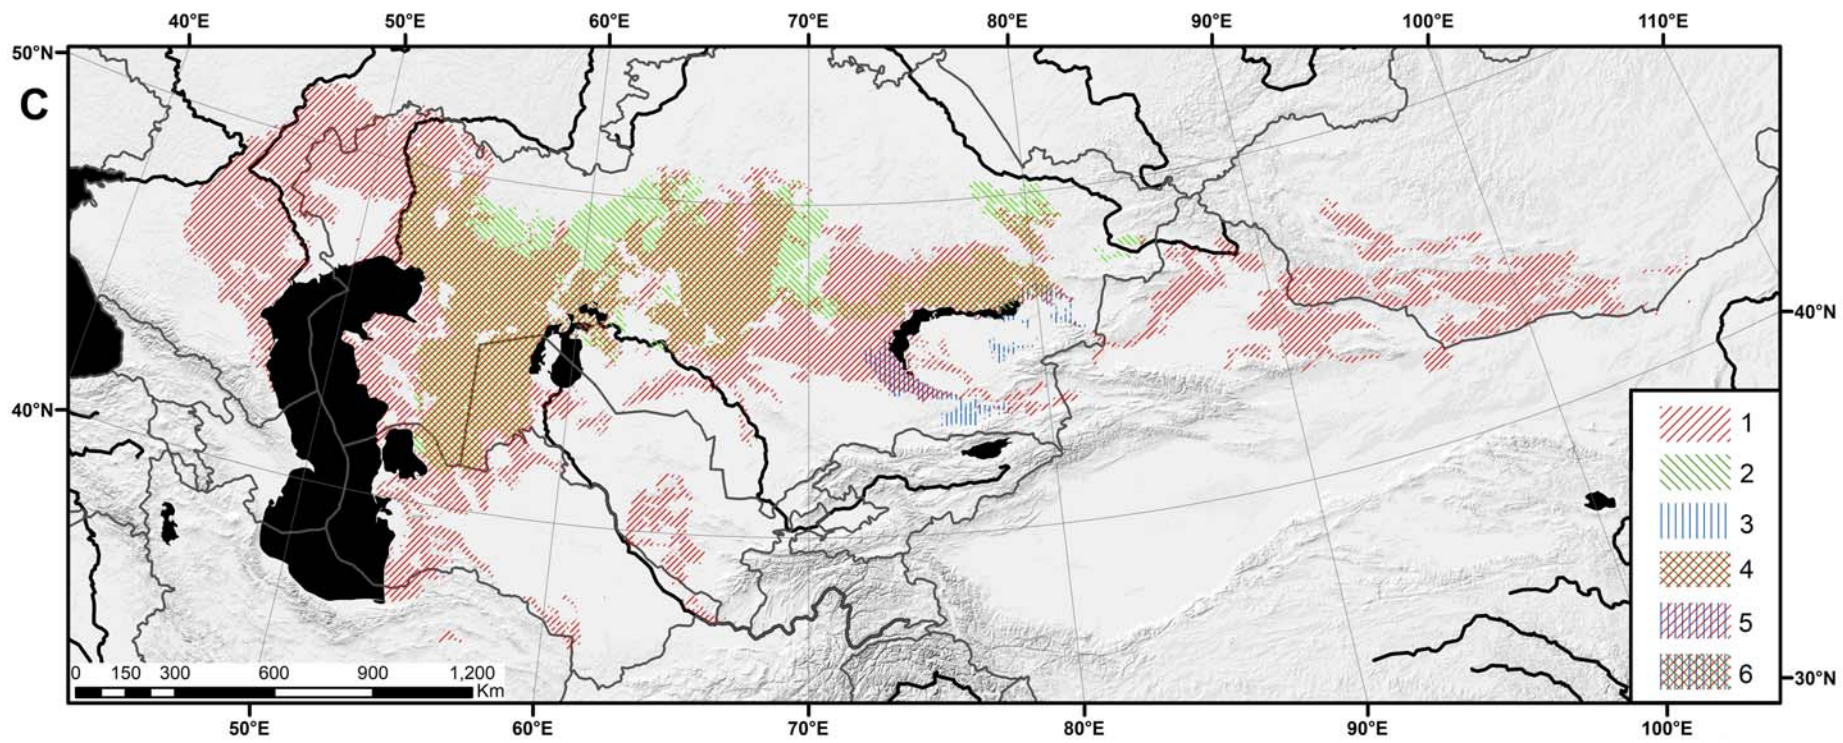



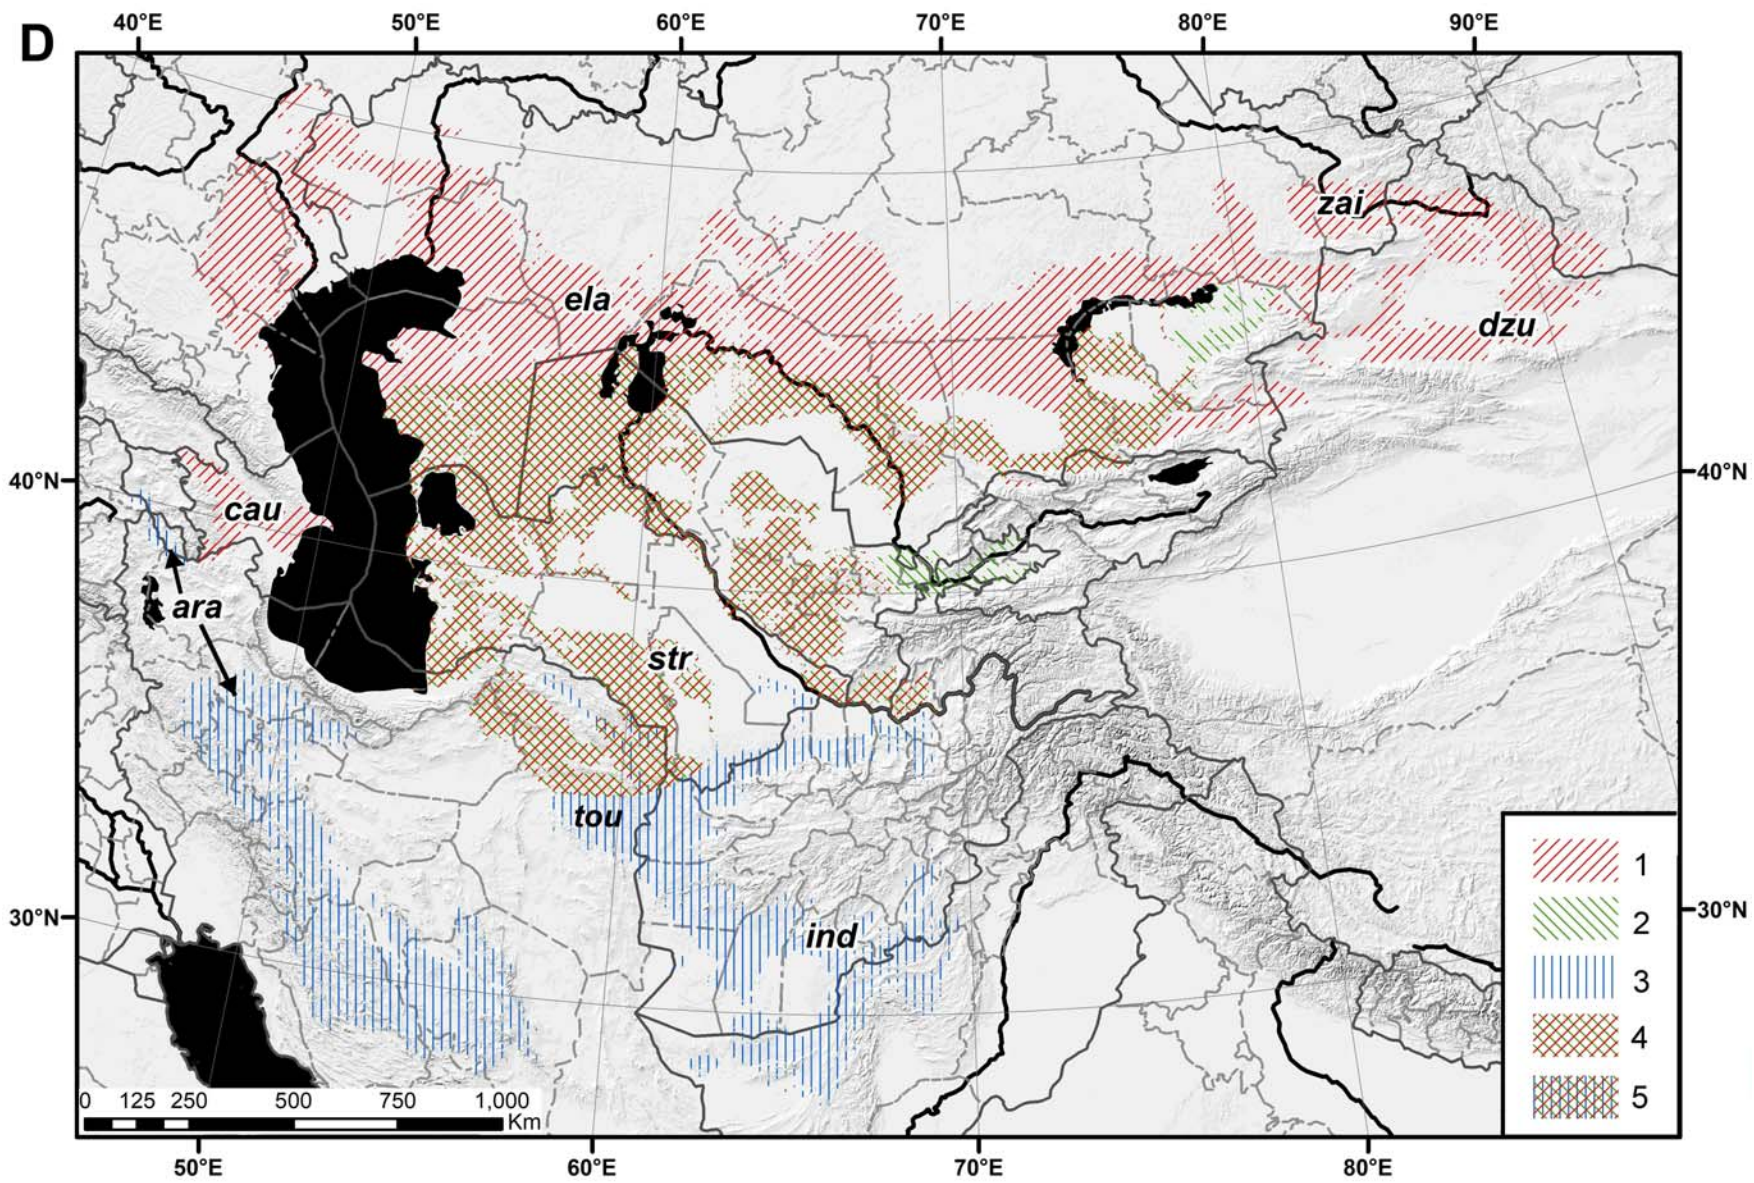



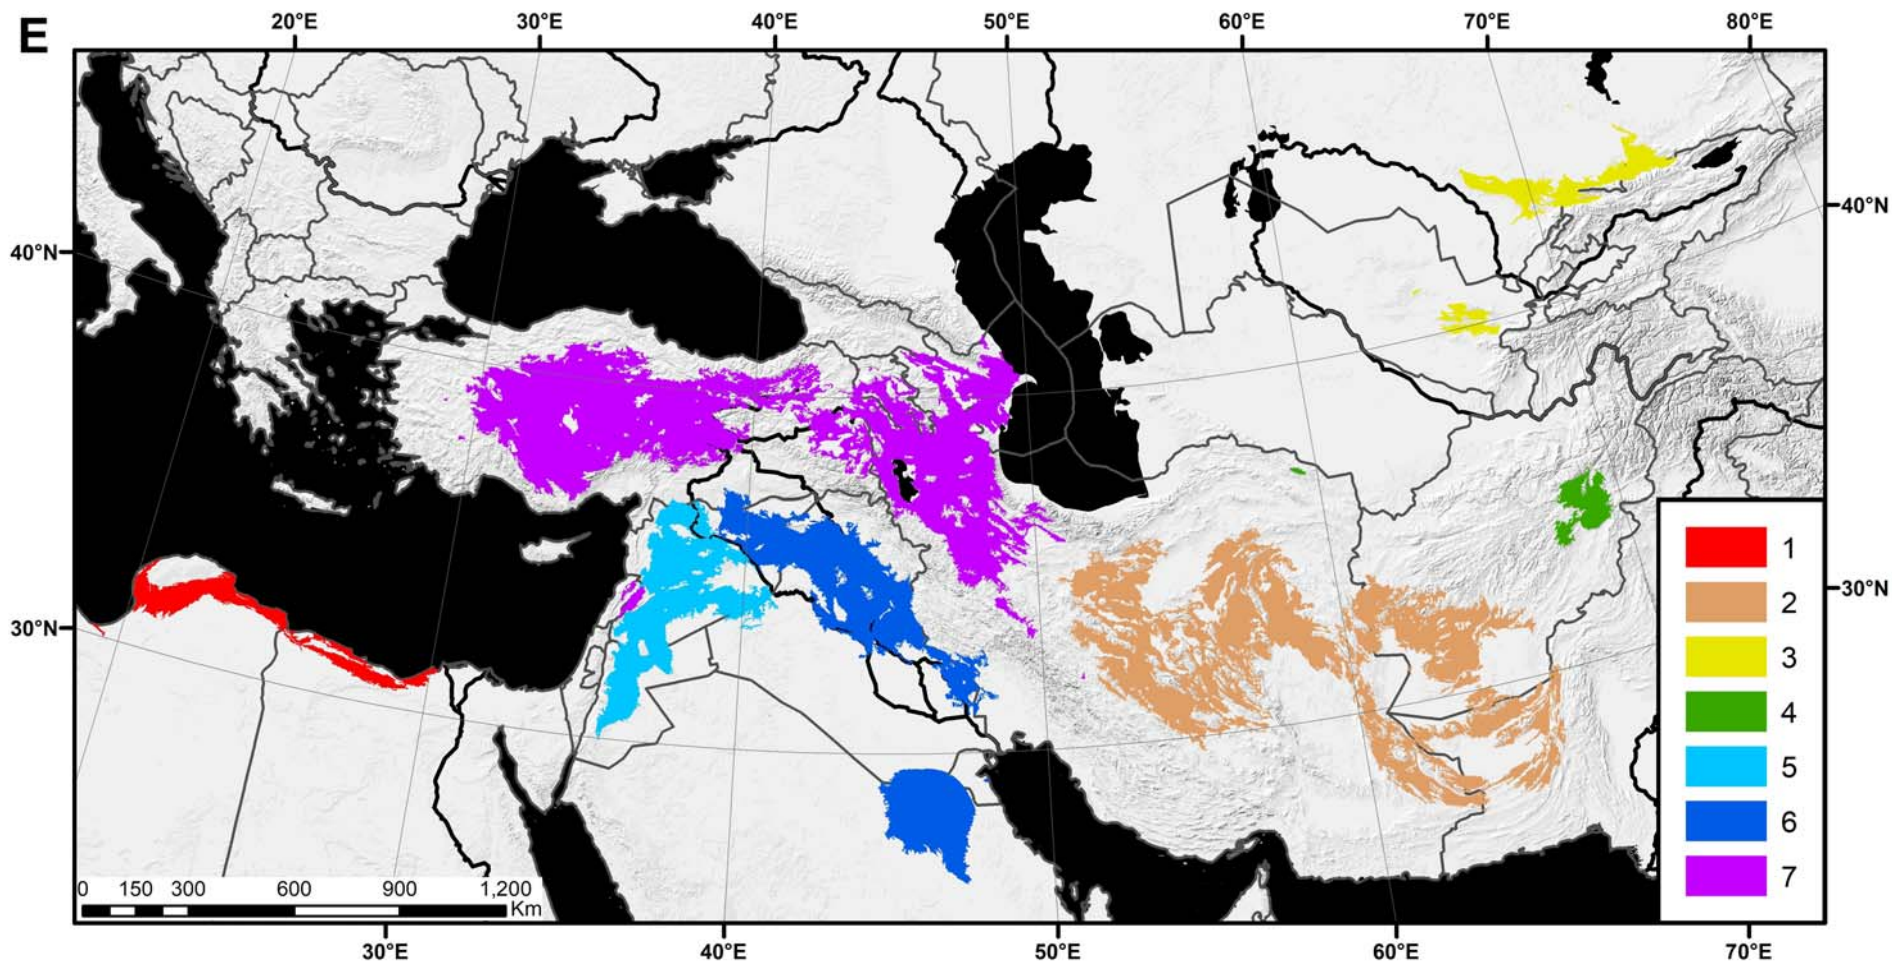

**Table S1. Characterization of the original material used in the study.**

| Species                     | specimen code<br>(Fig. 1–2, S1–S4<br>ref.) | museum catalog<br>number or tissue<br>code | Collecting locality                                                                             | Latitude | Longitude |
|-----------------------------|--------------------------------------------|--------------------------------------------|-------------------------------------------------------------------------------------------------|----------|-----------|
| <i>Allactaga major</i>      | Am Dag                                     | ZMMU<br>01/08_32                           | Russia, Dagestan,<br>Chakanny                                                                   | 43.792°  | 47.522°   |
|                             | Am 4                                       | ZMMU<br>S196092                            | Moscow Zoo                                                                                      |          |           |
|                             | Am K12-263                                 | Turgay K12-263                             | Kazakstan, Kara-<br>Turgay River valley,<br>Urpek-Karasu Rd.                                    | 50.175°  | 65.393°   |
|                             | Am K12-274                                 | Turgay K12-274                             |                                                                                                 |          |           |
|                             | Am K12-295                                 | Turgay K12-295                             |                                                                                                 |          |           |
|                             | Am K13-83                                  | ZMMU<br>S192601                            | Kazakhstan, East<br>Kazakhstan reg.,<br>Shakelmes, N shore of<br>Zaisan lake                    | 48.073°  | 84.130°   |
|                             | Am Kb16-23                                 | ZMMU<br>S197282                            | Kazakhstan,<br>Qaraghandy Reg., NW<br>shore of Lake<br>Balkhash, 30 km SW<br>from Gulshad vill. | 46.385°  | 74.017°   |
|                             | Am Kb16-56                                 | ZMMU<br>S197283                            | Kazakhstan, Jambyl<br>Reg., NE slope of<br>Chuili Mts.                                          | 44.438°  | 73.986°   |
|                             | Am Kb16-141                                | ZMMU<br>S197284                            | Kazakhstan, East<br>Kazakhstan reg., 3.5<br>km NE from<br>Baykoshkar vill.                      | 48.407°  | 78.810°   |
|                             | Am spiculum<br>143270*                     | ZMMU<br>S143270                            | Kazakhstan, East<br>Kazakhstan reg.,<br>Belagash (1987)                                         | 50.787°  | 80.866°   |
| <i>Allactaga severtzovi</i> | Asev Kb16-110                              | ZMMU<br>S197285                            | Kazakhstan, Almaty<br>Region, left bank of the<br>Karatal river, 10 km W<br>of Naimansuek vill. | 45.693°  | 77.221°   |

|                                     |               |                                                 |                                                                                      |         |          |
|-------------------------------------|---------------|-------------------------------------------------|--------------------------------------------------------------------------------------|---------|----------|
|                                     | Asev Uz17-40  | ZMMU<br>S198824                                 | Uzbekistan,<br>Karakalpakstan, 10 km<br>SE from Bozgul Hill                          | 42.989° | 61.319°  |
|                                     | Asev Uz17-88  | ZMMU<br>S198826                                 | Uzbekistan, Samarqand<br>Reg., W of Zaravshan<br>Mts., 3 km NE Jam vill.             | 39.453° | 66.439°  |
|                                     | Asev 2006     | uncatalogized<br>(presented by<br>A.V.Abramov)  | Uzbekistan, C<br>Kyzylkum,<br>Dzharakuduk vill., 40<br>km SW Mynbulak                | 42.115° | 62.629°  |
| <i>Allactodipus<br/>bobrinskii</i>  | Abob Turkm    | uncatalogized<br>(presented by<br>D.A.Kramerov) | Turkmenistan,<br>Chardzhou region, left<br>bank of Amur-Daryi, 6<br>km W Lebap vill. |         |          |
|                                     | Abob Uz17-21  | ZMMU<br>S198828                                 | Uzbekistan, Navoi<br>region, 23 km WNW<br>from Uchkuduk                              | 42.209° | 63.284°  |
|                                     | Abob Uz17-22  | ZMMU<br>S198829                                 |                                                                                      |         |          |
| <i>Orientallactaga<br/>sibirica</i> | Asib Bur01-22 | ZIN 86161                                       | Russia, Buriatia,<br>Kyakhtinsky district, 4-<br>5 km N of Kiran vill.               | 50.467° | 106.817° |
|                                     | Asib M18-114  | M18-114                                         | Mongolia, Erdenet<br>Tsaagan Nuur, 20 km S<br>of somon                               | 45.914° | 115.368° |
|                                     | Asib Kb16-03  | ZMMU<br>S197287                                 | Kazakhstan, Qaragandy<br>reg. Bektau Ata, N<br>slope                                 | 47.481° | 74.695°  |
|                                     | Asib Kb16-140 | ZMMU<br>S197291                                 | Kazakhstan, E<br>Kazakhstan reg., 4 km<br>from Baikoshkar                            | 48.407° | 78.810°  |
|                                     | Asib M10-185  | ZMMU<br>S187318                                 | Mongolia, Ubs aymag,<br>Achit Nuur SE shore                                          | 49.478° | 90.631°  |
|                                     | Asib M13-187  | ZMMU<br>S192231                                 | Mongolia, Ömnögovi<br>aymag, S Borzongiin<br>Gobi                                    | 42.232° | 105.413° |
|                                     | Asib M06-164  | ZMMU                                            | Mongolia, Khovd                                                                      | 47.567° | 93.469°  |

|                |                 |                                                                   |         |          |
|----------------|-----------------|-------------------------------------------------------------------|---------|----------|
|                | S181016         | aymag, S shore<br>Durgen-nur Lake                                 |         |          |
| Asib M12-68    | ZMMU<br>S190966 | Mongolia, Govi-Altai<br>aymag, Alag-Nuur                          | 45.191° | 94.593°  |
| Asib M14-64    | ZMMU<br>S193952 | Mongolia, Sukhbaatar<br>aymag, E of Darganga                      | 45.217° | 114.168° |
| Asib M14-86    | ZMMU<br>S193953 | Mongolia, Sukhbaatar<br>aymag, to the W of<br>Ongon               | 45.385° | 112.503° |
| Asib M14-144   | ZMMU<br>S193956 | Mongolia, Dorongovi<br>aymag, NW of Saralyn-<br>nuur              | 42.751° | 109.733° |
| Asib M14-171   | ZMMU<br>S193959 | Mongolia, Dorongovi<br>aymag, west of Tenger-<br>toirom           | 42.653° | 108.302° |
| Asib M13-216   | ZMMU<br>S192233 | Mongolia, Ömnögovi<br>aymag, Tavan-Aldyn<br>Khuduk                | 42.411° | 106.116° |
| Asib Xin12-As1 | As1             | China, Xinjiang,<br>Barkol, 25 km NW                              | 43.753° | 92.784°  |
| Asib M11-99    | ZMMU<br>S188951 | Mongolia, Govi-Altai<br>aymag, Gun-Tamga-<br>Bulag                | 45.259° | 93.654°  |
| Asib EK        | ZMMU<br>S182674 | Kazakhstan, E<br>Kazakhstan reg.,<br>Teristanbaly                 | 50.069° | 80.762°  |
| Asib 146874*   | ZMMU<br>S146874 | Kazakhstan, Almaty<br>Reg., 15 km NW<br>Druzhba (1988)            | 45.311° | 82.307°  |
| Asib 73068*    | ZMMU<br>S73068  | Kyrgyzstan, Issyk-Kul<br>Reg., Kurskoye (1955)                    | 42.618° | 76.965°  |
| Asib 69280*    | ZMMU<br>S69280  | Kazakhstan, Mangystau<br>Reg., N Usturt,<br>Karatyuley Sor (1958) | 44.804° | 55.672°  |
| Asib 145985*   | ZMMU<br>S145985 | Kazakhstan, Qyzylorda                                             | 46.797° | 61.616°  |



|                      |               |                 |                                                                     |         |          |
|----------------------|---------------|-----------------|---------------------------------------------------------------------|---------|----------|
|                      |               |                 | Reg., Aralsk (1988)                                                 |         |          |
|                      | Asib 73076*   | ZMMU<br>S73076  | Kyrgyzstan, Naryn<br>Reg., Atbashi (1957)                           | 41.188° | 75.868°  |
|                      | Asib 73081*   | ZMMU<br>S73081  | Kyrgyzstan, Naryn<br>Reg., Aksai (1957)                             | 40.877° | 76.188°  |
|                      | Asib 146877*  | ZMMU<br>S146877 | Kazakhstan, Almaty<br>Reg, Dzharkent distr.,<br>Tyshkan (1988)      | 44.320° | 80.084°  |
|                      | Asib 143272*  | ZMMU<br>S143272 | Kazakhstan, Qyzylorda<br>Reg., N Qyzylqum, 8<br>km N Irisbay (1987) | 43.981° | 63.323°  |
|                      | Asib 57308*   | ZMMU<br>S57308  | Kyrgyzstan, Issyk-Kul<br>Reg., Akulen (1954)                        | 42.353° | 76.180°  |
| <i>O. bullata</i>    | Abull M14-173 | ZMMU<br>S193945 | Mongolia, Dorongov<br>aymag, Tenger<br>ToiromW                      | 42.654° | 108.302° |
|                      | Abull M05-141 | ZMMU<br>S179572 | Mongolia, Dundgovi<br>aymag, Luus-somon 10<br>km W                  | 45.514° | 105.628° |
|                      | Abull M12-97  | ZMMU<br>S190960 | Mongolia, Govi-Altai<br>aymag, Haryn-Shang                          | 44.504° | 95.622°  |
|                      | Abull M12-98  | ZMMU<br>S190961 |                                                                     |         |          |
|                      | Abull M13-182 | ZMMU 44/13      | Mongolia, Ömnögovi<br>aymag, NE from<br>Hurmen                      | 43.367° | 104.301° |
|                      | Abull EG      | ZMMU<br>S188089 | Mongolia, Ömnögovi<br>aymag, Manlai–<br>Mandakh road                | 44.277° | 107.375° |
| <i>O. balikunica</i> | Abal M05-125  | Abal            | Mongolia,<br>Bayankhongor aymag,<br>Ekhiin-gol                      | 43.251° | 98.993°  |
|                      | Abal M13-77   | ZMMU<br>S192212 | Mongolia, GoviAltai<br>aymag, Dzamyn-<br>Bilgekh-bulag              | 43.099° | 97.488°  |
|                      | Abal M14-231  | ZMMU            | Mongolia, Ömnögovi                                                  | 42.483° | 105.254° |

|                                                 |                |                 |                                                                 |         |          |
|-------------------------------------------------|----------------|-----------------|-----------------------------------------------------------------|---------|----------|
|                                                 |                | S193939         | aymag, Borzongiin<br>Gobi, Gashuun-bulag                        |         |          |
|                                                 | Abal M13-147   | ZMMU<br>S192214 | Mongolia, Ömnögovi<br>aymag, Dzulganai                          | 43.583° | 100.066° |
|                                                 | Abal M11-226   | ZMMU<br>S188941 | Mongolia, Govi-Altai<br>aymag, Altai-somon,<br>15 km WNW        | 44.649° | 94.746°  |
|                                                 | Xin12-Ab1      | Ab1             | China, Xinjiang, Mori,<br>Hunlyushu                             | 44.560° | 91.341°  |
| <i>Pygeretmus<br/>(Alactagulus)<br/>pumilio</i> | Ppum K12-68    | ZMMU<br>S190928 | Kazakhstan, East<br>Kazakhstan Reg.,<br>Shakelmies              | 48.070° | 84.131°  |
|                                                 | Ppum Uz17-51   | ZMMU<br>S198859 | Uzbekistan, Republic<br>of Karakalpakstan,                      | 42.913° | 61.332°  |
|                                                 | Ppum Uz17-54   | ZMMU<br>S198862 | Delta of the<br>Ahchadarya dry river                            |         |          |
|                                                 | Ppum M06-153   | ZMMU<br>S181007 | Mongolia, GoviAltai<br>aymag, W shore of the<br>Beger-Nuur lake | 45.883° | 96.880°  |
|                                                 | Ppum M11-100   | ZMMU<br>S189185 | Mongolia, GoviAltai<br>aymag, Gun-Tamga-<br>Bulag               | 45.259° | 93.654°  |
|                                                 | Ppum K12-245   | Turgay K12-245  | Kazakstan, Kara-<br>Turgay River valley,                        | 50.175° | 65.393°  |
|                                                 | Ppum K12-251   | Turgay K12-251  | Urpek-Karasu Rd.                                                |         |          |
|                                                 | Ppum K12-261   | Turgay K12-261  |                                                                 |         |          |
|                                                 | Ppum K12-262   | Turgay K12-262  |                                                                 |         |          |
|                                                 | Ppum K12-204   | Turgay K12-204  |                                                                 |         |          |
|                                                 | Ppum Xin12-Pp3 | Pp3             | China, Xinjiang, Hami,<br>30 km NNE                             | 43.097° | 93.598°  |
| <i>Pygeretmus<br/>platyurus</i>                 | Ppla K12-297   | Turgay K12-297  | Kazakstan, Turgay                                               |         |          |
|                                                 | Ppla K12-302   | Turgay K12-302  |                                                                 |         |          |
| <i>Pygeretmus shitkovi</i>                      | Pshi Kb16-122  | ZMMU<br>S197354 | Kazakhstan, Almaty                                              | 46.339° | 81.314°  |

|                                    |                |                                   |                                                                                                 |         |         |
|------------------------------------|----------------|-----------------------------------|-------------------------------------------------------------------------------------------------|---------|---------|
|                                    | Pshi Kb16-123  | ZMMU<br>S197355                   | Reg., Koshkarakol<br>Lake                                                                       |         |         |
|                                    | Pshi Kb16-124  | ZMMU<br>S197356                   |                                                                                                 |         |         |
|                                    | Pshi Zoo       | ZMMU<br>S196141                   | Kazakhstan, E of<br>Almaty, near Shilik                                                         |         |         |
| <i>Scarturus hotsoni</i>           | Ahot 34SP      | 34SP-AM                           | Iran, Semnan, Parvar,<br>Damghan                                                                | 36.178° | 54.323° |
| <i>Scarturus e. elater</i>         | Aela Dag30     | uncatalogized<br>(coll. L.Khlyap) | Russia, Dagestan,<br>Chakanny, Kizlyar<br>district                                              | 43.792° | 47.522° |
|                                    | Aela Kb16-26   | ZMMU<br>S197245                   | Kazakhstan,<br>Qaraghandy Reg., NW<br>shore of Lake<br>Balkhash, 30 km SW<br>from Gulshad vill. | 46.385° | 74.017° |
| <i>Scarturus e.<br/>caucasicus</i> | Aela G17-1     | 1G                                | Georgia, Kakhet'i Dalis<br>Mta Reservoir, Iori<br>River v.                                      | 41.282° | 45.849° |
| <i>Scarturus e. strandi</i>        | Aest Uz17-19   | ZMMU<br>S198800                   | Uzbekistan, Navoi<br>reg., 23 km NW<br>Zarafshan, Zhamankum<br>Sands                            | 41.737° | 64.024° |
| <i>Scarturus e. strandi</i>        | Aest Uz17-82   | ZMMU<br>S198817                   | Uzbekistan, Bukhara<br>reg., Bukhara Hazard<br>cattery                                          | 39.588° | 64.660° |
|                                    | Aest 04SK      | 04SK-AM                           | Iran, Razavi Khorasan,<br>Khaf                                                                  | 34.572° | 60.157° |
|                                    | Aest 05SK      | 05SK-AM                           |                                                                                                 |         |         |
|                                    | Aest 07SK      | 07SK-AM                           | Iran, South Khorasan,<br>Ghaen                                                                  | 33.724° | 59.239° |
|                                    | Aest 08SK      | 08SK-AM                           |                                                                                                 |         |         |
| <i>Scarturus e.<br/>dzungariae</i> | Aedz Xin12-Ae1 | Ae1                               | China, Xinjiang,<br>Musowan Field Station,<br>1.5 km NE                                         | 45.126° | 86.028° |
|                                    | Aedz M15-131   | ZMMU<br>S196374                   | Mongolia, Khovd<br>aimak, Bayan-Inder, 37<br>km SW from Uench                                   | 45.812° | 91.696° |

|                                  |              |                 |                                                        |         |         |
|----------------------------------|--------------|-----------------|--------------------------------------------------------|---------|---------|
| <i>Scarturus e. zaisanicus</i>   | Aeza K13-24  | ZMMU<br>S192593 | Kazakhstan, E<br>Kazakhstan reg., W of<br>Tugyl        | 47.771° | 84.166° |
| <i>Scarturus indicus toussi</i>  | Aind 33SP    | 33SP-AM         | Iran, Semnan, Parvar                                   |         |         |
|                                  | Aind 35EN    | 35EN-AM         | Iran, Semnan, Parvar,<br>Damghan                       | 36.178° | 54.323° |
|                                  | Aind 06SK    | 06SK-AM         | Iran, Razavi Khorasan,<br>Zaveh                        | 35.269° | 59.459° |
| <i>Scarturus i. aralychensis</i> | Aara Arm     | ZMMU<br>S197177 | Armenia, between<br>Artashat and Vedi                  | 39.931° | 44.644° |
|                                  | Aara 41HA    | 41HA-AM         | Iran, Hamadan-<br>Kabudar Ahang,<br>Akanlu             | 35.601° | 48.189° |
|                                  | Aara 09HK    | 09HK-AM         |                                                        |         |         |
| <i>Scarturus heptneri</i>        | Ahep K15-7   | ZMMU<br>S196178 | Kazakhstan, Almaty<br>region, S Balkhash,<br>Bozbor    | 45.257° | 75.425° |
|                                  | Ahep Uz17-75 | ZMMU<br>S198813 | Uzbekistan, Bukhara<br>region, S from<br>Kuldzhuktau   | 40.751° | 63.829° |
|                                  | Ahep Uz17-80 | ZMMU<br>S198815 | Uzbekistan, Bukhara<br>reg., Bukhara Hazard<br>cattery | 39.588° | 64.660° |
|                                  | Ahep 39NK    | 39NK-AM         | Iran, Razavi Khorasan,<br>Sarakhs                      | 36.538° | 61.058° |
|                                  | Ahep 01RK    | 01RK-AM         | Iran, Razavi Khorasan,<br>Shurak Maleki                | 36.069° | 60.228° |
|                                  | Ahep 02RK    | 02RK-AM         |                                                        |         |         |
|                                  | Ahep 03RK    | 03RK-AM         |                                                        |         |         |
|                                  |              |                 |                                                        |         |         |
| <i>Scarturus euphraticus</i>     | Aeup BK5     | BK5             | Turkey, Sanliurfa,<br>Harran                           | 36.836° | 39.199° |
|                                  | Aeup BK6     | BK6             |                                                        |         |         |
| <i>Scarturus aulacotis</i>       | Aaul BK23    | BK23            | Syria, Karyatien, Homs                                 | 34.246° | 37.230° |
|                                  | Aaul BK28    | BK28            |                                                        |         |         |
| <i>Scarturus williamsi</i>       | Awil BK1     | BK1             | Turkey, Konya,<br>Cihanbeyli                           | 38.551° | 33.181° |

|                                                                   |              |                    |                                                         |         |          |
|-------------------------------------------------------------------|--------------|--------------------|---------------------------------------------------------|---------|----------|
|                                                                   | Awil BK3     | BK3                | Turkey, Kirikkale,<br>Keskin                            | 39.685° | 33.629°  |
|                                                                   | Awil BK29    | 115/11BK           | Lebanon, Beqaa, Aarsal                                  | 34.171° | 36.417°  |
|                                                                   | Awil 10EA    | 10EA               | East Azerbaijan, Ahar                                   | 38.469° | 47.040°  |
|                                                                   | Awil 11EA    | 11EA               |                                                         |         |          |
| <i>Scarturus caprimulga</i>                                       | Acap BK12*   | ZFMK 93.639        | Afganistan, Ghazni,<br>Dashte Nawar                     | 33.686° | 67.841°  |
| <i>Scarturus</i> sp. Kopet<br>Dag (S. aff.<br><i>caprimulga</i> ) | Asp IR1      | ZMFUM<br>5028/5029 | Iran, Khorasan-e<br>Razavi, Kopet Dag                   | 36.935° | 59.520°  |
| <i>Scarturus vinogradovi</i>                                      | Avin 148087* | ZMMU<br>S148087    | Kyrgyzstan, Talas<br>district, Kirovskoye<br>(1989)     | 42.643° | 71.582°  |
| <i>Cardiocranius paradoxus</i>                                    | M10-137      | ZMMU<br>S187344    | Mongolia, Govi-Altai<br>aymag, Buutsagaan<br>~50km SW   | 45.951° | 98.074°  |
| <i>Salpingotus kozlovi</i>                                        | M13-28       | ZMMU<br>S183051    | Mongolia, Govi-Altai<br>aymag, Barun-Shargyn-<br>Gol    | 43.435° | 97.224°  |
| <i>Euchoreutes naso</i>                                           | M05-129      | ZMMU<br>S179636    | Mongolia,<br>Bayankhongor aymag,<br>Ekhiin-gol 47 km NE | 43.466° | 99.483°  |
| <i>Dipus sagitta</i>                                              | M18-182      | M18-182            | Mongolia, Burdene-<br>Bulag, 120 km from<br>Saishand    | 44.217° | 110.933° |
|                                                                   | M17-13       | ZMMU<br>S198673    | Mongolia, Ubs aymag,<br>Altynels                        | 49.783° | 95.383°  |

ZMMU – Zoological Museum of Moscow State University, Moscow

ZFMK – Zoological Research Museum Alexander Koenig Leibniz Institute for Animal Biodiversity

Asterisks mark the specimens which DNA was extracted from dried skins or bones of museum collection

**Table S2.** Sequences retrieved from GeneBank.

| species                               | Tissue code/voucher | Genes/GB AccNo                                                                                                            | reference |
|---------------------------------------|---------------------|---------------------------------------------------------------------------------------------------------------------------|-----------|
| <b>Nuclear genes</b>                  |                     |                                                                                                                           |           |
| <i>Allactaga major</i>                | Am Dag              | <b>IRBP:</b> JQ347931<br><b>GHR:</b> JQ347911<br><b>BRCA1:</b> JQ347889<br><b>RAG1:</b> JQ347867                          | 1         |
| <i>Allacatadipus<br/>bobrinskii</i>   | Abob Turkm          | <b>IRBP:</b> JQ347934<br><b>GHR:</b> JQ347914<br><b>BRCA1:</b> JQ347892<br><b>RAG1:</b> JQ347870<br><b>A2AB:</b> JF938721 | 1<br>2    |
| <i>Orientallactaga<br/>balikunica</i> | Abal 05-125         | <b>IRBP:</b> KM397136<br><b>GHR:</b> KM397227<br><b>BRCA1:</b> KM397274<br><b>RAG1:</b> KM397274                          | 3         |
| <i>O. bullata</i>                     | Abull M05-141       | <b>IRBP:</b> JQ347929<br><b>GHR:</b> JQ347909<br><b>BRCA1:</b> JQ347887<br><b>RAG1:</b> JQ347865                          | 1         |
| <i>O. sibirica</i>                    | Asib M06-164        | <b>IRBP:</b> JQ347928<br><b>GHR:</b> JQ347908<br><b>BRCA1:</b> JQ347886<br><b>RAG1:</b> JQ347864                          | 1         |
| <i>Scarturus e. elater</i>            | Aela Dag30          | <b>IRBP:</b> JQ347933<br><b>GHR:</b> JQ347913<br><b>BRCA1:</b> JQ347891<br><b>RAG1:</b> JQ347869                          | 1         |
| <i>S. e. caucasicus</i>               | Aela G17-1          | <b>IRBP:</b> MH979213<br><b>BRCA1:</b> MH991700                                                                           | 4         |
| <i>S. vinogradovi</i>                 | Avin                | <b>IRBP:</b> MH979217                                                                                                     | 4         |
| <i>S. i. aralychensis</i>             | Aara Arm            | <b>IRBP:</b> MH979161<br><b>BRCA1:</b> MH991640                                                                           |           |
| <i>S. e. strandi</i>                  | Aest Uz17-19        | <b>IRBP:</b> MH979197<br><b>BRCA1:</b> MH991683                                                                           |           |
|                                       | Aest Uz17-82        | <b>IRBP:</b> MH979211<br><b>BRCA1:</b> MH991697                                                                           |           |
| <i>S. e. dzungariae</i>               | Aedz Xin12-1        | <b>IRBP:</b> MH979164<br><b>BRCA1:</b> MH991644                                                                           |           |
| <i>S. heptneri</i>                    | Ahep K15-7          | <b>IRBP:</b> MH979165<br><b>BRCA1:</b> MH991651                                                                           |           |
|                                       | Ahep Uz17-75        | <b>BRCA1:</b> MH991694<br><b>IRBP:</b> MH979208                                                                           |           |
|                                       | Ahep Uz17-80        | <b>BRCA1:</b> MH991695                                                                                                    |           |

|                         |         |                                                                                                                                                                                                                                                        |                                            |
|-------------------------|---------|--------------------------------------------------------------------------------------------------------------------------------------------------------------------------------------------------------------------------------------------------------|--------------------------------------------|
|                         |         | <b>IRBP:</b> MH979209                                                                                                                                                                                                                                  |                                            |
| <i>S. hotsoni</i>       | Ahot GB | <b>A2AB:</b> JF938728<br><b>ATP7a:</b> JF938754<br><b>BRCAl:</b> JF938780<br><b>CNRI:</b> JF938807<br><b>CREM:</b> JF938830<br><b>GHR:</b> JF938857<br><b>IRBP:</b> JF938883<br><b>RAG2:</b> JF938906<br><b>vWF:</b> JF938705                          | 2                                          |
| <i>S. tetradactylus</i> |         | <b>A2AB:</b> KT164755<br><b>IRBP:</b> KT164758<br><b>GHR:</b> KT164757<br><b>BRCAl:</b> KT164760<br><b>vWF:</b> KT164761<br><b>LCAT:</b> KT164759<br><b>ATP7a:</b> KT164762<br><b>CNRI:</b> KT164756<br><b>CREM:</b> KT164763<br><b>RAG2:</b> KT164764 | 5                                          |
| <i>Dipus sagitta</i>    |         | <b>BRCAl:</b> JQ347896<br><b>RAG1:</b> JQ347874                                                                                                                                                                                                        | 1                                          |
|                         |         | <b>A2AB:</b> JF938720<br><b>ATP7a:</b> JF938746<br><b>CREM:</b> JF938822                                                                                                                                                                               | 2                                          |
|                         |         | <b>IRBP:</b> AJ427232<br><b>LCAT:</b> AJ275532                                                                                                                                                                                                         | 6                                          |
|                         |         | <b>GHR:</b> AM407908                                                                                                                                                                                                                                   | 7                                          |
|                         |         | <b>CNRI:</b> AY303184<br><b>RAG2:</b> AY303203                                                                                                                                                                                                         | 8                                          |
| <i>Jaculus jaculus</i>  |         | <b>GHR:</b> XM_004652494<br><b>RAG1:</b> XM_004651251<br><b>ACP5:</b> NW_004504415<br><b>c-myc:</b> NW_004504331<br><b>LCAT:</b> NW_004504357<br><b>ATP7a:</b> XM_004666975                                                                            | whole genome shotgun<br>sequence JacJac1.0 |
|                         |         | <b>IRBP:</b> AM407907                                                                                                                                                                                                                                  | 7                                          |
|                         |         | <b>BRCAl:</b> JN414198<br><b>BRCAl2:</b> JN414342<br><b>CREM:</b> JN633508<br><b>ApoB:</b> JN414058                                                                                                                                                    | 9                                          |

|                                |               |                         |    |
|--------------------------------|---------------|-------------------------|----|
|                                |               | <b>A2AB</b> :JF938725   | 2  |
|                                |               | <b>CNRI</b> : FM162121  | 10 |
|                                |               | <b>RAG2</b> : FM162089  |    |
|                                |               | <b>vWF</b> : AJ224665   | 11 |
| <i>Cardiocranius paradoxus</i> |               | <b>IRBP</b> : JQ347925  | 1  |
|                                |               | <b>GHR</b> : JQ347905   |    |
|                                |               | <b>BRCA1</b> : JQ347883 |    |
|                                |               | <b>RAG1</b> : JQ347861  |    |
|                                |               | <b>A2AB</b> : JF938732  | 2  |
|                                |               | <b>ATP7</b> : JF938758  |    |
|                                |               | <b>CNRI</b> : JF938811  |    |
|                                |               | <b>CREM</b> : JF938834  |    |
|                                |               | <b>vWF</b> : JF938709   |    |
| <i>Salpingotus kozlovi</i>     |               | <b>IRBP</b> : JQ347924  | 3  |
|                                |               | <b>GHR</b> : JQ347904   |    |
|                                |               | <b>BRCA1</b> : JQ347882 |    |
|                                |               | <b>RAG1</b> : JQ347860  |    |
|                                |               | <b>A2AB</b> : JF938729  | 2  |
|                                |               | <b>ATP7</b> : JF938755  |    |
|                                |               | <b>CNRI</b> : JF938808  |    |
|                                |               | <b>CREM</b> : JF938831  |    |
|                                |               | <b>vWF</b> : JF938706   |    |
| <i>Euchoreutes naso</i>        |               | <b>IRBP</b> : JQ347927  | 1  |
|                                |               | <b>GHR</b> : JQ347907   |    |
|                                |               | <b>BRCA1</b> : JQ347885 |    |
|                                |               | <b>RAG1</b> : JQ347863  |    |
|                                |               | <b>A2AB</b> : JF938724  | 2  |
|                                |               | <b>ATP7</b> : JF938750  |    |
|                                |               | <b>CNRI</b> : JF938803  |    |
|                                |               | <b>CREM</b> : JF938826  |    |
|                                |               | <b>RAG2</b> : JF938902  |    |
|                                |               | <b>vWF</b> : JF938702   |    |
| <b>cytb</b>                    |               |                         |    |
| <i>Allactaga major</i>         | Am Dag        | KM397178                | 3  |
|                                | Am Kb16-23    | MH973322                | 4  |
| <i>Allactaga severtzovi</i>    | Asev Kb16-111 | MH973323                | 4  |
| <i>O. balikunica</i>           | YW15014       | MN979455                | 12 |
|                                | XJ08106       | MN979456                |    |
|                                | XJ08107       | MN979457                |    |
|                                | Abal M05-125  | KM397180                | 3  |
| <i>O. bullata</i>              | Abull M05-141 | KM397179                | 3  |
| <i>Allactodipus</i>            | Abob Turkm    | KM397181                | 3  |



|                            |                                                                                                                                                                                                                                                                                                                                                                                                                                                                                                                                                                                                                                                                                                                                                                                                                   |                                                                                                                                                                                                                                                                                                                                                                                                                                                                                                                                                                                                                                                                                                                                                                                                                                                                                                           |    |
|----------------------------|-------------------------------------------------------------------------------------------------------------------------------------------------------------------------------------------------------------------------------------------------------------------------------------------------------------------------------------------------------------------------------------------------------------------------------------------------------------------------------------------------------------------------------------------------------------------------------------------------------------------------------------------------------------------------------------------------------------------------------------------------------------------------------------------------------------------|-----------------------------------------------------------------------------------------------------------------------------------------------------------------------------------------------------------------------------------------------------------------------------------------------------------------------------------------------------------------------------------------------------------------------------------------------------------------------------------------------------------------------------------------------------------------------------------------------------------------------------------------------------------------------------------------------------------------------------------------------------------------------------------------------------------------------------------------------------------------------------------------------------------|----|
| <i>bobrinskii</i>          |                                                                                                                                                                                                                                                                                                                                                                                                                                                                                                                                                                                                                                                                                                                                                                                                                   |                                                                                                                                                                                                                                                                                                                                                                                                                                                                                                                                                                                                                                                                                                                                                                                                                                                                                                           |    |
| <i>Pygeretmus pumilio</i>  | Ppum Kb16-5AR                                                                                                                                                                                                                                                                                                                                                                                                                                                                                                                                                                                                                                                                                                                                                                                                     | MH973415                                                                                                                                                                                                                                                                                                                                                                                                                                                                                                                                                                                                                                                                                                                                                                                                                                                                                                  | 4  |
| <i>Pygeretmus shitkovi</i> | Pzh Kb16-124                                                                                                                                                                                                                                                                                                                                                                                                                                                                                                                                                                                                                                                                                                                                                                                                      | MH973414                                                                                                                                                                                                                                                                                                                                                                                                                                                                                                                                                                                                                                                                                                                                                                                                                                                                                                  | 4  |
| <i>O. sibirica</i>         | QZ0005                                                                                                                                                                                                                                                                                                                                                                                                                                                                                                                                                                                                                                                                                                                                                                                                            | HQ585979                                                                                                                                                                                                                                                                                                                                                                                                                                                                                                                                                                                                                                                                                                                                                                                                                                                                                                  | 2  |
|                            | H1– H9                                                                                                                                                                                                                                                                                                                                                                                                                                                                                                                                                                                                                                                                                                                                                                                                            | JX891482 –JX891490                                                                                                                                                                                                                                                                                                                                                                                                                                                                                                                                                                                                                                                                                                                                                                                                                                                                                        | 13 |
|                            | XJ0309SD03                                                                                                                                                                                                                                                                                                                                                                                                                                                                                                                                                                                                                                                                                                                                                                                                        | KM397214                                                                                                                                                                                                                                                                                                                                                                                                                                                                                                                                                                                                                                                                                                                                                                                                                                                                                                  | 3  |
|                            | CGGZ02, CGGZ03,<br>CGJY01–CGJY10,<br>CJTJ01–CJTJ06, CNAY01,<br>CNAZ04–CNAZ08,<br>CNBLY01–CNBLY07,<br>CNCTS01–CNCTS04,<br>CNDM01–CNDM11,<br>CNEL01–CNEL03,<br>CNET01–CNET03,<br>CNHH01, CNHLX01,<br>CNKL01–CNKL05,<br>CNWC01, CNWC02,<br>CNWH01–CNWH05,<br>CNWS01–CNWS22,<br>CNWZ01, CNXLDW01,<br>CNXLW01–CNXLW08,<br>CNXYC01, CNZL01,<br>CQDL2–CQDL41,<br>CQDLC01–CQDLC06,<br>CQGQ01–CQGQ04,<br>CQGY01–CQGY04,<br>CQWD01, CQWD02,<br>CXAL01, CXBE01, CXBE02,<br>CXBL01–CXBL11,<br>CXBT01–CXBT14;<br>CXCMMJ01 CXCMMJ07,<br>CXCML01–CXCML13,<br>CXCQ01; CNAY01,<br>CXFHDN01–CXFHDN07,<br>–CXFHS01– CXFHS03,<br>CXFJ01, CXFJ02;<br>CXFYB01–CXFYB13,<br>CXHBH01–CXHBH11,<br>CXHYW01, CXHYW01;<br>CXJMN01–CXJMN06,<br>CXKL01–CXKL03,<br>CXQH01–CXQH04,<br>CXTEM01–CXTEM06,<br>CXTHF18401–CXTHF18406,<br>CXWE01–CXWE03, | MN979460–MN979461,<br>MN979462–MN979471,<br>MN979472–MN979477,<br>MN979479MN979483,<br>MN979484–MN979490,<br>MN979491–MN979494,<br>MN979495MN979505,<br>MN979506–MN979508,<br>MN979509–MN979511<br>MN979512, MN979513,<br>MN979514–MN979518,<br>MN979519, MN979520<br>MN979521–MN979525,<br>MN979526–MN979547,<br>MN979548, MN979549<br>MN979550–MN979557<br>MN979558, MN979559<br>MN979560–MN979599,<br>MN979600–MN979605,<br>MN979606–MN979609,<br>MN979610–MN979613,<br>MN979614–MN979616<br>MN979617–MN979618,<br>MN979619–MN979629,<br>MN979630–MN979743,<br>MN979644–MN979650,<br>MN979651–MN979663,<br>MN979664, MN979478,<br>MN979665–MN979679,<br>MN979680–MN979682,<br>MN979683, MN979684<br>MN979685–MN979698,<br>MN979699–MN979709,<br>MN979710, MN979711<br>MN979712–MN979717,<br>MN979718–MN979720,<br>MN979721–MN979724,<br>MN979725–MN979731,<br>MN979732–MN979737,<br>MN979738–MN979740, | 12 |

|                             |                                                                                                 |                                          |          |   |
|-----------------------------|-------------------------------------------------------------------------------------------------|------------------------------------------|----------|---|
|                             | CXWFC01–CXWFC03,<br>MBEG01, MHHA01                                                              | MN979741–MN979743,<br>MN979744, MN979745 |          |   |
| <i>S. vinogradovi</i>       | Avin S148087                                                                                    | MH973407                                 | 4        |   |
| <i>Scarturus i. indicus</i> | Aind BK16 Afganistan                                                                            | MH973413                                 | 4        |   |
| <i>Scarturus i. toussi</i>  | FUMZM1431                                                                                       | JQ954933                                 | 14       |   |
|                             | FUMZM1416                                                                                       | JQ954938                                 |          |   |
|                             | FUMZM2694–FUMZM2696                                                                             | JQ954954–JQ954956                        |          |   |
|                             | FUMZM1415, FUMZM1418,<br>FUMZM1430                                                              | JQ954957–JQ954959                        |          |   |
|                             | 14, 17, 18, 21                                                                                  | KX018304–KX018307                        | 15       |   |
|                             | ZMFUM2864, ZMFUM3557,<br>ZMFUM3558, ZMFUM3553,<br>ZMFUM2875, ZMFUM1434,<br>ZMFUM1438, ZMFUM3614 | KX219828–KX219835                        | 16       |   |
|                             | -                                                                                               | AJ389534                                 | 17       |   |
| <i>S. i. aralychensis</i>   | Aara Arm                                                                                        | MH973325                                 | 4        |   |
|                             | FUMZM2678–FUMZM2681                                                                             | JQ954934–JQ954937                        | 14       |   |
|                             | ZMFUM4503                                                                                       | KX219837                                 | 15       |   |
|                             | ECHAP1                                                                                          | MG255325                                 | 18       |   |
| <i>Scarturus e. elater</i>  | Aela Dag30                                                                                      | KM397178                                 | 3        |   |
|                             | Aela Kb16-75                                                                                    | MH973355                                 | 4        |   |
|                             | Aela K12-201                                                                                    | MH973326                                 |          |   |
|                             | Aela K12-266                                                                                    | MH973347                                 |          |   |
|                             | Aela Kb16-108                                                                                   | MH973357                                 |          |   |
|                             | Aela Kb16-34                                                                                    | MH973349                                 |          |   |
|                             | Aela Kb16-40                                                                                    | MH973368                                 |          |   |
|                             | Aela Kb16-41                                                                                    | MH973350                                 |          |   |
|                             | Aela Kb16-42                                                                                    | MH973351                                 |          |   |
|                             | Aela Kb16-71                                                                                    | MH973354                                 |          |   |
|                             | Aela Kb16-73                                                                                    | MH973365                                 |          |   |
|                             | Aela Kb16-76                                                                                    | MH973366                                 |          |   |
|                             | Aela Kb16-84                                                                                    | MH973356                                 |          |   |
|                             | Aela Kalmykia 2219                                                                              | MH973401                                 |          |   |
|                             | Aela Uz17-33                                                                                    | MH973385                                 |          |   |
|                             | Aela Uz17-34                                                                                    | MH973386                                 |          |   |
|                             | Aela Zoo                                                                                        | MH973324                                 |          |   |
|                             | Aela Kb16-26                                                                                    | MH973348                                 |          |   |
|                             | <i>S. e. zaisanicus</i>                                                                         | Aela K12-66                              | MH973327 | 4 |
|                             |                                                                                                 | Aela K12-67                              | MH973328 |   |
| Aela K12-74                 |                                                                                                 | MH973329                                 |          |   |
| Aela K13-24                 |                                                                                                 | MH973339                                 |          |   |
| Aela K13-25                 |                                                                                                 | MH973340                                 |          |   |
| Aela K13-26                 |                                                                                                 | MH973341                                 |          |   |
| Aela K13-27                 |                                                                                                 | MH973342                                 |          |   |

|                         |                                                                                                                                             |                                          |    |
|-------------------------|---------------------------------------------------------------------------------------------------------------------------------------------|------------------------------------------|----|
|                         | Aela K13-28                                                                                                                                 | MH973343                                 |    |
|                         | Aela K13-49                                                                                                                                 | MH973344                                 |    |
|                         | Aela K13-50                                                                                                                                 | MH973345                                 |    |
|                         | Aela K13-84                                                                                                                                 | MH973346                                 |    |
| <i>S. e. caucasicus</i> | Aela G17-2                                                                                                                                  | MH973399                                 |    |
|                         | Aela G17-3                                                                                                                                  | MH973400                                 |    |
|                         | Aela G17-1                                                                                                                                  | MH973398                                 |    |
| <i>S. e. strandi</i>    | Aest Uz17-19                                                                                                                                | MH973383                                 | 4  |
|                         | Aest Uz17-82                                                                                                                                | MH973394                                 |    |
|                         | Aest Uz17-05                                                                                                                                | MH973378                                 |    |
|                         | Aest Uz17-07                                                                                                                                | MH973380                                 |    |
|                         | Aest Uz17-08                                                                                                                                | MH973381                                 |    |
|                         | Aest Uz17-09                                                                                                                                | MH973402                                 |    |
|                         | Aest Uz17-23                                                                                                                                | MH973384                                 |    |
|                         | Aest Uz17-36                                                                                                                                | MH973403                                 |    |
|                         | Aest Uz17-44                                                                                                                                | MH973388                                 |    |
|                         | Aest Uz17-55                                                                                                                                | MH973389                                 |    |
|                         | Aest Uz17-71                                                                                                                                | MH973391                                 |    |
|                         | Aest Uz17-74                                                                                                                                | MH973392                                 |    |
|                         | Aest Uz17-83                                                                                                                                | MH973395                                 |    |
|                         | FUMZM 2674                                                                                                                                  | JQ954928                                 |    |
|                         | FUMZM 2128                                                                                                                                  | JQ954931                                 |    |
|                         | FUMZM 1429                                                                                                                                  | JQ954932                                 |    |
|                         | ZMFUM1377,ZMFUM1412,<br>ZMFUM2084,ZMFUM1740,<br>ZMFUM3542,ZMFUM1905,<br>ZMFUM2704,ZMFUM2749,<br>ZMFUM2842,ZMFUM2862,<br>ZMFUM1374,ZMFUM2897 | KX219804– KX219815                       | 15 |
| <i>S. e. dzungariae</i> | Aedz Xin12-1                                                                                                                                | MH973330                                 | 4  |
|                         | XJ18107                                                                                                                                     | MN979459                                 |    |
|                         | Aedz M15-131                                                                                                                                | MH973335                                 |    |
| <i>S. euphratica</i>    | FUMZM 2129                                                                                                                                  | JQ954953                                 | 14 |
|                         | Har1– Har4                                                                                                                                  | KC465442– KC465445                       | 19 |
|                         | ECHAP3– ECHAP11                                                                                                                             | MG255326–MG255334                        | 18 |
| <i>S. aulacotis</i>     | Kar1– Kar4, Dam1                                                                                                                            | KC465446–KC465450                        | 19 |
| <i>S. williamsi</i>     | 2688–2139                                                                                                                                   | JQ954944– JQ954952                       | 14 |
|                         | Kon1, Kon2, Kes1,<br>Leb1, Leb2                                                                                                             | KC465439– C465441,<br>KC465451– KC465452 | 19 |
|                         | ECHAP12– ECHAP86                                                                                                                            | MG255335–MG255409                        | 18 |
| <i>S. heptneri</i>      | Ahep K15-22                                                                                                                                 | MH973333                                 | 4  |
|                         | Ahep K15-27                                                                                                                                 | MH973334                                 |    |
|                         | Ahep K15-8                                                                                                                                  | MH973332                                 |    |
|                         | Ahep Kb16-109                                                                                                                               | MH973358                                 |    |

|                                                                                                          |                                                                                  |                                         |
|----------------------------------------------------------------------------------------------------------|----------------------------------------------------------------------------------|-----------------------------------------|
| Ahep Kb16-118                                                                                            | MH973359                                                                         |                                         |
| Ahep Kb16-121                                                                                            | MH973360                                                                         |                                         |
| Ahep Kb16-126                                                                                            | MH973367                                                                         |                                         |
| Ahep Kb16-130                                                                                            | MH973361                                                                         |                                         |
| Ahep Kb16-135                                                                                            | MH973362                                                                         |                                         |
| Ahep Kb16-136                                                                                            | MH973363                                                                         |                                         |
| Ahep Kb16-1AR                                                                                            | MH973336                                                                         |                                         |
| Ahep Kb16-2AR                                                                                            | MH973337                                                                         |                                         |
| Ahep Kb16-43                                                                                             | MH973369                                                                         |                                         |
| Ahep Kb16-44                                                                                             | MH973370                                                                         |                                         |
| Ahep Kb16-45                                                                                             | MH973371                                                                         |                                         |
| Ahep Kb16-46                                                                                             | MH973372                                                                         |                                         |
| Ahep Kb16-49                                                                                             | MH973352                                                                         |                                         |
| Ahep Kb16-50                                                                                             | MH973373                                                                         |                                         |
| Ahep Kb16-51                                                                                             | MH973374                                                                         |                                         |
| Ahep Kb16-53                                                                                             | MH973375                                                                         |                                         |
| Ahep Kb16-54                                                                                             | MH973376                                                                         |                                         |
| Ahep Kb16-55                                                                                             | MH973353                                                                         |                                         |
| Ahep Kb16-60                                                                                             | MH973377                                                                         |                                         |
| Ahep Kb16-61                                                                                             | MH973364                                                                         |                                         |
| Ahep Kb16-6AR                                                                                            | MH973338                                                                         |                                         |
| Ahep Uz17-06                                                                                             | MH973379                                                                         |                                         |
| Ahep Uz17-1479                                                                                           | MH973396                                                                         |                                         |
| Ahep Uz17-1480                                                                                           | MH973397                                                                         |                                         |
| Ahep Uz17-18                                                                                             | MH973382                                                                         |                                         |
| Ahep Uz17-37                                                                                             | MH973387                                                                         |                                         |
| Ahep Uz17-66                                                                                             | MH973404                                                                         |                                         |
| Ahep Uz17-68                                                                                             | MH973390                                                                         |                                         |
| Ahep Uz17-75                                                                                             | MH973393                                                                         |                                         |
| Ahep Uz17-80                                                                                             | MH973405                                                                         |                                         |
| Ahep Uz17-81                                                                                             | MH973406                                                                         |                                         |
| Ahep Zoo2013                                                                                             | MH973331                                                                         |                                         |
| FUMZA 2675                                                                                               | JQ954927                                                                         | <sup>14</sup>                           |
| FUMZM 2676                                                                                               | JQ954929                                                                         |                                         |
| FUMZM 2677                                                                                               | JQ954930                                                                         |                                         |
| ZMFUM2732,ZMFUM2738,<br>ZMFUM2751,ZMFUM3547,<br>ZMFUM3548,ZMFUM3554,<br>ZMFUM3601–ZMFUM3609<br>ZMFUM3613 | KX219816–KX219827                                                                | <sup>15</sup>                           |
| <i>S. hotsoni</i>                                                                                        | 11, 12, 13, 15, 16, 19, 20–24                                                    | KX018295–KX018303 <sup>15</sup>         |
|                                                                                                          | FUMZM 2682, FUMZM<br>2684, FUMZM 2686,<br>FUMZM 2687, FUMZM<br>2685, FUMZM 1277, | JQ954939–JQ954943,<br>JQ954960–JQ954962 |

|                                | FUMZM 1521, FUMZM 1533 |                    |    |
|--------------------------------|------------------------|--------------------|----|
| <i>Dipus sagitta</i>           | ZMMU S179627           | MF076858           | 20 |
|                                | M13-149                | MF535703           | 21 |
| <i>Jaculus jaculus</i>         | sc27,<br>sc31          | JN214514, JN214518 | 22 |
| <i>Cardiocranium paradoxus</i> | ZMMU S188830           | KM397211           | 3  |
| <i>Salpingotus kozlovi</i>     | M13-28 / ZMMU S183051  | KM397210           | 3  |
| <i>Euchoreutes naso</i>        | M05-129 / ZMMU S179636 | KM397212           | 3  |
|                                | -                      | KP981634           | 23 |



|                                                     |                |          |          |          |          |          |          |          |          |          |          |          |          |          |          |          |          |
|-----------------------------------------------------|----------------|----------|----------|----------|----------|----------|----------|----------|----------|----------|----------|----------|----------|----------|----------|----------|----------|
| <i>O. balikhunica</i>                               | Xin12-Ab1      | ----     | ----     | ----     | ----     | ----     | ----     | ----     | ----     | ----     | ----     | ----     | ----     | ----     | ----     | ----     | OL495129 |
| <i>Pygeretmus pumilio</i>                           | Ppum K12-68    | OL495177 | OL494611 | OL495064 | OL494564 | OL494512 | OL494665 | OL494723 | OL495012 | OL494953 | OL494841 | OL494783 | OL494896 | OL494397 | OL495223 | OL494451 | OL495130 |
| <i>P. pumilio</i>                                   | Ppum Uz17-51   | OL495178 | OL494612 | OL495065 | OL494565 | OL494513 | OL494666 | OL494724 | OL495013 | OL494954 | OL494842 | OL494784 | OL494897 | OL494398 | OL495224 | OL494452 | OL495131 |
| <i>P. pumilio</i>                                   | Ppum M06-153   | ***      | ***      | ***      | ***      | OL494514 | OL494667 | OL494725 | OL495014 | OL494955 | OL494843 | OL494785 | OL494898 | OL494399 | OL495225 | OL494453 | ***      |
| <i>P. pumilio</i>                                   | Ppum M11-100   | ----     | ----     | ----     | ----     | ----     | ----     | ----     | ----     | ----     | ----     | ----     | ----     | ----     | ----     | ----     | OL495132 |
| <i>P. pumilio</i>                                   | Ppum K12-245   | ----     | ----     | ----     | ----     | ----     | ----     | ----     | ----     | ----     | ----     | ----     | ----     | ----     | ----     | ----     | OL495133 |
| <i>P. pumilio</i>                                   | Ppum K12-251   | ----     | ----     | ----     | ----     | ----     | ----     | ----     | ----     | ----     | ----     | ----     | ----     | ----     | ----     | ----     | OL495134 |
| <i>P. pumilio</i>                                   | Ppum K12-261   | ----     | ----     | ----     | ----     | ----     | ----     | ----     | ----     | ----     | ----     | ----     | ----     | ----     | ----     | ----     | OL495135 |
| <i>P. pumilio</i>                                   | Ppum K12-262   | ----     | ----     | ----     | ----     | ----     | ----     | ----     | ----     | ----     | ----     | ----     | ----     | ----     | ----     | ----     | OL495136 |
| <i>P. pumilio</i>                                   | Ppum K12-204   | ----     | ----     | ----     | ----     | ----     | ----     | ----     | ----     | ----     | ----     | ----     | ----     | ----     | ----     | ----     | OL495137 |
| <i>P. pumilio</i>                                   | Ppum Xin12-Pp3 | ----     | ----     | ----     | ----     | ----     | ----     | ----     | ----     | ----     | ----     | ----     | ----     | ----     | ----     | ----     | OL495138 |
| <i>P. pumilio</i>                                   | Ppum Uz17-54   | ----     | ----     | ----     | ----     | ----     | ----     | ----     | ----     | ----     | ----     | ----     | ----     | ----     | ----     | ----     | OL495139 |
| <i>P. platyurus</i>                                 | Ppla K12-297   | OL495179 | OL494613 | OL495066 | OL494566 | OL494515 | OL494668 | OL494726 | OL495015 | OL494956 | OL494844 | OL494786 | OL494899 | OL494400 | OL495226 | OL494454 | OL495258 |
| <i>P. platyurus</i>                                 | Ppla K12-302   | OL495180 | OL494614 | OL495067 | OL494567 | OL494516 | OL494669 | OL494727 | OL495016 | OL494957 | OL494845 | OL494787 | OL494900 | OL494401 | OL495227 | OL494455 | OL495140 |
| <i>P. shitkovi</i>                                  | Pshi Kb16-122  | OL495181 | OL494615 | OL495068 | OL494568 | OL494517 | OL494670 | OL494728 | OL495017 | OL494958 | OL494846 | OL494788 | OL494901 | OL494402 | OL495228 | OL494456 | OL495141 |
| <i>P. shitkovi</i>                                  | Pshi Zoo       | OL495182 | OL494616 | OL495069 | OL494569 | OL494518 | ----     | OL494729 | OL495018 | OL494959 | OL494847 | ----     | OL494902 | OL494403 | OL495229 | OL494457 | OL495142 |
| <i>P. shitkovi</i>                                  | Pshi Kb16-123  | ----     | ----     | ----     | ----     | ----     | ----     | ----     | ----     | ----     | ----     | ----     | ----     | ----     | ----     | ----     | OL495143 |
| <i>P. shitkovi</i>                                  | Pshi Kb16-124  | ----     | ----     | ----     | ----     | ----     | ----     | ----     | ----     | ----     | ----     | ----     | ----     | ----     | ----     | ----     | OL495144 |
| <i>Scarturus williamsi</i>                          | Awil BK1       | OL495183 | OL494617 | OL495070 | OL494570 | OL494519 | OL494671 | OL494730 | OL495019 | OL494960 | OL494848 | OL494789 | OL494903 | OL494404 | OL495230 | OL494458 | ***      |
| <i>S. williamsi</i>                                 | Awil BK3       | OL495184 | OL494618 | OL495071 | OL494571 | OL494520 | OL494672 | OL494731 | OL495020 | OL494961 | OL494849 | OL494790 | OL494904 | OL494405 | OL495231 | OL494459 | ***      |
| <i>S. williamsi</i>                                 | Awil BK29      | OL495185 | OL494619 | OL495072 | OL494572 | OL494521 | OL494673 | OL494732 | OL495021 | OL494962 | OL494850 | OL494791 | OL494905 | OL494406 | OL495232 | OL494460 | ***      |
| <i>S. williamsi</i>                                 | Awil 10EA      | OL495186 | OL494620 | OL495073 | OL494573 | OL494522 | OL494674 | OL494733 | OL495022 | OL494963 | OL494851 | OL494792 | OL494906 | OL494407 | OL495233 | OL494461 | ----     |
| <i>S. williamsi</i>                                 | Awil 11EA      | OL495187 | OL494621 | OL495074 | OL494574 | OL494523 | OL494675 | OL494734 | OL495023 | OL494964 | OL494852 | OL494793 | OL494907 | OL494408 | OL495234 | OL494462 | OL495145 |
| <i>S. euphraticus</i>                               | Aeup BK5       | OL495188 | OL494622 | OL495075 | OL494575 | OL494524 | OL494676 | OL494735 | OL495024 | OL494965 | OL494853 | OL494794 | OL494908 | OL494409 | OL495235 | OL494463 | ***      |
| <i>S. euphraticus</i>                               | Aeup BK6       | OL495189 | OL494623 | OL495076 | OL494576 | OL494525 | OL494677 | OL494736 | OL495025 | OL494966 | OL494854 | OL494795 | OL494909 | OL494410 | OL495236 | OL494464 | ***      |
| <i>S. aulacotis</i>                                 | Aaul BK23      | OL495190 | OL494624 | OL495077 | OL494577 | OL494526 | OL494678 | OL494737 | OL495026 | OL494967 | OL494855 | OL494796 | OL494910 | OL494411 | OL495237 | OL494465 | ***      |
| <i>S. aulacotis</i>                                 | Aaul BK28      | OL495191 | OL494625 | OL495078 | OL494578 | OL494527 | OL494679 | OL494738 | OL495027 | OL494968 | OL494856 | OL494797 | OL494911 | OL494412 | OL495238 | OL494466 | ***      |
| <i>S. elater elater</i>                             | Aela Dag30     | ***      | ***      | ***      | ***      | OL494528 | OL494680 | OL494739 | OL495028 | OL494969 | OL494857 | OL494798 | OL494912 | OL494413 | OL495239 | OL494467 | ***      |
| <i>S. e. elater</i>                                 | Aela K16-26    | OL495192 | OL494626 | OL495079 | OL494579 | OL494529 | OL494681 | OL494740 | OL495029 | OL494970 | OL494858 | OL494799 | OL494913 | OL494414 | OL495240 | OL494468 | ***      |
| <i>S. e. zaisanicus</i>                             | Aeza 13-24     | ***      | OL494627 | ***      | OL494580 | OL494530 | OL494682 | OL494741 | OL495030 | OL494971 | OL494859 | OL494800 | OL494914 | OL494415 | OL495241 | OL494469 | ***      |
| <i>S. e. dzungariae</i>                             | Aezd Xin12-Ae1 | ***      | OL494632 | ***      | OL494585 | OL494535 | OL494687 | OL494746 | OL495035 | OL494976 | OL494864 | OL494805 | OL494919 | OL494420 | OL495246 | OL494474 | ***      |
| <i>S. e. dzungariae</i>                             | Aezd M15-131   | OL495194 | OL494633 | OL495081 | OL494586 | OL494536 | OL494688 | OL494747 | OL495036 | OL494977 | OL494865 | OL494806 | OL494920 | OL494421 | OL495247 | OL494475 | ***      |
| <i>S. e. caucasicus</i>                             | Aela G17-1     | ***      | OL494636 | ***      | OL494588 | OL494539 | OL494691 | OL494750 | OL495039 | OL494980 | OL494868 | OL494809 | OL494923 | OL494424 | OL495250 | OL494478 | ***      |
| <i>S. e. strandi</i>                                | Aest Uz17-19   | ***      | OL494638 | ***      | OL494590 | OL494541 | OL494693 | OL494752 | OL495041 | OL494982 | OL494870 | OL494811 | OL494925 | OL494426 | OL495252 | OL494480 | ***      |
| <i>S. e. strandi</i>                                | Aest Uz17-82   | ***      | OL494639 | ***      | OL494591 | OL494542 | OL494694 | OL494753 | OL495042 | OL494983 | OL494871 | OL494812 | OL494926 | OL494427 | OL495253 | OL494481 | ***      |
| <i>S. e. strandi</i>                                | Aest 04SK      | ----     | ----     | ----     | ----     | ----     | ----     | ----     | ----     | ----     | ----     | ----     | ----     | ----     | ----     | ----     | OL495153 |
| <i>S. e. strandi</i>                                | Aest 05SK      | ----     | ----     | ----     | ----     | ----     | ----     | ----     | ----     | ----     | ----     | ----     | ----     | ----     | ----     | ----     | OL495154 |
| <i>S. e. strandi</i>                                | Aest 07SK      | OL495197 | OL494640 | OL495084 | ----     | OL494543 | OL494695 | OL494754 | OL495043 | OL494984 | OL494872 | OL494813 | OL494927 | OL494428 | OL495254 | OL494482 | OL495155 |
| <i>S. e. strandi</i>                                | Aest 08SK      | ----     | ----     | ----     | ----     | ----     | ----     | ----     | ----     | ----     | ----     | ----     | ----     | ----     | ----     | ----     | OL495156 |
| <i>S. heptneri</i>                                  | Ahep K15-7     | ***      | OL494628 | ***      | OL494581 | OL494531 | OL494683 | OL494742 | OL495031 | OL494972 | OL494860 | OL494801 | OL494915 | OL494416 | OL495242 | OL494470 | ***      |
| <i>S. heptneri</i>                                  | Ahep Uz17-75   | ***      | OL494629 | ***      | OL494582 | OL494532 | OL494684 | OL494743 | OL495032 | OL494973 | OL494861 | OL494802 | OL494916 | OL494417 | OL495243 | OL494471 | ***      |
| <i>S. heptneri</i>                                  | Ahep Uz17-80   | ***      | OL494630 | ***      | OL494583 | OL494533 | OL494685 | OL494744 | OL495033 | OL494974 | OL494862 | OL494803 | OL494917 | OL494418 | OL495244 | OL494472 | ***      |
| <i>S. heptneri</i>                                  | Ahep 01RK      | OL495193 | OL494637 | OL495080 | OL494584 | OL494534 | OL494686 | OL494745 | OL495034 | OL494975 | OL494863 | OL494804 | OL494918 | OL494419 | OL495245 | OL494473 | OL495146 |
| <i>S. heptneri</i>                                  | Ahep 02RK      | ----     | ----     | ----     | ----     | ----     | ----     | ----     | ----     | ----     | ----     | ----     | ----     | ----     | ----     | ----     | OL495147 |
| <i>S. heptneri</i>                                  | Ahep 03RK      | ----     | ----     | ----     | ----     | ----     | ----     | ----     | ----     | ----     | ----     | ----     | ----     | ----     | ----     | ----     | OL495148 |
| <i>S. heptneri</i>                                  | Ahep 39NK      | ----     | ----     | ----     | ----     | ----     | ----     | ----     | ----     | ----     | ----     | ----     | ----     | ----     | ----     | ----     | OL495149 |
| <i>S. indicus toussi</i>                            | Aind 33SP      | OL495199 | OL494642 | OL495085 | OL494593 | OL494545 | OL494696 | OL494756 | OL495045 | OL494986 | OL494873 | OL494815 | OL494929 | ----     | OL495256 | OL494484 | ----     |
| <i>S. i. toussi</i>                                 | Aind 35EN      | OL495200 | OL494643 | OL495086 | OL494594 | OL494546 | OL494697 | OL494757 | OL495046 | OL494987 | OL494874 | OL494816 | OL494930 | ----     | OL495257 | OL494485 | OL495158 |
| <i>S. i. toussi</i>                                 | Aind 06SK      | ----     | ----     | ----     | ----     | ----     | ----     | ----     | ----     | ----     | ----     | ----     | ----     | ----     | ----     | ----     | OL495159 |
| <i>S. i. aralychensis</i>                           | Aara Arm       | ***      | OL494634 | ***      | ----     | OL494537 | OL494689 | OL494748 | OL495037 | OL494978 | OL494866 | OL494807 | OL494921 | OL494422 | OL495248 | OL494476 | ***      |
| <i>S. i. aralychensis</i>                           | Aara 41HA      | OL495195 | OL494635 | OL495082 | OL494587 | OL494538 | OL494690 | OL494749 | OL495038 | OL494979 | OL494867 | OL494808 | OL494922 | OL494423 | OL495249 | OL494477 | OL495150 |
| <i>S. i. aralychensis</i>                           | Aara 09HK      | ----     | ----     | ----     | ----     | ----     | ----     | ----     | ----     | ----     | ----     | ----     | ----     | ----     | ----     | ----     | OL495151 |
| <i>Scarturus caprimulga</i>                         | Acap BK12      | ----     | ----     | ----     | ----     | ----     | ----     | ----     | ----     | ----     | ----     | ----     | ----     | ----     | ----     | ----     | OL589003 |
| <i>Scarturus sp. Kopet Dag (S. aff. caprimulga)</i> | Asp IR1        | OL495196 | OL494631 | OL495083 | OL494589 | OL494540 | OL494692 | OL494751 | OL495040 | OL494981 | OL494869 | OL494810 | OL494924 | OL494425 | OL495251 | OL494479 | OL495152 |
| <i>S. hotsoni</i>                                   | Ahot 34SP      | OL495198 | OL494641 | ----     | OL494592 | OL494544 | ----     | OL494755 | OL495044 | OL494985 | ----     | OL494814 | OL494928 | OL494429 | OL495255 | OL494483 | OL495157 |





## Supplementary methods

### Molecular procedures

#### *Modern DNA extraction, amplification, and sequencing*

The total DNA of modern specimens was extracted from tissues stored in alcohol using a standard protocol of proteinase K digestion, phenol-chloroform deproteinization, and isopropanol precipitation<sup>24</sup>. Primers used in amplification and sequencing of *BRCAl*, *IRBP*, *GHR*, *RAG1*, and *BRCA2* nuclear genes and the PCR conditions were described in the previous studies<sup>1,20,25</sup>. The *cytb* gene in most species from the sample was amplified with the primers by Montgelard et al.<sup>17</sup> and sequenced using primers from Bannikova et al.<sup>4</sup>; however, primers utilized for *cytb* of *Pygeretmus* spp. and short fragments of *cytb* of the museum specimens were specifically designed for this study (SuppInfo, Table S4). The amplification conditions for the nuclear loci included the initial denaturation at 95°C for 3 min, 36 cycles of 95°C for 30 s, 57–62°C (depending on the primer) for 45 s, 72°C for 1 min, and a final extension of 72°C for 6 min.

#### *Amplification and sequencing of historical DNA*

The total DNA of 12 jerboas was extracted from dried skins or bones of museum collection specimens (age range 30-80 years): *Scarturus vinogradovi*, *S. caprimulga* Ellerman, 1948, *Allactaga major spiculum* (Lichtenstein, 1825), and nine specimens of *Orientalactaga sibirica* Forster, 1778 (SuppInfo, Table S1). The DNA was purified directly using the MiniElute PCR Purification Kit (QIAGEN) including an overnight lysis step following the manufacturer's protocol and recommendations of Yang et al.<sup>26</sup>. All stages of the extraction process included a negative control run in parallel. Only short fragments of *cytb* were obtained using the internal primers (Table S4) for *A. m. spiculum* (661 bp) and nine specimens of *O. sibirica* (592 bp). For *S. vinogradovi*, the fragments of seven nuclear genes were amplified and sequenced: *BRCAl* (two fragments with a total length of 541 bp), exon 10 of *GHR* (398 bp), *vWF* (491 bp), *ATP7a* (679 bp), *c-myc* (501 bp), *A2AB* (478 bp), and *IRBP* (383 bp in addition to previously sequenced 250 bp<sup>4</sup>). The PCR program for amplification of short fragments included the initial denaturation at 95°C for 3 min, 45 cycles at 95°C for 30 s, 52-60°C (depending on the primer) for 30 s, 72°C for 30 s, and a final extension at 72°C for 6 min. To avoid contamination, the

extraction and amplification of the DNA of museum specimens were performed in the dedicated facilities of ZMMU Laboratory of Historical DNA, exclusively equipped for the work with historical and ancient DNA, where no previous work on fresh tissues had been performed.

The PCR products were purified using a Diatom™ DNA PCR Clean-Up (Diatom, Moscow, Russia). Approximately 10–30 ng of the purified PCR product was used for sequencing with each primer with an ABI 3100-Avant Genetic Analyzer using the BigDye™ Terminator Chemistry v. 3.1 (Applied Biosystems).

#### *Putative cytb pseudogene in Pygeretmus platyurus*

The *cytb* sequence of one of the *P. platyurus* specimens (K12-297) that was initially obtained with the L0/H0 primer combination contained a stop codon (AGA) at the position 299, and thus is likely a sequence of a nuclear pseudogene. The sequence of the second specimen (k12-302) contained multiple positions with two peaks of approximately equal intensity. Using a set of de novo designed primers (L682, H711, H828) we were able to obtain two separate sequences for K12-302, one of which was similar to that of K12-907 (*p*-distance <1%), while the other substantially diverged from it (*p*-distance =11.2%). The latter sequence contained no stop codons, frame-shift mutations, or excessive number of non-synonymous mutations, hence it was assumed to belong to the authentic mitochondrial *cytb* gene.

#### *Sequence processing*

All sequences were aligned by eye using BioEdit version 7.0.9.0<sup>27</sup>. Heterozygous positions (at which two peaks of approximately equal intensity are observed) were coded using the IUB ambiguity codes.

It should be noted that *RAG2* sequences obtained by Wu et al<sup>2</sup> for *A. major*, *O. sibirica*, *O. bullata*, *A. bobrinskii*, and *P. pumilio* (JF938894–JF938896, JF938899, JF938900) are highly divergent from other sequences of Dipodidae including our newly obtained

sequences for the same species ( $p$ -distance=11%). Thus, they likely originate from a paralog, and their inclusion in the analysis by Wu et al<sup>2</sup> could have affected the results.

**Table S4.** Primers used for amplification and sequencing.

| Primers                                                                       | sequence (5'→3')          | comments      | Reference  |
|-------------------------------------------------------------------------------|---------------------------|---------------|------------|
| <b><i>A2AB</i> – Alpha-2B adrenergic receptor</b>                             |                           |               |            |
| a2ab-11Fa                                                                     | CCATCACCTTCCTCATCCTCTTCAC | All Dipodidae | This study |
| a2ab-15Ra                                                                     | ATCAGGTAGATGCGMAGGTAGACG  | All Dipodidae | This study |
| <b><i>ATP7a</i> – ATPase copper transporting alpha, exon</b>                  |                           |               |            |
| atp7a-11Fa                                                                    | TCCCTGGACAACCAAGAAGC      | All Dipodidae | This study |
| atp7a-15Ra                                                                    | CTTTCAAGACAGCATCAAATCCCAT | All Dipodidae | This study |
| <b><i>CREM</i> – cAMP-responsive element modulator</b>                        |                           |               |            |
| Jac_F1b                                                                       | AGGAACTCAAGGCCCTCAAAGAT   | All Dipodidae | This study |
| Jac_R1b                                                                       | TGGGAGAGCAAATGTCTTTCAAGGT | All Dipodidae | This study |
| <b><i>vWF</i> von Willebrand Factor, exon 28</b>                              |                           |               |            |
| 101Fa                                                                         | TGTAAACCTCACCTGTGAAGCCTG  | All Dipodidae | This study |
| R500a                                                                         | GATCACRGTGACCTTCTTCTTCTC  | All Dipodidae | This study |
| F101g1                                                                        | TGTBAACCTYACSTGTGAAGCCTG  | All Dipodidae | This study |
| 103R                                                                          | GACCTTCTTCTTCTTCAAGCCCTGG | All Dipodidae | This study |
| <b><i>ACP5</i> – acid phosphatase 5, tartrate resistant exon &amp; intron</b> |                           |               |            |
| 120fwd_1                                                                      | CYAATGCCCCATTCCACACAGC    | All Dipodidae | This study |

|                                                                              |                              |                       |              |
|------------------------------------------------------------------------------|------------------------------|-----------------------|--------------|
| R590a                                                                        | CGCTTGGAGATCTTGGAGTAGGCA     | All Dipodidae         | This study   |
| 564rev_1                                                                     | GCAGAGACRTTGCCAAGGTG         | <i>Scartus</i> spp.   | This study   |
| <b><i>APOB</i> – Apolipoprotein B, exon</b>                                  |                              |                       |              |
| F1370a                                                                       | CTGGAGAAGCCAMTCTCCRACGCAT    | All Dipodidae         | This study   |
| R2440b                                                                       | YGTGGAATCCAGGAAKGTTTCAAC     | All Dipodidae         | This study   |
| <b><i>c-myc</i> – MYC proto-oncogene, bHLH transcription factor, exon</b>    |                              |                       |              |
| F2007a                                                                       | GAAGATGAGGAAGAAATTGATGTTGT   | All Dipodidae         | This study   |
| R2537a                                                                       | CTACGCACCAGAGTTTCGCAGC       | All Dipodidae         | This study   |
| <b><i>LCAT</i> – lecithin-cholesterol acyltransferase, exon &amp; intron</b> |                              |                       |              |
| R468a                                                                        | CATTGATGTGCTCCAGTGTCTTATTGCT | All Dipodidae         | This study   |
| F10a                                                                         | CATCCCGATYATGTCCAGYATCAAGC   | All Dipodidae         | This study   |
| <b><i>IRBP</i> – interphotoreceptor retinoid-binding protein, exon</b>       |                              |                       |              |
| F25dip                                                                       | GCGGCCATCCARCAGGTAATGAAGAG   | All Dipodidae         | <sup>1</sup> |
| R1175dip                                                                     | GCACTGACACCTGAAACACAGAGTCCAC | All Dipodidae         | <sup>1</sup> |
| F597dip (internal)                                                           | GGACATCGCCTACATCCTCAAGCAGA   | All Dipodidae         | <sup>1</sup> |
| R701dip (internal)                                                           | GGACACGGGCACCGTGAGGAAGAAGT   | All Dipodidae         | <sup>1</sup> |
| F459_Av                                                                      | CGTCGTGCACGTGGACACCATCTAT    | <i>S. vinogradovi</i> | <sup>4</sup> |
| R701b_Av                                                                     | ACACGGGCACCGTRAGGAAGAAGT     | <i>S. vinogradovi</i> | <sup>4</sup> |

---

***GHR* – gGrowth hormone receptor, exon 10**

---

|           |                            |               |              |
|-----------|----------------------------|---------------|--------------|
| ghr_dip_F | GCCATTCATGATAACTACAAATCTGA | All Dipodidae | <sup>1</sup> |
| ghr_dip_R | ATAGCCACAAGATGAGAGGAACTC   | All Dipodidae | <sup>1</sup> |
| ghr_zap_R | ATAGCCACAAGATGCCAGGGACTC   | All Dipodidae | <sup>1</sup> |

---

***BRCA1* – breast cancer type 1 susceptibility protein, exon 11**

---

|                |                                       |               |              |
|----------------|---------------------------------------|---------------|--------------|
| brca_All-1135F | GAGAACAGCAGTTTATTACYCACTAAAGACA<br>G  | All Dipodidae | <sup>1</sup> |
| brca_zap100F   | TGTGGCACAGATGTTTCRTGCCAGCTCATTAC<br>A | All Dipodidae | <sup>1</sup> |
| brca_All_982R  | CTACTGGATTCACATTTTCCTCTTTCTG          | All Dipodidae | <sup>1</sup> |
| brca_zap980R   | CTACTGGATTCTCACTTTTCCTCTTTCTGAA       | All Dipodidae | <sup>1</sup> |

---

***BRCA2* – breast cancer type 2 susceptibility protein, exon**

---

|        |                                 |               |               |
|--------|---------------------------------|---------------|---------------|
| F1381a | TCTACTATATTAGAAGAATCAGGAAGTCAAT | All Dipodidae | <sup>25</sup> |
| R2263a | GGAGACTTTGATGTTTTTCCACTTGC      | All Dipodidae | This study    |

---

***RAG1* – recombination activating gene 1, exon**

---

|               |                               |               |              |
|---------------|-------------------------------|---------------|--------------|
| rag1_all-940F | GACCTGGAGAGTCCAGTGAAGTCCTTTCT | All Dipodidae | <sup>1</sup> |
| rag1_all-980F | TGAATTCCTGATGGTRAAATGTCC      | All Dipodidae | <sup>1</sup> |
| rag1-dip2117R | ACGRGTAGCATCACAAAGAGTACAAATGT | All Dipodidae | <sup>1</sup> |
| rag1-A1613R   | CTGGGTAATCATCCACAGAGGAGACAAG  | All Dipodidae | <sup>1</sup> |

---

---

**RAG2 – recombination activating gene 1, exon**

---

|              |                                 |               |            |
|--------------|---------------------------------|---------------|------------|
| rag2_dip10F  | GGAGGRCGGTCTACATGCCTTCTAC       | All Dipodidae | This study |
| rag2_dip806R | GGTACCCAAGTATTAATATCCACRTCACAAG | All Dipodidae | This study |

---

**CNRI – Cannabinoid Receptor 1, exon**

---

|           |                            |               |            |
|-----------|----------------------------|---------------|------------|
| dip_F50   | GGCAGTCCCTTCCAAGAAAAGATGAC | All Dipodidae | This study |
| dip_F53   | GTCCCTTCCAAGAAAAGATGACTGC  | All Dipodidae | This study |
| dip_R1036 | CACGGTGGAGTTCAGGAGGCAGAG   | All Dipodidae | This study |
| zap_R1036 | CACGGTGGAGTTCAGCAGGCAGAG   | All Dipodidae | This study |

---

**Cytb – cytochrome b**

---

|                   |                                |                                                 |               |
|-------------------|--------------------------------|-------------------------------------------------|---------------|
| L7-fw             | ACCAATGACATGAAAAATCATCGTT      | All Dipodidae                                   | <sup>17</sup> |
| H6-rev            | TCTCCATTTCTGGTTTACAAGAC        | All Dipodidae                                   | <sup>17</sup> |
| H601ae (internal) | GGGTTGTTGGATCCTGTTTCGTG        | All Dipodidae                                   | <sup>4</sup>  |
| L400ae (internal) | CCATGAGGACAAATATCMTTCTGAG      | All Dipodidae                                   | <sup>4</sup>  |
| L543_Av           | CCACTTCATCCTCCCATTCATTGT       | <i>S. vinogradovi</i> ,<br><i>S. caprimulga</i> | This study    |
| L298_A1           | CGAGGACTATACTACGGMTCATACAC     | <i>S. vinogradovi</i> ,<br><i>S. caprimulga</i> | This study    |
| H751_A1           | GCTGGTGTGTAGTTGTCTGGGTCTCC     | <i>S. vinogradovi</i>                           | This study    |
| L70b              | CCCATCYAACATCTCYGCATGATGAAACTT | <i>S. vinogradovi</i>                           | This study    |

---

|                      |                                |                        |            |
|----------------------|--------------------------------|------------------------|------------|
| L153b                | AGCTATACAYTACACATCCGAYACCACAAC | <i>S. vinogradovi</i>  | This study |
| H943                 | ACATTGGCTGATTGGTCGGAAGATTAT    | <i>S. vinogradovi</i>  | This study |
| H883b                | AGGGCTAGGATTAGRATWGATAGGAC     | <i>S. vinogradovi</i>  | This study |
| H341                 | CAGTGAATAGAAGTAGGACTCCGATGT    | <i>S. vinogradovi</i>  | This study |
| L677                 | CTAAAGACGCCCTAGGATTCATACTC     | <i>S. vinogradovi</i>  | This study |
| H328a                | GTAGTACTCCGATGTTTCAGGTTTC      | <i>S. caprimulga</i>   | This study |
| L710a                | TCCTCCTTATATTGGTCCTATTTTCC     | <i>S. caprimulga</i>   | This study |
| L0a_pyg              | CATCGTTGTWAATTCAACTACAAAAACCTA | <i>Pygeretmus spp.</i> | This study |
| H0a_pyg              | GACCAGGGTAATWTTTATACTACAAAG    | <i>Pygeretmus spp.</i> | This study |
| L537a_pyg (internal) | CGCCTTTCACTTYATCCTMCCATTCATC   | <i>Pygeretmus spp.</i> | This study |
| L468a_pyg (internal) | TCGGAACAACCYTAGTAGAATGAAT      | <i>Pygeretmus spp.</i> | This study |
| H667b_pyg (internal) | TCCTAGGGCGTCYTTGATTGT          | <i>Pygeretmus spp.</i> | This study |
| H758a_pyg (internal) | GGRTTAGCTGGTGTRTAGTTGTCTG      | <i>Pygeretmus spp.</i> | This study |
| H711_plat (internal) | GGGAGAAGAGGACTAGGAGAAGGAGAAGA  | <i>P. platyurus</i>    | This study |
| H711_plat (internal) | GGGAGAAGAGGACTAGGAGAAGGAGAAGA  | <i>P. platyurus</i>    | This study |
| L682_plat (internal) | GCCTTAGGATTCCTATTCCTTATTCTT    | <i>P. platyurus</i>    | This study |
| H828_plat (internal) | TGATCGGAGGATAGCGTAGGCG         | <i>P. platyurus</i>    | This study |
| L696_plat (internal) | CCTATTCCTTATTCTTCTTCTCCTTCTC   | <i>P. platyurus</i>    | This study |



---

|          |                             |                                                  |            |
|----------|-----------------------------|--------------------------------------------------|------------|
| L236_Am2 | TGACTRATCCGATAYCTACACGCCAAC | <i>Orientallactaga sibirica, Allactaga major</i> | This study |
| H479_Am3 | GAARCCYCCTCAGATTCAYTCTACTA  | <i>O. sibirica, A. major</i>                     | This study |
| L530_Am1 | GCCTTCCATTTYATCCTRCCATTCAT  | <i>O. sibirica, A. major</i>                     | This study |
| H932_Am1 | GCGGAAGATYATGCTTCGTTGTT     | <i>O. sibirica, A. major</i>                     | This study |
| L430_Am1 | CCGTTATYACYAACCTCCTATCAGC   | <i>Allactaga major</i>                           | This study |
| H751_Am2 | CTGGTGTRTAGTTGTCTGGGTCTC    | <i>Allactaga major</i>                           | This study |

---

## **Phylogenetic reconstructions**

### *Nuclear genes: combined data*

Maximum parsimony reconstructions were performed in PAUP\* 4.0b10<sup>28</sup>. The dataset included an additional matrix of binary characters corresponding to parsimony-informative indels. To reconstruct the optimum trees, heuristic searches were run with the starting tree obtained via stepwise addition, with random addition of sequences and 20 replicates. Tree-bisection-reconnection was used as the branch-swapping algorithm. To assess clade stability, 1000 bootstrap pseudoreplicates were analysed using the same options as above, but with 50 random addition replicates and 'Multrees' not invoked. Maximum likelihood (ML) reconstructions were conducted in IQTREE version 1.6<sup>29</sup>. The ModelFinder routine<sup>30</sup> was used to determine the optimum partitioning strategy and best-fit substitution models for each subset under the BIC criterion. At the initial stage, all gene × codon position combinations were treated as independent subsets. Both edge-linked proportional and edge-unlinked partition models were tested. BIC value was lower for the former; therefore, all subsequent analyses were performed assuming proportional branch lengths among subsets (for more details on partitioning, see Supplementary Table S5). Branch support was evaluated using Ultrafast Bootstrap<sup>31</sup> with 10,000 replicates and branch-wise approximate likelihood ratio test (SH-aLRT<sup>32</sup>) with 100,000 replicates.

Bayesian analysis of the nuclear concatenated data was performed in MrBayes 3.2<sup>33</sup> using the same partitioning scheme as in the ML analysis. Substitution models were specified based on the results of ModelFinder, except that all models with more than two rate parameters were set as GTR. Compound Dirichlet priors for branch lengths combined with a gamma prior on the tree length were invoked. All parameters except branch lengths were unlinked across partitions. The analysis included two independent runs of four chains with the default heating scheme. Chain length was set at five million generations with sampling every 2,000 generations. The Tracer 1.7 software<sup>34</sup> was used to check for convergence and determine the necessary burn-in fraction, which was 10% of the chain length. With these settings, the effective sample size exceeded 200 for all estimated parameters.

### *Individual gene analysis*

The ML and Bayesian trees were generated for each individual nuclear gene using IQTREE and MrBayes, correspondingly. For both analyses, partitions were allocated and best-fit models were determined using ModelFinder as described above. In the ML analysis, branch support was estimated using Ultrafast Bootstrap with 10,000 replicates. The Bayesian analysis was run with the chain length of two million generations and sampling frequency of 1,000.

**Supplementary Table S5. Partitioning and models.**

The ModelFinder procedure under edge-linked proportional model partitioned the concatenated nuclear data into 10 subsets varying in substitution rate, rate heterogeneity, and base composition. Four subsets (shown in bold) consisted of the 3<sup>rd</sup> codon positions and intronic sequences, while the other six included only 1<sup>st</sup> and 2<sup>nd</sup> codon positions.

| desig<br>nation | genes / codon positions                           | legth -<br>bp | best-fit model | relative<br>rate | GC<br>content -<br>% |
|-----------------|---------------------------------------------------|---------------|----------------|------------------|----------------------|
| S12             | a2ab_1 cnr1_1 lcat_1 lcat_2                       | 755           | TNe+I          | 0.11             | 52.7                 |
| VS2             | a2ab_2 cnr1_2 acp5_2                              | 558           | F81+F          | 0.08             | 37.8                 |
| <b>F3</b>       | a2ab_3 cmcy_3 cnr1_3                              | 650           | HKY+F+G4       | 1.82             | 76.4                 |
| F12             | apob_1 brca1_1 brca1_2 brca2_1 brca2_2            | 1488          | TPM2+F+G4      | 1.31             | 44.8                 |
| M2              | apob_2 atp7_2 ghr_2 irbp_2 rag1_2 rag2_2 vwf_2    | 2035          | TPM2u+F+I      | 0.44             | 39.9                 |
| <b>MF3</b>      | apob_3 atp7_3 brca1_3 brca2_3 ghr_3 rag2_3 acp5_3 | 1788          | K3Pu+F+G4      | 1.49             | 38.4                 |
| M12             | atp7_1 cmcy_2 rag2_1 crem                         | 1044          | HKY+F+G4       | 0.48             | 45.5                 |
| M1              | cmcy_1 ghr_1 irbp_1 rag1_1 vwf_1 acp5_1           | 1427          | TIM+F+G4       | 0.46             | 59.6                 |
| <b>VF3</b>      | irbp_3 vwf_3                                      | 532           | K3Pu+F+G4      | 3.86             | 74.7                 |
| <b>MS3</b>      | lcat_3 rag1_3 acp5_intron                         | 716           | K2P+I          | 1.33             | 54.2                 |

### *Mitochondrial data: tree reconstructions and distance estimation*

The *cytb* alignment was partitioned by codon position in both ML and Bayesian analyses; the best-fit model selection and support evaluation followed the same routine as with the nuclear genes. We generated the ultrametric tree by invoking a birth-death model and assuming a relaxed lognormal clock model with the mean rate fixed at unity. The analysis in BEAST 1.10 was run for 100 million generations, and parameters were logged to a file at every 50,000<sup>th</sup> step. Convergence and mixing were analyzed via Tracer 1.7.

To test for deviation from base composition homogeneity, the substitution pattern homogeneity test<sup>35</sup> as implemented in Mega 4<sup>36</sup> was performed based on the 3<sup>rd</sup> codon positions. The results demonstrated significant difference in base frequencies both among jerboa subfamilies and between some allactagine species (see Supplementary information below, Table S6, Fig. S1); we thus performed a second round of reconstructions (both ML and Bayesian) based on the alignment containing 3<sup>rd</sup> codon positions recoded into purines and pyrimidines.<sup>3</sup>

### *Species tree reconstructions*

Species tree reconstructions employing a Bayesian coalescent framework were performed in \*BEAST ver 1.8.4<sup>37</sup>. Forty lineages and sublineages of Allactaginae and five outgroups were used as operational taxonomic units (OTUs). Most of these OTUs corresponded to entities identified by the ABGD species delimitation analysis. Units with absent nuclear data were not included. In a few cases, entities with wide distribution range were split into two or more OTUs (e.g. *Pygeretmus pumilio* from Mongolia and Uzbekistan, *Scarturus elater* from N Caucasus and E Kazakhstan).

Two variants of the analysis were performed, differing by the inclusion of the *cytb* alignment. Prior to the analysis, the genotype data on each of the 15 nuclear genes were phased using PHASE software<sup>38</sup> via DNAsp ver.5<sup>39</sup>. In order to accelerate calculations, the number of sequences in the *cytb* alignment was reduced to 280 excluding most of the highly similar sequences of *O. sibirica* and *S. williamsi* (randomly selected among

haplotypes). The *cytb* data for *Scarturus elater zaisanicus* were excluded from the analysis because nuclear and mitochondrial data support conflicting positions for this taxon in relation to *S. e. elater* and *S. e. dzungariae*.

Each individual dataset was partitioned into one to three subsets following the results of ModelFinder analyses of the separate gene alignments. Substitution models were linked across partitions as in the ML analysis. Following the results of the LRT tests, either strict or relaxed lognormal gene-specific clock models were employed. No calibration information was used, and clock rate for *A2AB* was fixed at unity. Trial runs with default priors showed that the chains do not always reach a stationary state even at 500 million generations in length since the algorithm could get 'stuck' in a local optimum. To facilitate convergence, we had to use more informative priors. Prior densities for clock rates or UCLD mean rates of nuclear genes except *A2AB* were modeled using lognormal distributions with means and variances estimated from the posterior distributions produced by the additional BEAST analysis of the concatenated data, which employed the same partitioning scheme as in the species tree analysis. A diffuse uniform distribution bounded by 20 and 300 was applied as the prior for the *cytb* UCLD mean rate. We used non-random starting trees (the species tree and the gene trees) that were constructed based on the ultrametric tree obtained in the concatenated analysis. A birth-death prior for the species tree shape was assumed. We applied the piecewise-linear with constant root population size model with the "species.popMean" parameter set at 0.0001. Default priors were used for all other parameters. Four runs of 500 million generations each were conducted saving every 100,000<sup>th</sup> generation. Parameter convergence was assessed in Tracer 1.7 software<sup>34</sup>. Depending on the convergence of the MCMC trace, 40 to 60% of the chain length was discarded as the burnin. In the combined posterior sample, the effective sample size for all parameters except several "speciesTree.splitPopSize" parameters exceeded 100.

As the second method to infer the species tree, we used ASTRAL ver. 5.7.7<sup>40</sup>. The multilocus bootstrap procedure was employed to account for gene tree estimation error ("-b" option, 1000 replicates). The input consisted of 16 sets of gene trees (3,600 trees each) extracted from the posterior samples generated by MrBayes. The tree sample for *cytb* was reconstructed in a separate analysis in MrBayes based on a reduced sample excluding

specimens with absent nuclear data. A second analysis employed gene bootstrapping ("--gene-only" option) based on the ML gene trees reconstructed by IQTREE.

### *Species delimitation*

Automatic identification of the ‘barcode gap’ was performed using the online ABGD application (<http://www.abi.snv.jussieu.fr/public/abgd/abgdweb.html>) under the default set of parameters using the matrix of uncorrected  $p$ -distances as input. The prior for maximum intraspecific diversity was set to values  $<1\%$ . Single threshold GMYC analysis was performed employing the GMYC web server (<http://species.h-its.org/gmyc/><sup>41</sup> with the Maximum Clade Credibility tree produced by BEAST. The mPTP analysis was conducted based on the ML tree using the online version of the mPTP program (<https://mptp.h-its.org/#/tree>). In all analyses the outgroups were excluded.

### *Variation in base composition of cytb*

Pattern homogeneity tests<sup>35</sup> were performed with 1000 replicates. Only sequences with more than 900 bp were used.  $P$ -values for interspecific comparisons are given in **Table S6**. To visualize variation in the base composition, Principle Component Analysis (PCA) of nucleotide frequencies was conducted in Statistica 7.0 (Statsoft, Inc. 1984-2007). The results are presented in **Fig S1**. The first axis (56.27% of total variation) is positively correlated with C content, the second axis (40.54% of total variation) corresponds to the difference in A and T content. The results demonstrated significant departure from homogeneity both within Allactaginae and among subfamilies. Among outgroups, Cardiocraniinae were the most distant from allactagines ( $P<0.001$  for most comparisons). Within Allactaginae, two groups with deviant base composition were revealed. Sequences of *Allactaga severtzovi* were C-rich and differed significantly from *Scarturus*, *Pygeretmus*, and all outgroups. In contrast to that, sequences of *Scarturus aulacotis* and *S. euphraticus* were T-rich and differed significantly from the majority of allactagine species. Within species, significant differences were extremely rare.



**Figure S2.** Projection of cases onto the plane of the first two principle components. Dotted lines correspond to projections of the input variables (base frequencies).

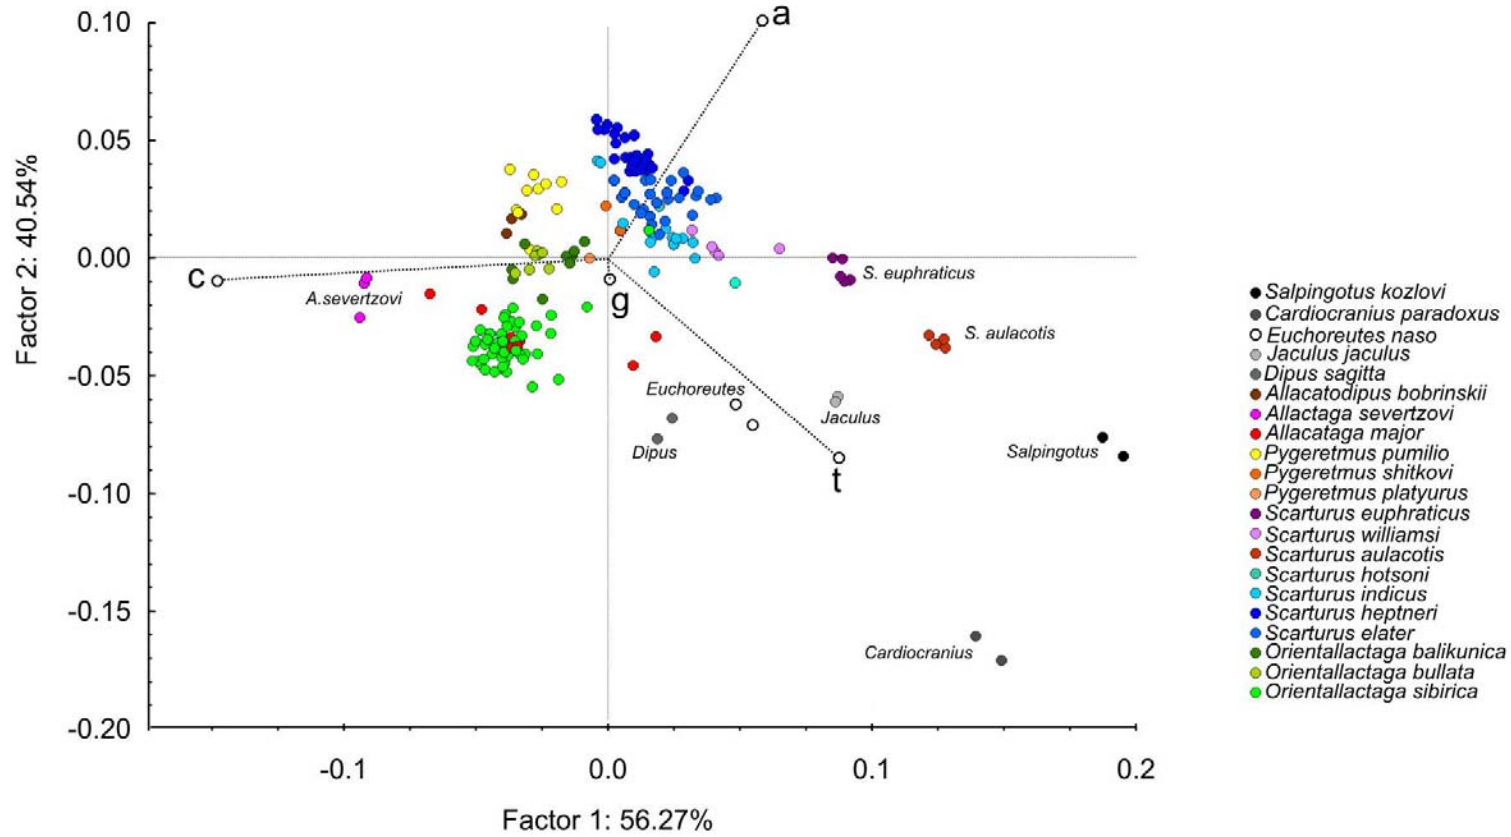

**Table S6. *P*-values for Pattern Homogeneity tests.**

Initially, pairwise tests were performed for 229 sequences of 17 allactagin species and five outgroups. The table contains median *P*-values calculated across all pairwise tests for a given pair of species. Values below 0.01 and 0.05 are marked with red and yellow, respectively.

|                           | Cardiocranius paradoxus | Salpingotus kozlovi | Euchoreutes naso | Jaculus jaculus | Dipus sagitta | Allactodipus bobrinskii | Allactaga severtzovi | Allactaga major | Pygeretmus pumilio | Pygeretmus shikovi | Pygeretmus platyurus | Scarturus aulacotis | Scarturus euphraticus | Scarturus williamsi | Scarturus aff. caprimulga | Scarturus hotsoni | Scarturus indicus | Scarturus heptneri | Scarturus elater | Orientalactaga baikunica | Orientalactaga bullata | Orientalactaga sibirica |
|---------------------------|-------------------------|---------------------|------------------|-----------------|---------------|-------------------------|----------------------|-----------------|--------------------|--------------------|----------------------|---------------------|-----------------------|---------------------|---------------------------|-------------------|-------------------|--------------------|------------------|--------------------------|------------------------|-------------------------|
| Cardiocranius paradoxus   | 1.0000                  |                     |                  |                 |               |                         |                      |                 |                    |                    |                      |                     |                       |                     |                           |                   |                   |                    |                  |                          |                        |                         |
| Salpingotus kozlovi       | 0.0085                  | 1.0000              |                  |                 |               |                         |                      |                 |                    |                    |                      |                     |                       |                     |                           |                   |                   |                    |                  |                          |                        |                         |
| Euchoreutes naso          | 0.0010                  | 0.0000              | 0.3720           |                 |               |                         |                      |                 |                    |                    |                      |                     |                       |                     |                           |                   |                   |                    |                  |                          |                        |                         |
| Jaculus jaculus           | 0.0020                  | 0.0135              | 0.6780           | 1.0000          |               |                         |                      |                 |                    |                    |                      |                     |                       |                     |                           |                   |                   |                    |                  |                          |                        |                         |
| Dipus sagitta             | 0.0001                  | 0.0000              | 1.0000           | 0.1200          | 0.3260        |                         |                      |                 |                    |                    |                      |                     |                       |                     |                           |                   |                   |                    |                  |                          |                        |                         |
| Allactodipus bobrinskii   | 0.0000                  | 0.0000              | 0.0000           | 0.0000          | 0.0080        | 1.0000                  |                      |                 |                    |                    |                      |                     |                       |                     |                           |                   |                   |                    |                  |                          |                        |                         |
| Allactaga severtzovi      | 0.0000                  | 0.0000              | 0.0000           | 0.0000          | 0.0000        | 0.0920                  | 1.0000               |                 |                    |                    |                      |                     |                       |                     |                           |                   |                   |                    |                  |                          |                        |                         |
| Allactaga major           | 0.0000                  | 0.0000              | 0.0285           | 0.0000          | 0.0975        | 0.1260                  | 0.0670               | 0.0915          |                    |                    |                      |                     |                       |                     |                           |                   |                   |                    |                  |                          |                        |                         |
| Pygeretmus pumilio        | 0.0001                  | 0.0000              | 0.0000           | 0.0000          | 0.0050        | 1.0000                  | 0.0440               | 0.0700          | 1.0000             |                    |                      |                     |                       |                     |                           |                   |                   |                    |                  |                          |                        |                         |
| Pygeretmus shikovi        | 0.0000                  | 0.0000              | 0.0145           | 0.0000          | 0.0320        | 1.0000                  | 0.0000               | 0.1135          | 1.0000             | 1.0000             |                      |                     |                       |                     |                           |                   |                   |                    |                  |                          |                        |                         |
| Pygeretmus platyurus      | 0.0000                  | 0.0000              | 0.0220           | 0.0000          | 0.0620        | 1.0000                  | 0.0300               | 0.2250          | 1.0000             | 1.0000             |                      |                     |                       |                     |                           |                   |                   |                    |                  |                          |                        |                         |
| Scarturus aulacotis       | 0.0000                  | 0.0000              | 0.0680           | 0.6805          | 0.0250        | 0.0000                  | 0.0000               | 0.0000          | 0.0000             | 0.0355             | 0.0100               | 1.0000              |                       |                     |                           |                   |                   |                    |                  |                          |                        |                         |
| Scarturus euphraticus     | 0.0015                  | 0.0555              | 0.0780           | 0.3455          | 0.0060        | 0.0000                  | 0.0000               | 0.0000          | 0.0000             | 0.0000             | 0.0000               | 0.2540              | 1.0000                |                     |                           |                   |                   |                    |                  |                          |                        |                         |
| Scarturus williamsi       | 0.0000                  | 0.0000              | 0.0930           | 0.0575          | 0.0655        | 0.0540                  | 0.0000               | 0.0140          | 0.0605             | 1.0000             | 0.1840               | 0.2385              | 0.0130                | 1.0000              |                           |                   |                   |                    |                  |                          |                        |                         |
| Scarturus aff. caprimulga | 0.0000                  | 0.0000              | 0.2310           | 0.1670          | 0.1570        | 0.0270                  | 0.0000               | 0.0260          | 0.0195             | 0.2325             | 0.1110               | 0.2730              | 0.0315                | 1.0000              |                           |                   |                   |                    |                  |                          |                        |                         |
| Scarturus hotsoni         | 0.0000                  | 0.0000              | 0.0325           | 0.0000          | 0.0185        | 0.2290                  | 0.0000               | 0.0490          | 0.3115             | 1.0000             | 1.0000               | 0.0960              | 0.0000                | 1.0000              | 1.0000                    |                   |                   |                    |                  |                          |                        |                         |
| Scarturus indicus         | 0.0000                  | 0.0000              | 0.0690           | 0.0140          | 0.0255        | 0.1690                  | 0.0000               | 0.0410          | 0.2255             | 1.0000             | 0.3150               | 0.0555              | 0.0000                | 1.0000              | 1.0000                    | 1.0000            | 1.0000            |                    |                  |                          |                        |                         |
| Scarturus heptneri        | 0.0000                  | 0.0000              | 0.0000           | 0.0000          | 0.0000        | 0.1850                  | 0.0000               | 0.0180          | 0.2950             | 1.0000             | 0.2380               | 0.0170              | 0.0000                | 0.3100              | 0.0790                    | 1.0000            | 1.0000            | 1.0000             |                  |                          |                        |                         |
| Scarturus elater          | 0.0000                  | 0.0000              | 0.0220           | 0.0000          | 0.0140        | 0.2530                  | 0.0000               | 0.0380          | 0.2785             | 1.0000             | 1.0000               | 0.0420              | 0.0000                | 1.0000              | 0.2450                    | 1.0000            | 1.0000            | 1.0000             | 1.0000           |                          |                        |                         |
| Orientalactaga baikunica  | 0.0000                  | 0.0000              | 0.0225           | 0.0000          | 0.0365        | 1.0000                  | 0.0410               | 0.4040          | 1.0000             | 1.0000             | 1.0000               | 0.0000              | 0.0000                | 0.1340              | 0.1200                    | 1.0000            | 0.3275            | 0.1640             | 0.3280           | 1.0000                   |                        |                         |
| Orientalactaga bullata    | 0.0000                  | 0.0000              | 0.0145           | 0.0000          | 0.0200        | 1.0000                  | 0.0690               | 1.0000          | 1.0000             | 1.0000             | 1.0000               | 0.0000              | 0.0000                | 0.1310              | 0.0490                    | 0.3080            | 0.3440            | 0.1710             | 0.3330           | 1.0000                   | 1.0000                 |                         |
| Orientalactaga sibirica   | 0.0000                  | 0.0000              | 0.0285           | 0.0000          | 0.1290        | 0.3550                  | 0.1310               | 1.0000          | 0.1600             | 0.1775             | 1.0000               | 0.0000              | 0.0000                | 0.0340              | 0.0220                    | 0.1050            | 0.0960            | 0.0250             | 0.0830           | 1.0000                   | 1.0000                 | 1.0000                  |

## Molecular dating

The analyses in BEAST 1.10 were performed using the partitioning scheme and substitution models as inferred via a ModelFinder procedure. The birth-death model was employed as the tree shape prior. Chain length was 100 million generations, and parameters were logged to a file at every 50,000<sup>th</sup> step. Convergence diagnostics were performed via Tracer 1.7<sup>34</sup>, the burn-in fraction was set to 10%, and the effective sample size exceeded 1,000 for all parameters. The maximum clade credibility tree was generated by Tree Annotator 1.10.4 (available in BEAST).

The method of estimation of prior calibration density parameters was executed according to the following steps.

As the first step, the analysis in BEAST was run without calibrations to produce relative split ages (RSA). The UCLD mean rate for the F12 subset was set at 1.0. Diffuse uniform priors (0.0–10.0) were used for the mean rate parameters of all other subsets.

Second, using the RSA produced by BEAST, the empirical scaling factor ( $S = \text{FAD}/\text{RSA}$ ) was calculated for each calibration node, and the node with the largest  $S$  ( $S_{\text{max}}$ ) was identified (see Marshall<sup>42</sup> for details). In this calculation, FAD estimates corresponded to centres of stratigraphic units. We discarded three FADs (*A. major*, *O. sibirica*, *S. cf. williamsi*) that were evidently too young to be informative for calibration (i.e. if the age of the oldest fossil is less than one-half of the expected divergence time of the taxon they represent). In our case,  $S_{\text{max}}$  corresponded to the split between Allactaginae and Euchoreutinae.

Third, according to Solow<sup>43</sup> and Marshall<sup>42,44</sup>, the true age of the node with  $S_{\text{max}}$  can be estimated as  $\text{Td}_{\text{max}} = \text{RSA}_{\text{max}} \times (S_{\text{max}} + \Delta)$ , where  $\Delta$  is a correction term calculated as the average gap size between successive  $S$  values. The latter estimate is unbiased if  $S$  values follow a uniform distribution. Although the exact form of the distribution was unknown, no marked departure from uniform density was evident in our data.

Next, based on the estimated  $\text{Td}_{\text{max}}$ , the ultrametric tree was rescaled, and ages of all calibration nodes were produced, which, in turn, allowed calculation of all absolute and relative ghost lineage times.

Finally, the observed mean ( $M$ ) and standard deviation ( $\sigma$ ) of inferred relative ghost lineage times were used to determine the parameters of calibration densities for each node. The latter were modelled using gamma distribution with  $(M \times FAD + W/2)$  as mean,  $((\sigma \times FAD)^2 + W^2/12)$  as variance, and  $FAD_{\min}$  as offset. Additional components of mean and variance were introduced to account for the dating error with  $W$  being the time span of the stratigraphic zone.

**Supplementary Table S7. The results of clock tests.**

Hierarchical likelihood ratio tests were performed using the ML topology obtained from the concatenated data. All protein-coding genes were partitioned by codon position. GTR+G model was applied to all subsets; rate parameters, base frequencies, substitution rates, and alpha parameters of gamma distributions were unlinked. Degrees of freedom of the chi-square tests were adjusted for the number of identical sequences. Taking into account that low information content in short and slow evolving genes may lead to erroneous acceptance of the strict clock model we used a more liberal rejection criterion  $P \leq 0.1$ .

| <b>Gene</b>  | <b>P</b> | <b>strict clock</b> |
|--------------|----------|---------------------|
| <i>A2AB</i>  | 0.12     | <b>accepted</b>     |
| <i>APOB</i>  | 0.00     | rejected            |
| <i>ATP7</i>  | 0.00     | rejected            |
| <i>BRCA1</i> | 0.01     | rejected            |
| <i>BRCA2</i> | 0.00     | rejected            |
| <i>CMYC</i>  | 0.00     | rejected            |
| <i>CNRI</i>  | 0.17     | <b>accepted</b>     |
| <i>GHR</i>   | 0.01     | rejected            |
| <i>IRBP</i>  | 0.00     | rejected            |
| <i>LCAT</i>  | 0.17     | <b>accepted</b>     |
| <i>RAG1</i>  | 0.10     | rejected            |
| <i>RAG2</i>  | 0.00     | rejected            |
| <i>VWF</i>   | 0.00     | rejected            |
| <i>CREM</i>  | 0.06     | rejected            |
| <i>ACP5</i>  | 0.10     | rejected            |

**Table S8.** Calibrations used for the molecular clock analysis in BEAST. Ages (Mya) are given according to NOW Database (<https://nowdatabase.org/>).

| node                                      | Fossil and its interpretation                                                                                                  | Age       | Reference                                                                       | Calibration density |       |         |                 |
|-------------------------------------------|--------------------------------------------------------------------------------------------------------------------------------|-----------|---------------------------------------------------------------------------------|---------------------|-------|---------|-----------------|
|                                           |                                                                                                                                |           |                                                                                 | offset              | mean  | std.dev | 95% upper bound |
| <i>Dipus / Jaculus</i>                    | earliest <i>Dipus</i> – <i>Dipus sp.</i> in Shala formation, middle Baodean, China,                                            | ~8.2      | <sup>45</sup>                                                                   | 8.2                 | 10.73 | 1.365   | 14.02           |
| <i>Cardiocranium / Salpingotus</i>        | earliest representatives of <i>Salpingotus</i> lineage – <i>S. primitivus</i> , Bahe formation, China                          | 10-12.5   | <sup>46</sup>                                                                   | 10.0                | 13.65 | 1.780   | 17.87           |
| Allactaginae / Dipodinae or Euchoreutinae | earliest Allactaginae - <i>Protalactaga. shevyreva</i> , upper part of the Lower Miocene, Akzhar Formation, Zaisan, Kazakhstan | 16.0–20.0 | <sup>47</sup>                                                                   | 16.0                | 22.22 | 3.096   | 29.59           |
| <i>Allactaga major / A. severtzovi</i>    | <i>Allactaga ukrainica</i> - a species closely related to <i>A. severtzovi</i> from Early Pleistocene, S Ukraine               | 1.72–1.9  | NOW Database<br><a href="https://nowdatabase.org/">https://nowdatabase.org/</a> | 1.72                | 2.30  | 0.295   | 3.00            |

|                                                         |                                                                                                                               |           |               |      |      |       |      |
|---------------------------------------------------------|-------------------------------------------------------------------------------------------------------------------------------|-----------|---------------|------|------|-------|------|
| <i>Pygeretmus / Scarturus</i>                           | earliest <i>Pygeretmus</i> – Late Pliocene, Kiikbay, SE Kazakhstan                                                            | 3.0–3.28  | <sup>48</sup> | 3.0  | 3.99 | 0.511 | 5.21 |
| <i>Pygeretmus ss / Alactagulus</i>                      | earliest <i>Alactagulus Alactagulus</i> indet - Early Pleistocene, Orkhon, Mongolia                                           | 2.18–2.45 | <sup>49</sup> | 2.18 | 2.94 | 0.380 | 3.84 |
| <i>Scarturus elater</i> species group / sister lineages | earliest member of <i>S. elater</i> species group – <i>Allactaga elater</i> - Early Pleistocene, Akkulaevo, Bashkiria, Russia | 2.2–2.5   | <sup>50</sup> | 2.20 | 2.98 | 0.387 | 3.90 |



### **Species distribution modeling (SDM).**

The occurrence records of Allactaginae used in the species distribution modeling (SDM) were obtained from our field observations, ZMMU collections, other collections accessed via the Global Biodiversity Information Facility (GBIF, <https://www.gbif.org>), and literature sources. The environmental data used for SDM were 30 arc-second grids (approximately 1 km resolution) of climate. Current climate data (BioClim 1-19) were obtained from WORLDCLIM Version 2.0<sup>43</sup>; paleo-climate data for intervals 20–5,400 kya were obtained from Oscillayers dataset<sup>44</sup>. Paleo-climate data originally available at 2.5 arc-minutes were upscaled to 30 arc-second.

The extent of the study area or of the "landscape of interest" significantly affects SDM results<sup>46,47</sup>. To define the study area of a species, we clipped environmental variables using rectangle mask covering the area of occurrence points plus 3 degrees in each direction. The model for current environments was constructed with default MAXENT settings, as these were demonstrated to be the most appropriate for wide-ranging data<sup>48</sup>. We used the MAXENT logistic output, which provides estimates of relative habitat suitability<sup>51</sup>. To estimate the model's performance, we used the area under the Receiver Operating Characteristic curve (AUC) test, which is an extensively used measure in species distribution modeling<sup>52</sup>. Since most bioclimatic variables are intercorrelated we aimed to avoid overprediction and therefore calculated the matrix of pair-wise correlations of 19 bio-climatic variables for each study area using "Band Collection Statistics" tool from the standard Arc Toolbox, Spatial Analyst Tools (ArcGIS Desktop 10.8.1). We chose a pair of variables with the highest value of correlation coefficients, built two models each with one of these variables removed, estimated the model's performance using the AUC test, and excluded the variable associated with a lower AUC value. This procedure was repeated with the next pairs of highly correlated variables and was stopped when removal of a variable from the model resulted in an abrupt decline of the AUC value. Models with reduced sets of environmental variables for current time were projected onto the paleo-environmental data sets. For each node, we used divergence time intervals estimated from molecular dating with 50 kyr added to maximal and minimal values. Within these time intervals, we got the set of models of relative habitat suitability (RHS) for each 10 kyr. To define the areas of real species occurrence,

the original model values, ranging continuously from 0 to 1, were transformed to a binary 0 or 1 using a threshold value. The threshold value was chosen to be equal to the “maximum training sensitivity plus specificity”; this threshold was experimentally demonstrated to provide optimal results<sup>49</sup>. Within each of the analyzed time periods estimated by genetic analysis as the time of branching of genetic lineages, SDM revealed episodes of ancestor’s geographic range fragmentations that can be interpreted as isolation leading to speciation. This result can validate the use of the chosen approach.

**Figure S3.** Bayesian phylogeny of Allactaginae based on the concatenated alignment of nuclear genes. Values above the branches correspond to the posterior probabilities in Bayesian and bootstrap support in the ML and MP analyses, respectively (BI/ML/MP).

BI/ML/MP

0.97/96/66

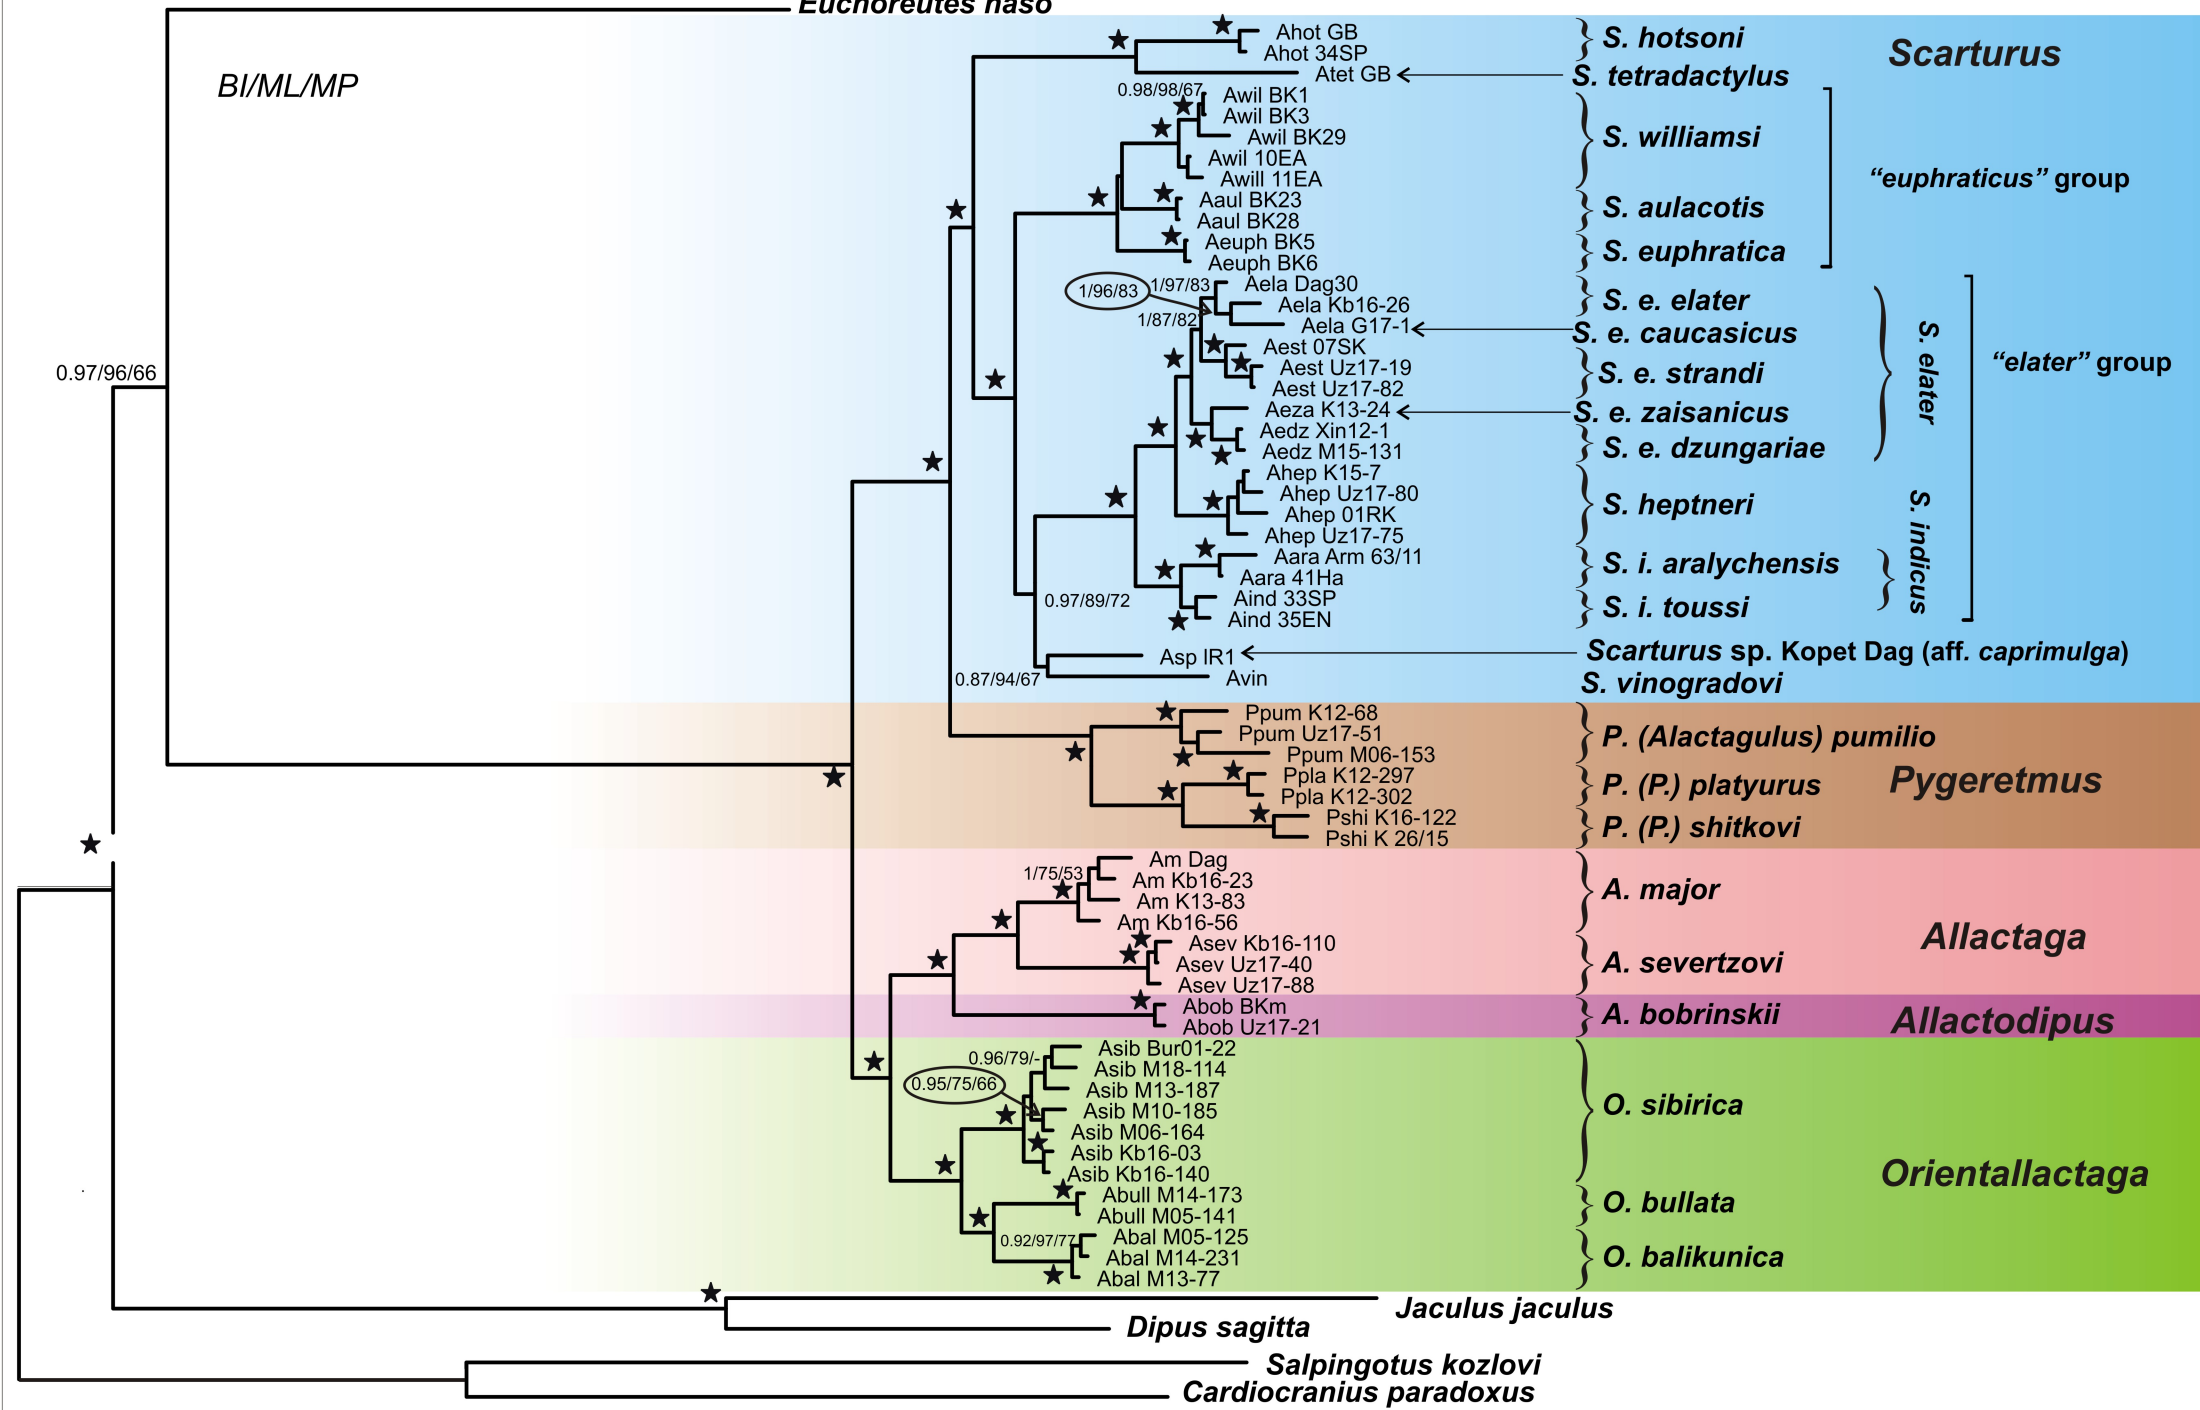

- Ahot GB
- Ahot 34SP
- Atet GB ←
- 0.98/98/67
- Awil BK1
- Awil BK3
- Awil BK29
- Awil 10EA
- Awil 11EA
- Aaul BK23
- Aaul BK28
- Aeuph BK5
- Aeuph BK6
- 1/96/83
- 1/97/83
- Aela Dag30
- Aela Kb16-26
- Aela G17-1 ←
- 1/87/82
- Aest 07SK
- Aest Uz17-19
- Aest Uz17-82
- Aeza K13-24 ←
- Aedz Xin12-1
- Aedz M15-131
- Ahep K15-7
- Ahep Uz17-80
- Ahep 01RK
- Ahep Uz17-75
- Aara Arm 63/11
- Aara 41Ha
- 0.97/89/72
- Aind 33SP
- Aind 35EN
- 0.87/94/67
- Asp IR1 ←
- Avin
- Ppum K12-68
- Ppum Uz17-51
- Ppum M06-153
- Ppla K12-297
- Ppla K12-302
- Pshi K16-122
- Pshi K 26/15
- 1/75/53
- Am Dag
- Am Kb16-23
- Am K13-83
- Am Kb16-56
- Asev Kb16-110
- Asev Uz17-40
- Asev Uz17-88
- Abob BKm
- Abob Uz17-21
- 0.96/79/-
- 0.95/75/66
- Asib Bur01-22
- Asib M18-114
- Asib M13-187
- Asib M10-185
- Asib M06-164
- Asib Kb16-03
- Asib Kb16-140
- Abull M14-173
- Abull M05-141
- 0.92/97/77
- Abal M05-125
- Abal M14-231
- Abal M13-77

*S. hotsoni*

*S. tetradactylus*

*S. williamsi*

*S. aulacotis*

*S. euphratica*

*S. e. elater*

*S. e. caucasicus*

*S. e. strandi*

*S. e. zaisanicus*

*S. e. dzungariae*

*S. heptneri*

*S. i. aralychensis*

*S. i. toussi*

*Scarturus* sp. Kopet Dag (aff. *caprimulga*)

*S. vinogradovi*

*P. (Alactagulus) pumilio*

*P. (P.) platyurus*

*P. (P.) shitkovi*

*A. major*

*A. severtzovi*

*A. bobrinskii*

*O. sibirica*

*O. bullata*

*O. balikunica*

*Jaculus jaculus*

*Dipus sagitta*

*Salpingotus kozlovi*

*Cardiocranium paradoxus*

**Scarturus**

"euphraticus" group

*S. elater*

"elater" group

*S. indicus*

**Pygeretmus**

**Allactaga**

**Allactodipus**

**Orientallactaga**

**Figure S4.** Maximum likelihood phylogeny of the Allactaginae based on the *cytb* gene sequences. Values above the branches correspond to the posterior probabilities and bootstrap support (1,000 pseudoreplicates) in the BI and ML analyses, respectively. The results of ABGD species delimitation analysis are shown to the right.

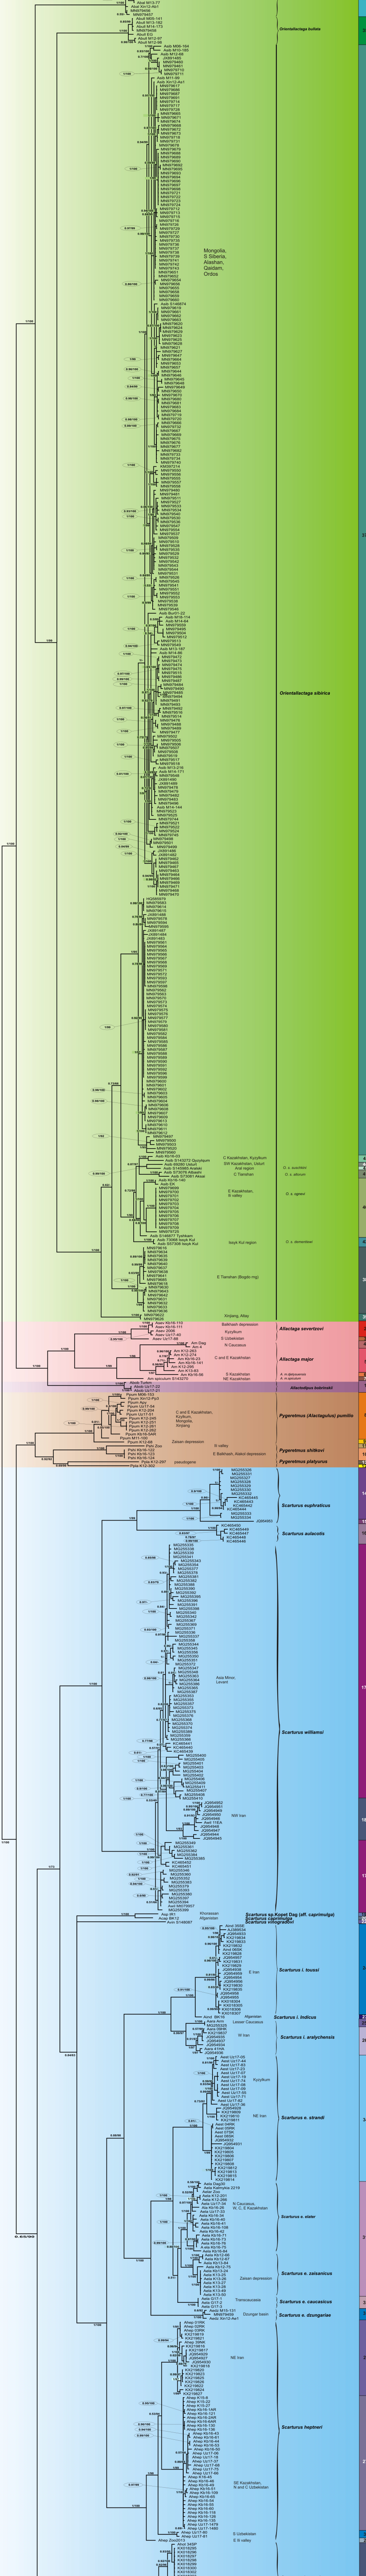

*Orientalactaga balkunica* 36  
*Orientalactaga bullata* 35  
*Orientalactaga sibirica* 37  
*Allactaga severtzovi* 39  
*Allactaga major* 5  
*Allactodipus bobrinski* 1  
*Pygeretmus (Alactagulus) pumilio* 8  
*Pygeretmus shitkovi* 9  
*Pygeretmus platyurus* 10  
*Scarturus euphraticus* 14  
*Scarturus aulacotis* 16  
*Scarturus williamsi* 17  
*Scarturus sp. Kopet Dag (aff. caprimulgus)* 18  
*Scarturus vigradovi* 19  
*Scarturus i. toussi* 24  
*Scarturus i. indicus* 25  
*Scarturus i. aralychensis* 26  
*Scarturus e. strandi* 34  
*Scarturus e. zaisanicus* 31  
*Scarturus e. caucasicus* 32  
*Scarturus e. dzungariae* 33  
*Scarturus heptneri* 27  
*Scarturus hotsoni* 21

**Figure S5.** Species tree of Allactaginae produced by the \*BEAST algorithm using the Bayesian multispecies coalescent approach (**A**) and derived from ASTRAL algorithm (**B**). In Fig. S4A, numbers at nodes denote posterior probabilities in \*BEAST. In Fig. S4B, numbers at nodes correspond to consensus scores obtained using posterior samples from MrBayes (left) and with gene bootstrapping based on ML gene trees (right).







**Figure S6.** Plot of *cytb* sequence divergence (Y-axis) against node ages inferred from nuclear data (X-axis). Both X and Y values were obtained via corresponding analyses in BEAST 1.10. The red line shows the non-linear regression curve obtained with the use of non-linear estimation module in Statistica 7.0. A polynomial model was used:  $Y = aX + bX^2 + c$ . The following values of coefficients were obtained:  $a = 0.078842$ ,  $b = -0.004852$ ,  $c = 0.010153$ . Both  $a$  and  $b$  are significantly different from zero ( $P = 0.0000$  and  $P = 0.027$ , respectively); thus, indicating non-linear relationship between time and *cytb* divergence. This effect can be explained by the *cytb* sequence saturation that is not corrected for by the available substitution models. For the oldest split, the node height in the *cytb* tree is underestimated by more than 40%.

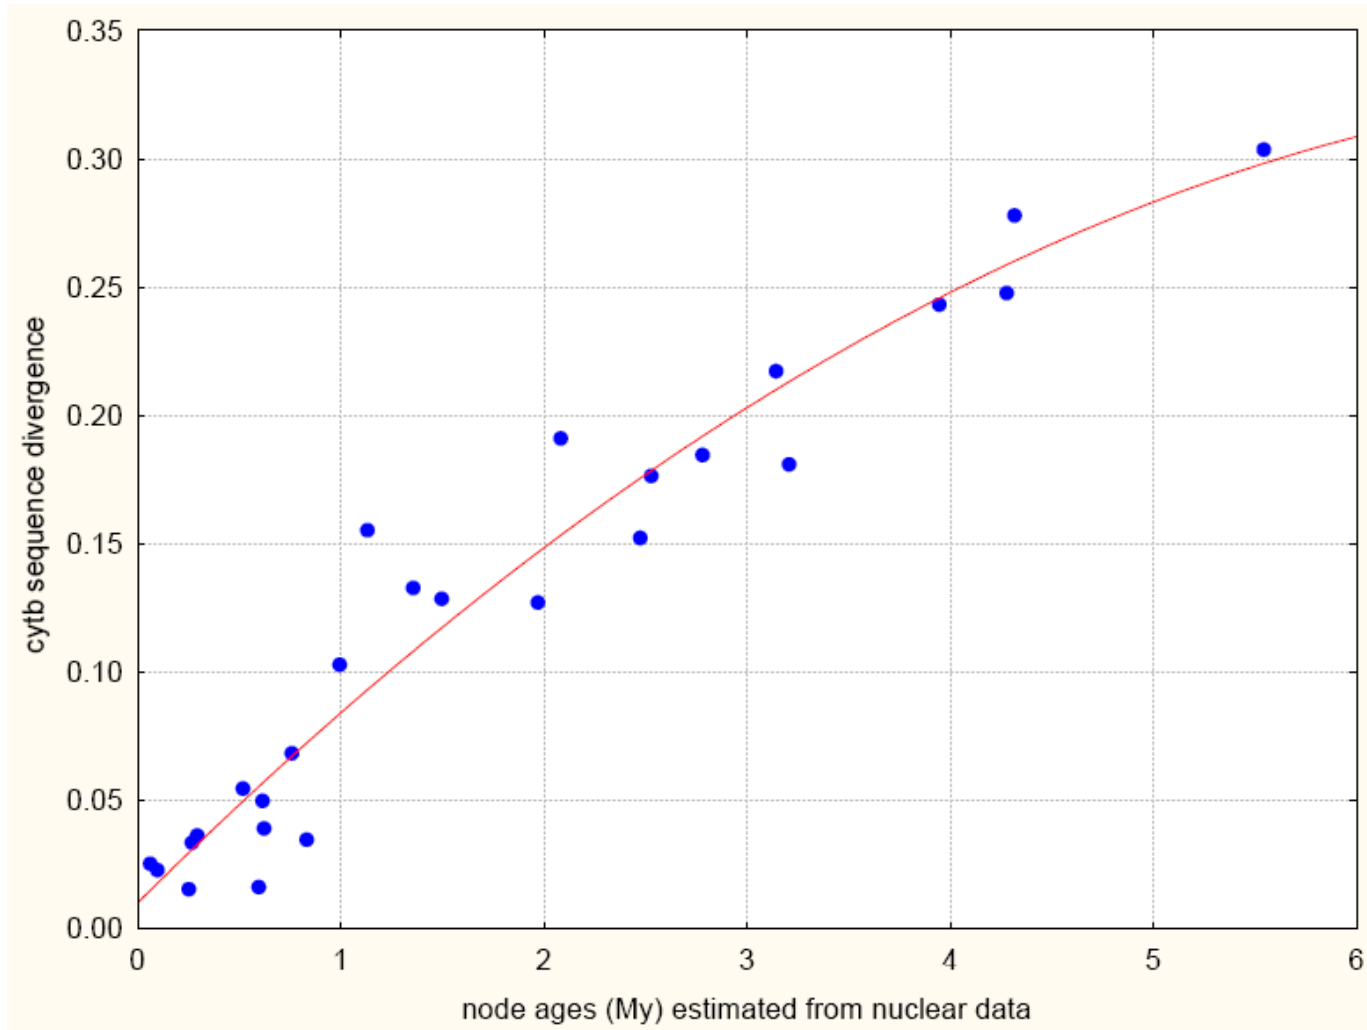

## Supplementary information. ABGD results

### Description of sequence groups as recognized by the ABGD procedures

1. *Allactodipus bobrinskii*
2. *Allactaga severtzovi* – N Uzbekistan, Balkhash depression
3. *Allactaga severtzovi* - S Uzbekistan
4. *Allactaga major* – N Caucasus
5. *Allactaga major* – C,E Kazakhstan
6. *Allactaga major djetyssuensis* - SE Kazakhstan
7. *Allactaga major spiculum* – NE Kazakhstan – N of Irtysh
8. *Pygeretmus pumilio* - most of the range in W and E Central Asia
9. *Pygeretmus pumilio* - Zaisan depression
10. *Pygeretmus shitkovi* - E Balkhash depression
11. *Pygeretmus shitkovi* - E Ili valley
12. *Pygeretmus platyurus*
13. *Pygeretmus platyurus putative pseudogene*
14. *Scarturus euphraticus* - most of the range
15. *Scarturus euphraticus* - Iran
16. *Scarturus aulacotis*
17. *Scarturus williamsi* - most of the range
18. *Scarturus williamsi* - NW Iran
19. *Scarturus aff. caprimulga* - Kopet Dag
20. *Scarturus caprimulga* - Afganistan
21. *Scarturus hotsoni*
22. *Scarturus vinogradovi*
23. *Scarturus indicus s.str.* - Afganistan
24. *Scarturus indicus toussi* - Iran
25. *Scarturus (i.) aralychensis* - Lesser Caucasus
26. *Scarturus (i.) aralychensis* - Iran
27. *Scarturus heptneri* - SE Kazakhstan, N,C Uzbekistan
28. *Scarturus heptneri* - E Ili valley

29. *Scarturus heptneri* - NE Iran
30. *Scarturus heptneri* - S Uzbekistan
31. *Scarturus elater sensu stricto* - most of the range in SE Europe, N Caucasus, W,C,E Kazakhstan including Zaisan depression
32. *Scarturus e. caucasicus* - Transcaucasia
33. *Scarturus (e.) dzungariae* - Dzungar basin
34. *Scarturus (e.) strandi* - Uzbekistan, Turkmenistan, NE Iran
35. *Orientallactaga bullata*
36. *Orientallactaga balikunica*
37. *Orientallactaga sibirica* - E Central Asia
38. *Orientallactaga sibirica* - Bogdo mnts
39. *Orientallactaga sibirica* - Altay
40. *Orientallactaga sibirica ognevi* - E Kazakhstan
41. *Orientallactaga sibirica altorum* - C Tianshan
42. *Orientallactaga sibirica dementiewi* - Issyk Kul region
43. *Orientallactaga sibirica* - C Kazakhstan, Kyzylkum
44. *Orientallactaga sibirica* – SW Kazakhstan
45. *Orientallactaga sibirica suschkini*– Aral region

**Table S9. Divergence times of Allactaginae as estimated by BEAST based on nuclear concatenation.**

| Tmrca                                    | UCLD         |         |       | RLC_poisson  |         |       |
|------------------------------------------|--------------|---------|-------|--------------|---------|-------|
|                                          | median       | 95% HPD |       | median       | 95% HPD |       |
| Dipodidae                                | <b>21.05</b> | 18.95   | 23.38 | <b>21.59</b> | 19.58   | 23.49 |
| Cardiocaniinae                           | <b>12.69</b> | 10.85   | 14.69 | <b>13.49</b> | 11.94   | 15.09 |
| Dipodinae + sister group                 | <b>18.96</b> | 17.35   | 20.91 | <b>19.27</b> | 17.69   | 21.07 |
| <i>Dipus+Jaculus</i>                     | <b>9.51</b>  | 8.49    | 10.75 | <b>9.23</b>  | 8.35    | 10.14 |
| <i>Euchoreutes</i> + Allactaginae        | <b>17.94</b> | 16.52   | 19.80 | <b>18.13</b> | 16.49   | 19.64 |
| Allactaginae                             | <b>5.54</b>  | 4.88    | 6.29  | <b>5.69</b>  | 5.09    | 6.36  |
| <i>Orientallactaga+Allactaga</i>         | <b>4.28</b>  | 3.64    | 4.99  | <b>4.37</b>  | 3.78    | 4.92  |
| <i>Alactodipus</i> + <i>Allactaga</i>    | <b>3.21</b>  | 2.65    | 3.77  | <b>3.28</b>  | 2.85    | 3.78  |
| <i>Allactaga</i>                         | <b>1.97</b>  | 1.71    | 2.33  | <b>2.01</b>  | 1.73    | 2.34  |
| <i>A. severtzovi</i>                     | <b>0.06</b>  | 0.00    | 0.21  | <b>0.06</b>  | 0.00    | 0.21  |
| <i>Orientallactaga</i>                   | <b>2.08</b>  | 1.60    | 2.65  | <b>2.17</b>  | 1.76    | 2.68  |
| <i>O. bullata</i> + <i>O. balikunica</i> | <b>1.50</b>  | 1.08    | 1.95  | <b>1.54</b>  | 1.19    | 1.97  |
| <i>O. sibirica</i>                       | <b>0.52</b>  | 0.32    | 0.74  | <b>0.55</b>  | 0.36    | 0.78  |
| <i>Pygeretmus</i> + <i>Scarturus</i>     | <b>4.32</b>  | 3.81    | 4.87  | <b>4.48</b>  | 4.01    | 5.00  |
| <i>Pygeretmus</i>                        | <b>2.53</b>  | 2.22    | 2.90  | <b>2.57</b>  | 1.73    | 2.34  |
| <i>P. pumilio</i>                        | <b>0.83</b>  | 0.57    | 1.14  | <b>0.85</b>  | 0.58    | 1.12  |

|                                                                                     |             |      |      |             |      |      |
|-------------------------------------------------------------------------------------|-------------|------|------|-------------|------|------|
| <i>P. pumilio</i> except Zaisan                                                     | <b>0.60</b> | 0.33 | 0.84 | <b>0.60</b> | 0.39 | 0.87 |
| <i>P. platyurus</i> + <i>P. shitkovi</i>                                            | <b>1.36</b> | 1.05 | 1.70 | <b>1.39</b> | 1.10 | 1.69 |
| <i>P. shitkovi</i>                                                                  | <b>0.29</b> | 0.11 | 0.51 | <b>0.30</b> | 0.12 | 0.50 |
| <i>Scarturus</i>                                                                    | <b>3.95</b> | 3.46 | 4.48 | <b>4.10</b> | 3.65 | 4.67 |
| <i>S. hotsoni</i> + <i>S. tetradactylus</i>                                         | <b>1.84</b> | 1.33 | 2.44 | <b>1.90</b> | 1.44 | 2.46 |
| VECE clade ( <i>Scarturus</i> without <i>S. hotsoni</i> & <i>S. tetradactylus</i> ) | <b>3.14</b> | 2.75 | 3.61 | <b>3.21</b> | 2.84 | 3.69 |
| <i>S. euphraticus</i> species group                                                 | <b>1.13</b> | 0.84 | 1.45 | <b>1.21</b> | 0.93 | 1.49 |
| <i>S. williamsi</i>                                                                 | <b>0.27</b> | 0.10 | 0.44 | <b>0.29</b> | 0.14 | 0.49 |
| <i>S. vinogradovi</i> + <i>S. caprimulga</i> + <i>S. elater</i>                     | <b>2.78</b> | 2.40 | 3.20 | <b>2.85</b> | 2.49 | 3.26 |
| <i>S. vinogradovi</i> + <i>S. caprimulga</i>                                        | <b>2.47</b> | 1.89 | 3.00 | <b>2.49</b> | 1.89 | 2.95 |
| <i>S. elater</i> species group                                                      | <b>1.50</b> | 1.20 | 1.82 | <b>1.51</b> | 1.18 | 1.80 |
| <i>S. indicus</i>                                                                   | <b>0.61</b> | 0.40 | 0.90 | <b>0.64</b> | 0.39 | 0.89 |
| <i>S.i.aralychensis</i>                                                             | <b>0.10</b> | 0.00 | 0.25 | <b>0.10</b> | 0.00 | 0.27 |
| <i>S. elater</i> + <i>S. heptneri</i>                                               | <b>0.99</b> | 0.77 | 1.23 | <b>1.01</b> | 0.78 | 1.26 |
| <i>S. elater</i> ss + <i>S. e. dzungariae</i>                                       | <b>0.76</b> | 0.58 | 0.97 | <b>0.78</b> | 0.58 | 0.99 |
| <i>S. elater</i> ss + <i>S. e.strandi</i>                                           | <b>0.62</b> | 0.45 | 0.81 | <b>0.64</b> | 0.47 | 0.84 |
| <i>S. e.strandi</i>                                                                 | <b>0.25</b> | 0.10 | 0.43 | <b>0.26</b> | 0.11 | 0.44 |

UCLD – relaxed uncorrelated lognormal clock model. RLC\_poisson – Bayesian random local clocks with Poisson process for rate variation

All values are corrected for ancestral polymorphism using 0.15 My as the average allele coalescence time.

**Table S10. Taxonomic changes in Allactaginae Vinogradov, 1925.**

The names of taxa which status has changed compared to the latest revision are given in red. According to the taxonomy suggested in the current study *Allactaga* (*major*) *spiculum*, *Scarturus* (*elater*) *strandii*, *Scarturus* (*elater*) *dzungariae*, and *Scarturus* (*indicus*) *aralychensis* are regarded as semispecies (species in statu nascendi). Question marks indicate taxa which taxonomic status requires additional study. Names of valid genera are shown in bold. The name "Microallactaga" Shenbrot, 1974 is a nomen nudum. Species allocated to the genera *Allactaga*, *Orientallactaga*, and *Scarturus* are marked with colors (yellow, grey, and green, respectively).

| Suggested taxonomy<br>5 genera, 19 species and 4 semispecies                                                                                                                                                                                                                                                                                                                                                                                                                                                                                                                                                                                                                                                                                                                                                                                                                                                                                                                                                                                                   | Michaux & Shenbrot, 2017 <sup>53</sup><br>Lebedev et al., 2013 <sup>15</sup> genera,<br>16 species                                                                                                                                                                                                                                                                                                                                                                                                                                                                                                                                                                                                                                                                          | MSW3:<br>Holden, Musser, 2005 <sup>54</sup><br>3 genera, 16 species                                                                             | Shenbrot et al., 1995 <sup>55</sup><br>3 genera, 13 species                                                                                                                                                                                                                                                                                                                                                                                                                                       | Ognev, 1948 <sup>56</sup><br>4 genera, 10 species                                                                                                                                                                                                                                                                                                                         | Vinogradov, 1937 <sup>57</sup><br>4 genera, 12 species                                                                                                                                                |
|----------------------------------------------------------------------------------------------------------------------------------------------------------------------------------------------------------------------------------------------------------------------------------------------------------------------------------------------------------------------------------------------------------------------------------------------------------------------------------------------------------------------------------------------------------------------------------------------------------------------------------------------------------------------------------------------------------------------------------------------------------------------------------------------------------------------------------------------------------------------------------------------------------------------------------------------------------------------------------------------------------------------------------------------------------------|-----------------------------------------------------------------------------------------------------------------------------------------------------------------------------------------------------------------------------------------------------------------------------------------------------------------------------------------------------------------------------------------------------------------------------------------------------------------------------------------------------------------------------------------------------------------------------------------------------------------------------------------------------------------------------------------------------------------------------------------------------------------------------|-------------------------------------------------------------------------------------------------------------------------------------------------|---------------------------------------------------------------------------------------------------------------------------------------------------------------------------------------------------------------------------------------------------------------------------------------------------------------------------------------------------------------------------------------------------------------------------------------------------------------------------------------------------|---------------------------------------------------------------------------------------------------------------------------------------------------------------------------------------------------------------------------------------------------------------------------------------------------------------------------------------------------------------------------|-------------------------------------------------------------------------------------------------------------------------------------------------------------------------------------------------------|
| <b><i>Allactaga</i></b> Cuvier, 1836<br><i>A. major</i> (Kerr, 1792)<br><i>A. m. major</i><br><i>A. m. djetyysuensis</i> Shenbrot, 1991<br>? <i>A. m. ssp</i> (western part of the range)<br><b><i>A. (m.) spiculum</i></b> (Lichtenstein, 1825)<br><i>A. severtzovi</i> Vinogradov, 1925<br><i>A. s. severtzovi</i> (including <i>A. s. chorezmi</i> )<br>? <i>A. s. ssp</i> (S Uzbekistan)                                                                                                                                                                                                                                                                                                                                                                                                                                                                                                                                                                                                                                                                   | <b><i>Allactaga</i></b><br><i>A. major</i><br><i>A. m. major</i><br><i>A. m. spiculum</i><br><i>A. m. djetyysuensis</i><br><i>A. severtzovi</i><br><i>A. s. severtzovi</i><br><i>A. s. chorezmi</i> Shenbrot, 1993                                                                                                                                                                                                                                                                                                                                                                                                                                                                                                                                                          | <b><i>Allactaga</i></b><br>subgenus <b><i>Allactaga</i></b><br><i>A. (A.) major</i><br><i>A. (A.) severtzovi</i>                                | <b><i>Allactaga</i></b><br>subgenus <b><i>Allactaga</i></b><br><i>A. (A.) major</i><br><i>A. m. major</i><br><i>A. m. djetyysuensis</i><br><i>A. m. spiculum</i><br><i>A. (A.) severtzovi</i><br><i>A. s. severtzovi</i><br><i>A. s. chorezmi</i>                                                                                                                                                                                                                                                 | <b><i>Allactaga</i></b><br>subgenus <b><i>Allactaga</i></b><br><i>A. (A.) jaculus</i> Pallas, 1778<br>(= <i>major</i> )<br><i>A. j. jaculus</i><br><i>A. j. fuscus</i> Ognev, 1924<br><i>A. j. decumanus</i> Lichtenstein, 1825<br><i>A. j. intermedius</i> Ognev, 1948<br><i>A. j. vexillarius</i> Eversmann, 1840<br><i>A. j. spiculum</i><br><i>A. (A.) severtzovi</i> | <b><i>Allactaga</i></b><br><i>A. jaculus</i><br><i>A. severtzovi</i>                                                                                                                                  |
|                                                                                                                                                                                                                                                                                                                                                                                                                                                                                                                                                                                                                                                                                                                                                                                                                                                                                                                                                                                                                                                                |                                                                                                                                                                                                                                                                                                                                                                                                                                                                                                                                                                                                                                                                                                                                                                             | <i>A. (A.) elater</i><br><i>A. (A.) vinogradovi</i><br><i>A. (A.) firouzi</i><br><i>A. (A.) hotsoni</i>                                         | <i>A. (A.) elater</i><br><i>elater</i> subspecies group<br><i>A. e. elater</i><br><i>A. e. caucasicus</i><br><i>A. e. dzungariae</i><br><i>A. e. zaisanicus</i><br><i>indica</i> subspecies group<br><i>S. e. indica</i><br><i>A. e. turkmeni</i> Goodwin, 1940<br><i>A. e. aralychensis</i><br><i>A. (A.) vinogradovi</i><br><i>A. (A.) hotsoni</i> (including <i>firouzi</i> )                                                                                                                  | <i>A. (A.) elater</i> Lichtenstein, 1825<br><i>A. e. elater</i><br><i>A. e. strandii</i><br><i>A. e. aralychensis</i><br><i>A. e. caucasicus</i><br><i>A. e. kizljarius</i> Satunin, 1907<br><i>A. e. dzungariae</i><br><i>A. e. vinogradovi</i>                                                                                                                          | <i>A. elater</i><br><i>A. e. elater</i><br><i>A. e. kizljarius</i><br><i>A. e. aralychensis</i><br><i>A. e. caucasicus</i><br><i>A. e. strandii</i><br><i>A. e. dzungariae</i><br><i>A. e. indica</i> |
|                                                                                                                                                                                                                                                                                                                                                                                                                                                                                                                                                                                                                                                                                                                                                                                                                                                                                                                                                                                                                                                                |                                                                                                                                                                                                                                                                                                                                                                                                                                                                                                                                                                                                                                                                                                                                                                             | subgenus <b><i>Paralactaga</i></b><br><b><i>Allactaga</i></b> ( <i>P.</i> ) <b><i>euphratica</i></b><br><i>A. (P.) williamsii</i>               | subgenus <b><i>Paralactaga</i></b><br><b><i>Allactaga</i></b> ( <i>P.</i> ) <b><i>euphratica</i></b><br><i>A. e. euphratica</i><br><i>A. e. williamsii</i><br><i>A. e. caprimulga</i>                                                                                                                                                                                                                                                                                                             | <i>A. (A.) williamsii</i>                                                                                                                                                                                                                                                                                                                                                 | <i>A. williamsii</i><br><i>A. euphratica</i><br><i>A. hotsoni</i>                                                                                                                                     |
| <b><i>Orientallactaga</i></b> Shenbrot, 1984<br><i>O. sibirica</i> (Forster, 1778)<br><i>O. sibirica</i> semispecies or subspecies group ("eastern")<br><i>O. s. sibirica</i><br><i>O. s. saltator</i> (Eversmann, 1848)<br><i>O. s. annulata</i> (Milne-Edwards, 1867)<br><i>O. s. longior</i> (G. S. Miller, 1911)<br><i>O. s. bulganensis</i> (Shenbrot, 1991)<br>? <i>O. s. ssp</i> (see Cheng et al., 2020)<br><i>O. suschkini</i> semispecies or subspecies group ("western")<br><i>O. s. suschkini</i> (Satunin, 1900)<br>? <i>O. s. rueckbeili</i> (Thomas, 1914)<br><i>O. s. altorum</i> (Ognev, 1946)<br><i>O. s. dementiewi</i> (Toktosunov, 1958)<br><i>O. s. ognevi</i> (Shenbrot, 1991)<br><i>O. balikunica</i> (Hsia and Fang, 1964)<br><i>O. bullata</i> (G. M. Allen, 1925)                                                                                                                                                                                                                                                                   | <b><i>Orientallactaga</i></b><br><i>O. sibirica</i><br><i>O. s. sibirica</i><br><i>O. s. altorum</i><br><i>O. s. bulganensis</i><br><i>O. s. dementiewi</i><br><i>O. s. longior</i><br><i>O. s. ognevi</i><br><i>O. s. rueckbeili</i><br><i>O. s. saltator</i><br><i>O. s. suschkini</i><br><i>O. balikunica</i><br><i>O. bullata</i>                                                                                                                                                                                                                                                                                                                                                                                                                                       | subgenus <b><i>Orientallactaga</i></b><br><i>Allactaga</i> ( <i>O.</i> ) <i>sibirica</i><br><i>A. (O.) bullata</i><br><i>A. (O.) balikunica</i> | subgenus <b><i>Orientallactaga</i></b><br><i>Allactaga</i> ( <i>O.</i> ) <i>sibirica</i><br><i>sibirica</i> subspecies group<br><i>A. s. sibirica</i><br><i>A. s. altorum</i><br><i>A. s. ognevi</i><br><i>A. s. rueckbeili</i><br><i>A. s. longior</i><br><i>saltator</i> subspecies group<br><i>A. s. saltator</i><br><i>A. s. bulganensis</i><br><i>A. s. dementiewi</i><br><i>suschkini</i> subspecies group<br><i>A. s. suschkini</i><br><i>A. (O.) balikunica</i><br><i>A. (O.) bullata</i> | <i>A. (A.) sibirica</i><br><i>A. s. sibirica</i><br><i>A. s. altorum</i><br><i>A. s. semideserta</i> Bannikov, 1947<br><i>A. s. rueckbeili</i><br><i>A. s. saltator</i><br><i>A. s. suschkini</i><br><i>A. bullata</i>                                                                                                                                                    | <i>A. saltator</i><br><i>A. s. saltator</i><br><i>A. s. suschkini</i><br><i>A. s. mongolica</i> Radde, 1861<br><i>A. s. annulata</i><br><br><i>A. bullata</i>                                         |
| <b><i>Allactodipus</i></b> Kolesnikov, 1937<br><i>A. bobrinskii</i> Kolesnikov, 1937                                                                                                                                                                                                                                                                                                                                                                                                                                                                                                                                                                                                                                                                                                                                                                                                                                                                                                                                                                           | <b><i>Allactodipus</i></b><br><i>A. bobrinskii</i>                                                                                                                                                                                                                                                                                                                                                                                                                                                                                                                                                                                                                                                                                                                          | <b><i>Allactodipus</i></b><br><i>A. bobrinskii</i>                                                                                              | <b><i>Allactodipus</i></b><br><i>A. bobrinskii</i>                                                                                                                                                                                                                                                                                                                                                                                                                                                | subgenus <b><i>Allactodipus</i></b><br><i>Allactaga</i> ( <i>Allactodipus</i> ) <i>bobrinskii</i>                                                                                                                                                                                                                                                                         | <b><i>Scarturus</i></b><br><i>S. tetradactylus</i>                                                                                                                                                    |
| <b><i>Scarturus</i></b> Gloger, 1841<br><i>S. tetradactylus</i> (Lichtenstein, 1823)<br><i>S. hotsoni</i> (Thomas, 1920)<br><i>S. h. hotsoni</i><br>? <i>S. h. firouzi</i> (Womochel, 1978)<br><i>S. euphraticus</i> Thomas, 1881<br><i>S. aulacotis</i> Wagner, 1840<br><i>S. williamsii</i> Thomas, 1897<br><i>S. w. williamsii</i><br>? <i>S. w. ssp</i> (NW Iran)<br><i>S. elater</i> (Lichtenstein, 1825)<br><i>S. e. elater</i><br><i>S. e. caucasicus</i> (Nehring, 1900)<br><i>S. (e.) strandii</i> (Heptner, 1934)<br><i>S. (e.) dzungariae</i> (Thomas, 1912)<br>?? <i>S. (e.) ?d. zaisanicus</i> (Shenbrot, 1991)<br><i>S. heptneri</i> (Pavlenko et Denisenko, 1976)<br><i>S. h. heptneri</i><br>? <i>S. h. ssp</i> (NE Iran)<br><b><i>S. indicus</i></b> (Gray, 1842)<br><i>S. i. indicus</i><br><i>S. l. moui</i> (Darvish et al., 2008)<br><i>S. (i.) aralychensis</i> (Satunin, 1901)<br><b><i>S. caprimulga</i></b> (Ellerman, 1948)<br><i>S. c. caprimulga</i><br>? <i>S. c. ssp</i> (Kopet Dag)<br><i>S. vinogradovi</i> (Argyropulo, 1941) | <b><i>Scarturus</i></b><br>subgenus <b><i>Scarturus</i></b><br><b><i>S. (S.) tetradactylus</i></b><br><br>subgenus <b><i>Paralactaga</i></b> Young, 1927<br><b><i>S. (P.) euphraticus</i></b><br><i>S. e. euphraticus</i><br><i>S. e. caprimulga</i><br><b><i>S. (P.) aulacotis</i></b><br><b><i>S. (P.) williamsii</i></b><br><b><i>S. (P.) hotsoni</i></b><br><i>S. h. hotsoni</i><br><i>S. h. firouzi</i><br><br>subgenus ? " <b><i>Microallactaga</i></b> " Shenbrot, 1974<br><b><i>S. ("M.") elater</i></b><br><i>S. e. elater</i><br><i>S. e. aralychensis</i><br><i>S. e. caucasicus</i><br><i>S. e. dzungariae</i><br><i>S. e. zaisanicus</i><br><i>S. e. indicus</i><br><br><b><i>S. ("M.") vinogradovi</i></b><br><i>S. v. vinogradovi</i><br><i>S. v. toussi</i> | subgenus <b><i>Scarturus</i></b><br><b><i>Allactaga</i></b> ( <i>S.</i> ) <b><i>tetradactyla</i></b>                                            | subgenus <b><i>Scarturus</i></b><br><b><i>Allactaga</i></b> ( <i>S.</i> ) <b><i>tetradactyla</i></b>                                                                                                                                                                                                                                                                                                                                                                                              | <b><i>Scarturus</i></b><br><b><i>S. tetradactylus</i></b>                                                                                                                                                                                                                                                                                                                 | <b><i>Scarturus</i></b><br><b><i>S. tetradactylus</i></b>                                                                                                                                             |
| <b><i>Pygeretmus</i></b> Gloger, 1841<br>subgenus <b><i>Pygeretmus</i></b><br><i>P. (P.) platyurus</i> (Lichtenstein, 1823)<br><i>P. (P.) shitkovi</i> (Kuznetsov, 1930)<br><i>P. s. shitkovi</i><br>? <i>P. s. ssp</i> (Ili valley)                                                                                                                                                                                                                                                                                                                                                                                                                                                                                                                                                                                                                                                                                                                                                                                                                           | <b><i>Pygeretmus</i></b><br>subgenus <b><i>Pygeretmus</i></b><br><i>P. (P.) platyurus</i><br><i>P. (P.) shitkovi</i>                                                                                                                                                                                                                                                                                                                                                                                                                                                                                                                                                                                                                                                        | <b><i>Pygeretmus</i></b><br>subgenus <b><i>Pygeretmus</i></b><br><i>P. (P.) platyurus</i><br><i>P. (P.) shitkovi</i>                            | <b><i>Pygeretmus</i></b><br>subgenus <b><i>Pygeretmus</i></b><br><i>P. (P.) platyurus</i><br><i>P. (P.) shitkovi</i>                                                                                                                                                                                                                                                                                                                                                                              | <b><i>Pygeretmus</i></b><br><i>P. platyurus</i><br><i>P. zhitkovi</i>                                                                                                                                                                                                                                                                                                     | <b><i>Pygeretmus</i></b><br><i>P. platyurus</i><br><i>P. zhitkovi</i>                                                                                                                                 |
| subgenus <b><i>Alactagulus</i></b> Nehring, 1897<br><i>P. (A.) pumilio</i> (Kerr, 1792)<br><i>P. p. pumilio</i><br><i>P. p. potanini</i> (Vinogradov, 1926)<br><i>P. p. bullatoides</i> Shenbrot, 1995<br>? <i>P. p. iliensis</i> Shenbrot, 1995<br>? <i>P. p. selevini</i> Shenbrot, 1995<br>? <i>P. p. ssp</i> (Zaisan depression)                                                                                                                                                                                                                                                                                                                                                                                                                                                                                                                                                                                                                                                                                                                           | subgenus <b><i>Alactagulus</i></b><br><i>P. (A.) pumilio</i><br><i>P. p. pumilio</i><br><i>P. p. bullatoides</i><br><i>P. p. iliensis</i><br><i>P. p. potanini</i><br><i>P. p. selevini</i>                                                                                                                                                                                                                                                                                                                                                                                                                                                                                                                                                                                 | subgenus <b><i>Alactagulus</i></b><br><i>P. (A.) pumilio</i>                                                                                    | subgenus <b><i>Alactagulus</i></b><br><i>P. (A.) pumilio</i><br><i>P. p. pumilio</i><br><i>P. p. bullatoides</i><br><i>P. p. iliensis</i><br><i>P. p. potanini</i><br><i>P. p. selevini</i>                                                                                                                                                                                                                                                                                                       | <b><i>Alactagulus</i></b><br><i>A. pygmaeus</i> , Pallas, 1778<br>(= <i>pumilio</i> )<br><i>A. p. pygmaeus</i><br><i>A. p. dinniki</i> Satunin, 1920<br><i>A. p. tanaiticus</i> Ognev, 1948<br><i>A. p. aralensis</i> Ognev, 1948<br><i>A. p. turkomanus</i> Heptner et Samorodov, 1939<br><i>A. p. potanini</i>                                                          | <b><i>Alactagulus</i></b><br><i>A. acontion</i> Pallas, 1878 (= <i>pumilio</i> )<br><i>A. a. acontion</i><br><i>A. a. dinniki</i><br><i>A. a. potanini</i>                                            |

## Biogeographic reconstructions

Node no. 1: divergence between the *Allactaga*+*Orientalactaga* and *Scarturus*+*Pygeretmus* clades 5.69–5.54 Mya (Fig. 3). We have no paleoclimate data for the Upper Miocene; however, reconstructions for the most warm and wet period of the earliest Pliocene (5.33 Mya) demonstrated that at that time, the range of the putative ancestral species was divided into East and West Central Asian parts separated along the Altay–Tarbagatay–Dzungar Alatau–Tianshan line. Thus, one may hypothesize that the *Allactaga*+*Orientalactaga* clade originated in East Central Asia, whereas the *Scarturus*+*Pygeretmus* clade evolved in West Central Asia.

Node no. 2: divergence between *Orientalactaga* and *Allactaga*+*Allactodipus* 4.37–4.18 Mya (vicariance model) (Fig. 4). As a result of range fragmentation, several small isolates appeared in central Kyzylkum 4.34 Mya and existed up to 4.28 Mya with partial interruptions along narrow corridors (semi-isolation) 4.31 and 4.27 Mya. The ancestor of *Allactaga* + *Allactodipus* possibly originated from these isolates.

Node no. 3: divergence between *Allactaga* and *Allactodipus* (3.28–3.2 Mya) (vicariance model). An isolate on Krasnovodsk Plateau separated from the main range 3.26 Mya and existed up to 3.18 Mya without interruption. It is plausible that *Allactodipus* originated from this isolate.

Node no. 4: divergence between *Allactaga major* and *A. severtzovi* (2.02–1.9 Mya) (vicariance model). Three isolates appeared 2.0 Mya and existed up to 1.91 Mya with two interruptions at 1.98–1.97 and 1.94–1.93 Mya: (1) in the eastern part of Turgay depression; (2) in the middle part of the Volga basin; (3) in Zaisan Hollow. *A. major* originated from one of these three isolates, whereas the ancestor of *A. severtzovi* occurred in the main part of the geographic range.

Node no. 5: divergence between *Orientalactaga sibirica* and *O. bullata*+*O. balikunica* (2.17–1.81 Mya) (founder speciation model). The ancestor of the group entered the region from the eastern part of Central Asia to Kazakhstan through a narrow corridor in Zhungarian Gate 2.09 Mya. This corridor was closed 2.06 Mya and was restored later for short periods 1.91 and 1.84 Mya. It is possible to conclude that the ancestor of *O. sibirica* originated in the Kazakh part of the group's geographic range.

Node no. 6: divergence between *O. bullata* and *O. balikunica* (1.54–1.43 Mya) (vicariance model). Two relatively small isolates emerged due to range fragmentation in the current Shargyin Gobi and Beger Hollow 1.55 Mya and existed up to 1.5 Mya with one short interruption 1.52 Mya. *O. bullata* had possibly originated in one of these two isolates, whereas the ancestor of *A. balikunica* occurred in the main part of the group's geographic range.

Node no. 7: divergence between ancestors of *Scarturus* and *Pygeretmus* (4.48–4.32 Mya) (vicariance model). Peripheral isolate in the area around the current border

between Afghanistan and Pakistan separated from the main range at 4.42 Mya and existed up to 4.35 Mya with one short interruption along a narrow corridor 4.37 Mya. *Scarturus* has possibly originated in this isolate.

Node no. 8: divergence between *S. tetradactylus* + *S. hotsoni* and VECE clades (4.1-3.95 Mya) (founder speciation model). A corridor connecting the main part of the group's geographic range with current Iranian Baluchestan opened 4.0 Mya and was closed from 3.99 Mya. It seems that the ancestor of the former clade dispersed across this corridor and evolved in the Baluchestan isolate.

Node no. 9: divergence between the *S. euphraticus* species group and other lineages within VECE clade (3.21-3.11 Mya). Two scenarios are possible for this node: (1) throughout almost all of this period, a narrow corridor connected the main part of the group's geographic range with Anatolia; this corridor was closed twice for short periods 3.14 and 3.12 Mya; (2) a narrow corridor connecting Anatolia with northern Mesopotamia emerged 3.15 Mya and existed up to 3.12 Mya; all other time before and after this event Anatolia was isolated from northern Mesopotamia. According to the first scenario, the ancestor of the *S. euphraticus* species group emerged as a result of isolation in Anatolia (vicariance model). According to the second scenario, the ancestor entered northern Mesopotamia from Anatolia and evolved in the former area after its isolation (founder speciation model).

Node no. 10: divergence between *S. caprimulga*+*S. vinogradovi* and *S. elater* species group (2.85-2.78 Mya) (vicariance model). During this entire period, the main part of the group's geographic range and the area around the current border between Afghanistan and Pakistan were either isolated (2.88-2.86, 2.84, 2.80-2.79, and 2.77-2.75 Mya) or connected by a long narrow corridor (2.89, 2.85, 2.83-2.81, 2.78, and 2.74-2.69 Mya). It appears that the ancestor of *S. caprimulga* + *S. vinogradovi* clade originated from this isolated area.

Node no. 11: divergence between *S. caprimulga* and *S. vinogradovi* (2.50-2.45 Mya) (founder speciation model). A narrow long corridor connecting southeastern and central Afghanistan with northern foothills of Tien-Shan across the western foothills of Pamir and Tien-Shan was established 2.53 Mya and was interrupted at 2.47, 2.45, and 2.43 Mya. The ancestor of *S. vinogradovi* apparently dispersed northwards along this corridor and later evolved in isolation.

Nodes 14-15: divergence within *S. euphraticus* species group (1.21-0.87 Mya). The order of branching within this clade has no high support. Paleo-environment distribution modeling demonstrated that during this entire period, there were two groups of populations: (1) Anatolia, Trans-Caucasus, and N Zagros, and (2) Levant, N Mesopotamia, and S Zagros. During most of the time, these two groups of populations were connected by several narrow corridors; these corridors closed twice, 1.23-1.24 and 1.07 Mya. Apparently, *S. williamsi* originated in the first (northern) part of the group's geographic range, whereas the common ancestor of *S. euphraticus* and *S. aulacotis* originated in the second (southern) part of the group's range (vicariance model). The common ancestor of *S. euphraticus* and *S. aulacotis* disappeared from the eastern part of its range (SW foothills of Zagros Mountains and SE Mesopotamia) 1.07 Mya and dispersed southeast again 1.05 Mya; northern and southeastern parts of



the geographic range were completely isolated 1.03-1.02, 1.00-0.99, and 0.95-0.93 Mya, but were connected by a narrow corridor during other periods. It seems that *S. euphraticus* originated in southeastern isolate, whereas *S. aulacotis* evolved in the main part of the geographic range of *S. euphraticus* and *S. aulacotis* common ancestor (founder speciation model).

Node no 16: divergence between *S. elater* and *S. heptneri* (1.01–0.93 Mya) (vicariance model). Fergana Valley was isolated from the main part of the geographic range 1.05–1.04, 1.01, 0.97–0.96, and 0.93–0.87 Mya; during other periods, it was connected by a narrow corridor. It seems obvious that *S. heptneri* originated in the Fergana isolate.

Node no. 17: divergence between *Pygeretmus* and *Alactagulus* subgenera (2.57-2.34 Mya) (vicariance model). The Ili River Hollow (SE Kazakhstan) was connected with the main part of *Pygeretmus* genus geographic range by a narrow corridor during most of this period, but became isolated at 2.53-2.51, 2.49-2.48, 2.45, and 2.37 Mya. Ancestral *Alactagulus* possibly evolved in the main part of the geographic range, whereas the common ancestor of *P. shitkovi* and *P. platyurus* evolved in the Ili isolate.

Node no. 18: divergence between *Pygeretmus shitkovi* and *P. platyurus* (1.42-1.36 Mya). Undivided geographic range of the common ancestor of *P. shitkovi* and *P. platyurus* existed in Kazakhstan, N Turan, and Dzungaria up to 1.43 Mya. The geographic range was broken into several isolated parts 1.42 Mya: large solid western area and several small eastern areas (around Balkhash, in Ili River Hollow, and in Dzungaria). This pattern existed up to 1.41 Mya after that isolation disappeared, but was restored 1.38-1.37 and 1.34-1.31 Mya. *P. platyurus* has possibly originated from the large western isolate, whereas *Pygeretmus shitkovi* emerged in one of the small eastern isolates.

**Figure S7. Geography of speciation in the nodes no. 1-11, 14-18**

All maps were obtained as raster maps from modeling using MAXENT 3.4.1 software and then generated as polygon maps using ArcGIS Desktop 10.8.1 software.

MAXENT: available at [https://biodiversityinformatics.amnh.org/open\\_source/maxent/](https://biodiversityinformatics.amnh.org/open_source/maxent/)

ArcGIS Desktop: Copyright © 1995-2020 Esri

Node no. 1. Allactaginae. Variables used in the modeling: Bio 1, Bio 2, Bio 4, Bio 8, Bio 15 and Bio 16. AUC = 0.756. Threshold value = 0.404.

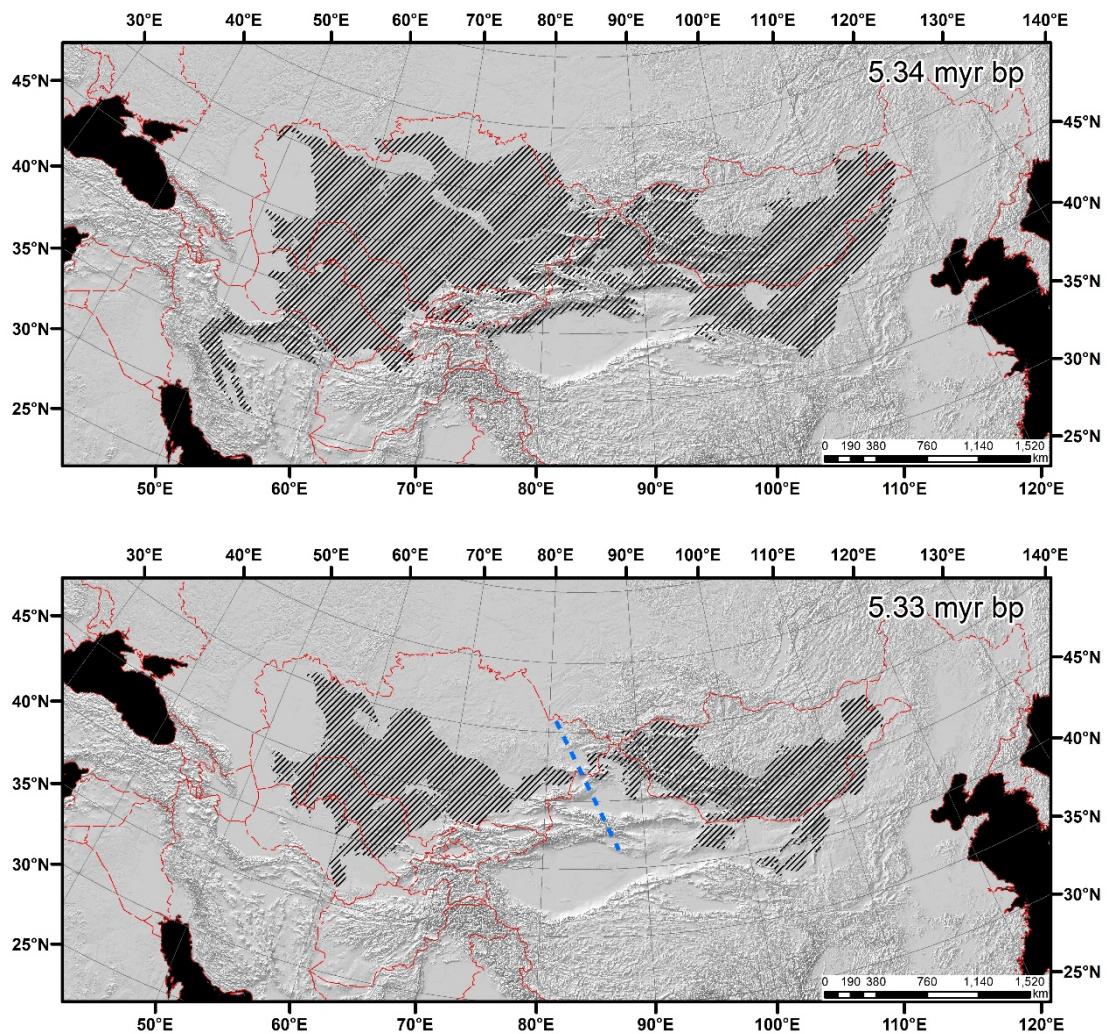



Node no. 2 – *Allactaga*+*Allactodipus* / *Orientalactaga*. Variables used in the modeling: Bio 1, Bio 2, Bio 4, Bio 5, Bio 6, Bio 12 and Bio 15. AUC = 0.772. Threshold value = 0.428.

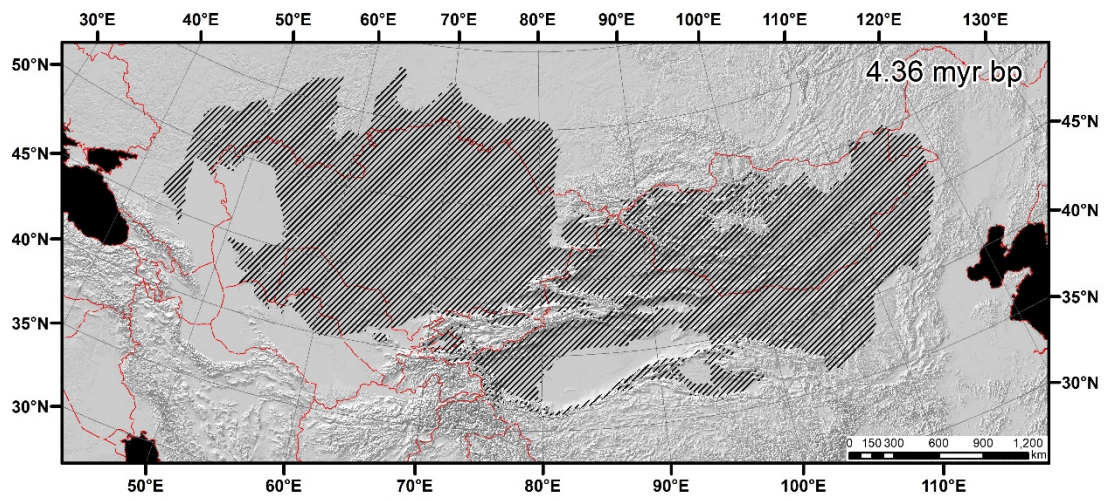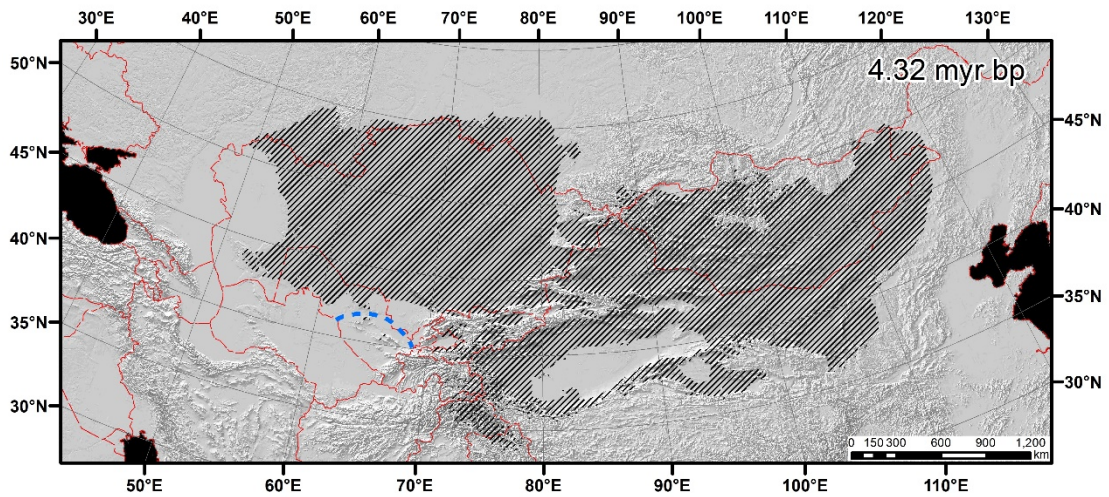



Node no. 3 – *Allactaga* / *Allactodipus*. Variables used in the modeling: Bio 2, Bio 4, Bio 5, Bio 7, Bio 10 and Bio 19. AUC = 0.795. Threshold value = 0.495.

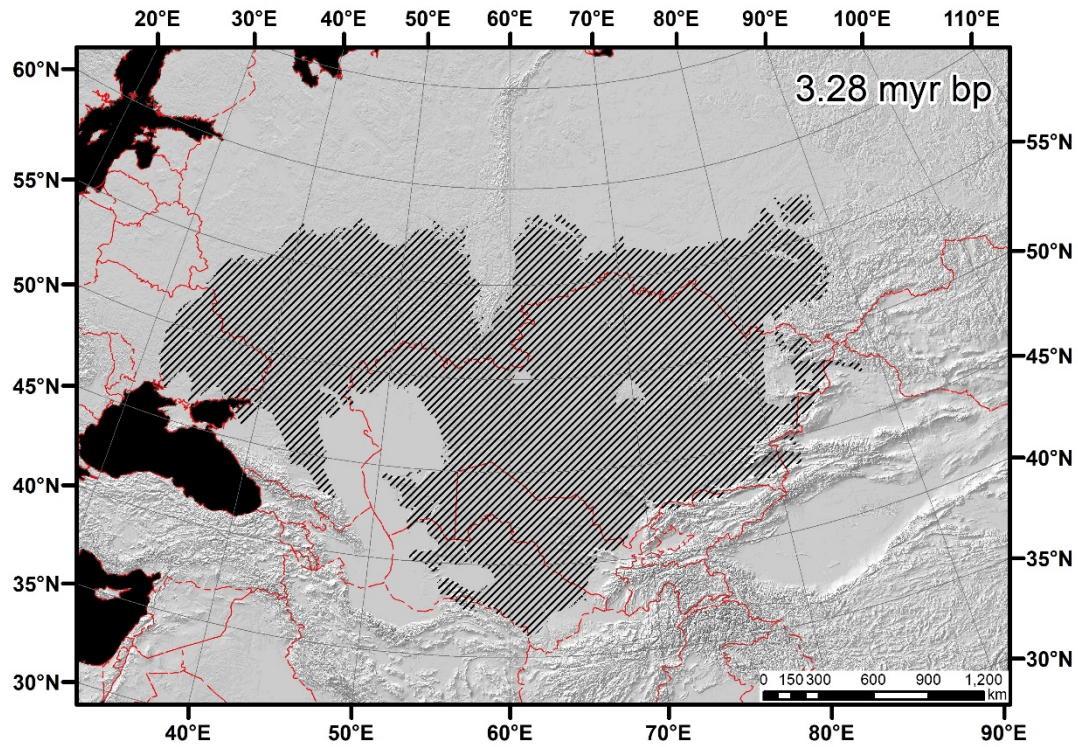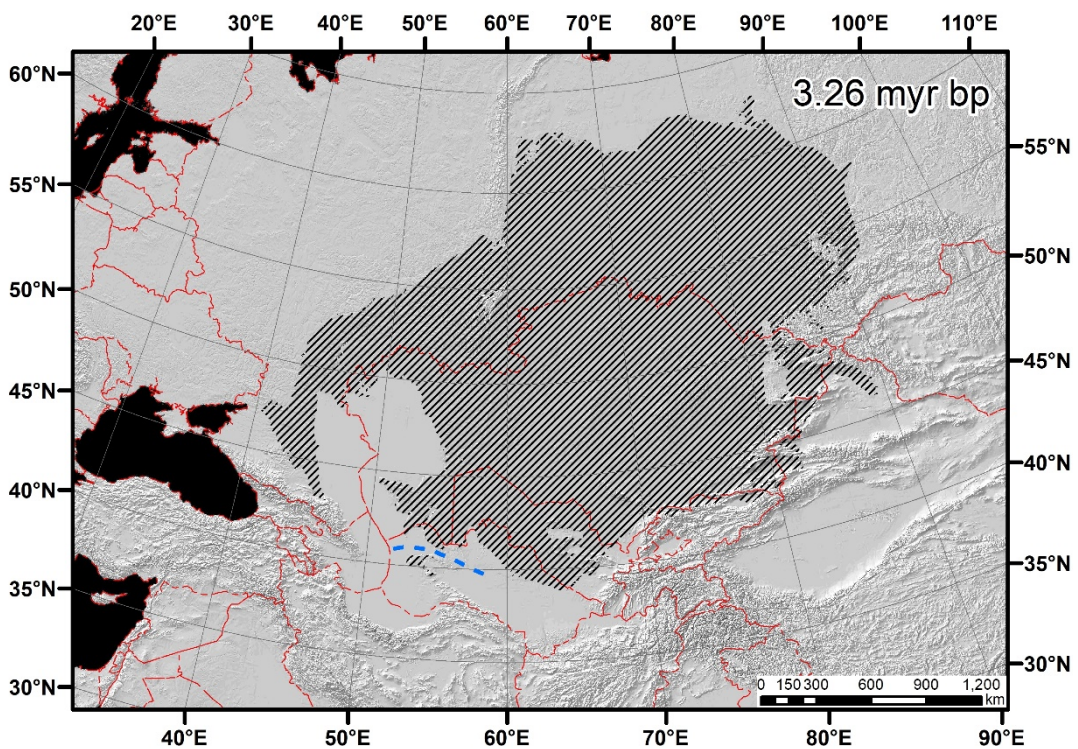



Node no. 4 - *Allactaga*. Variables used in the modeling: Bio 1, Bio 2, Bio 4, Bio 5, Bio 6, Bio 10 and Bio 19. AUC = 0.795. Threshold value = 0.509. The model for 1.92 myr bp is shown as the coldest and driest time period when geographic range was maximally constricted with minimal size of peripheral isolates.

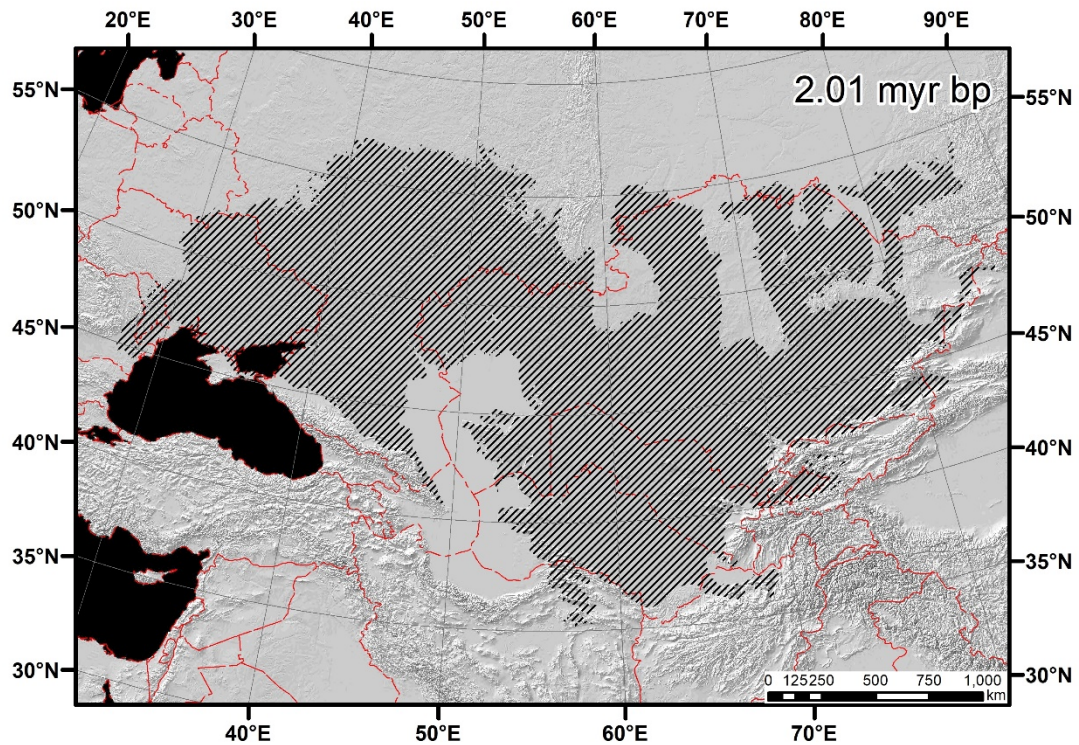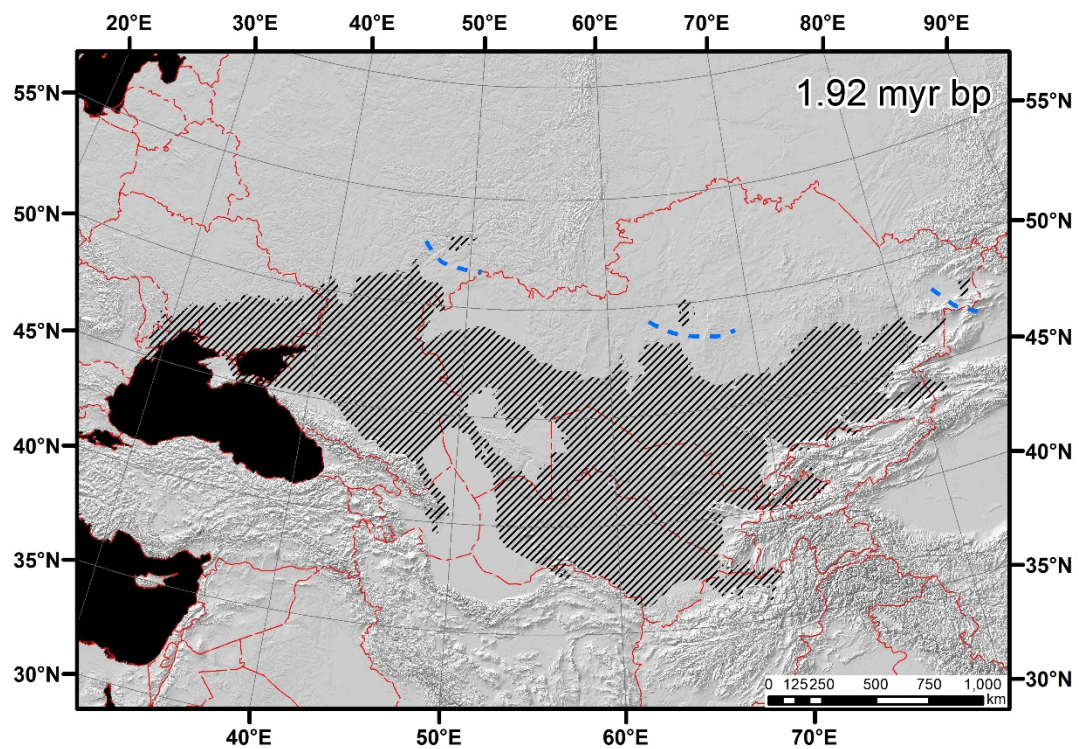



Node no. 5 - *Orientallactaga*. Variables used in the modeling: Bio 1, Bio 2, Bio 4, Bio 6, Bio 12, Bio 15 and Bio 19. AUC = 0.843. Threshold value = 0.312.

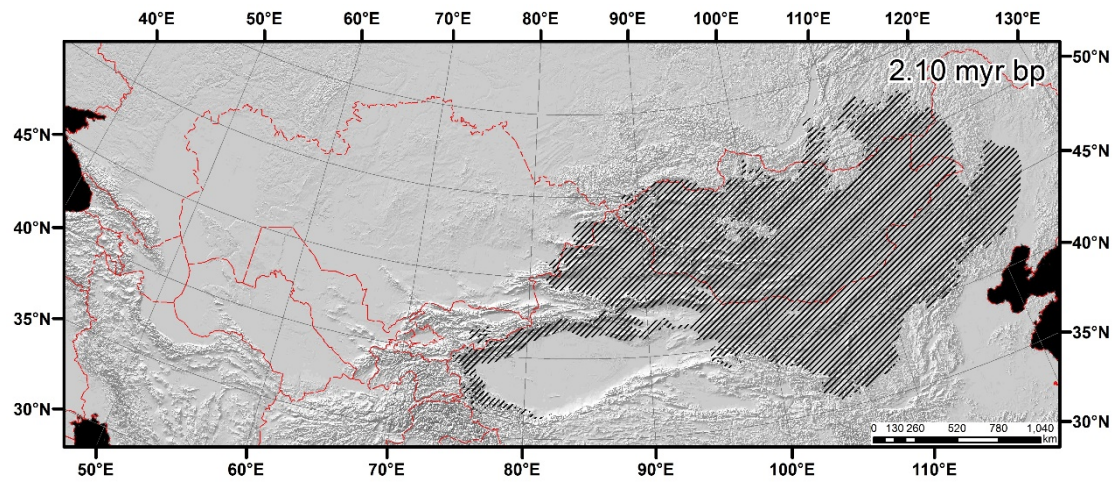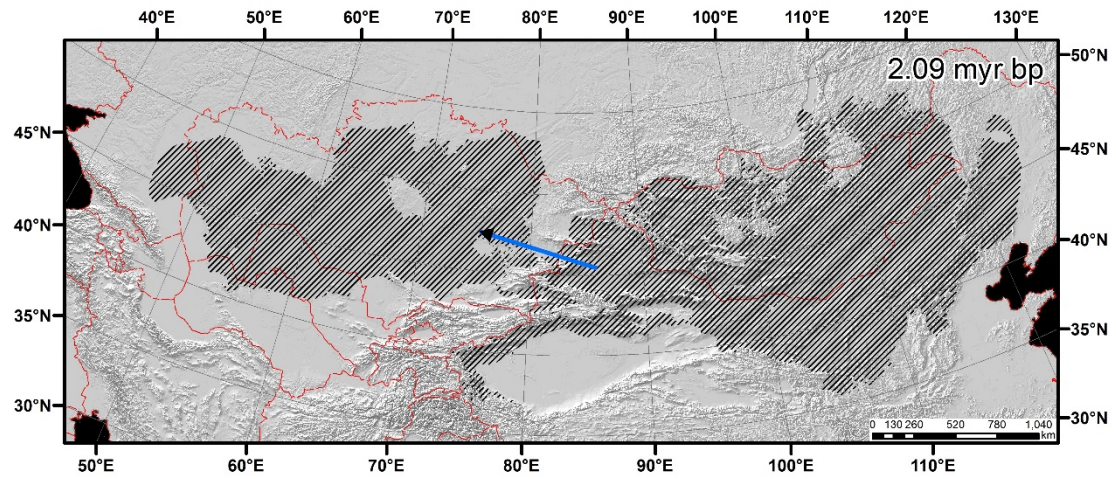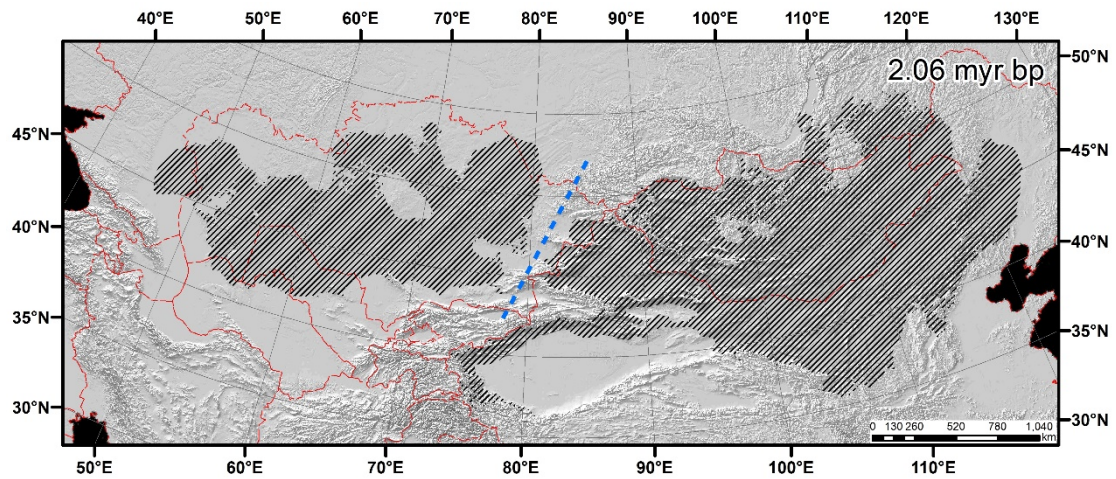



Node no. 6 – *Orientallactaga bullata* / *O. balikunica*. Variables used in the modeling: Bio 1, Bio 4, Bio 5, Bio 11, Bio 15 and Bio 16. AUC = 0.912. Threshold value = 0.327.

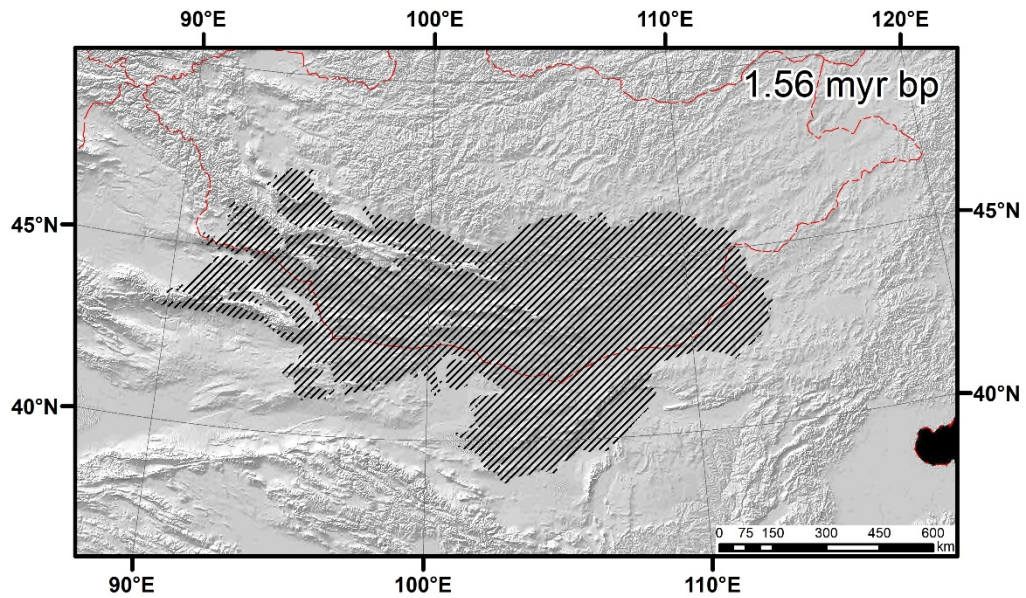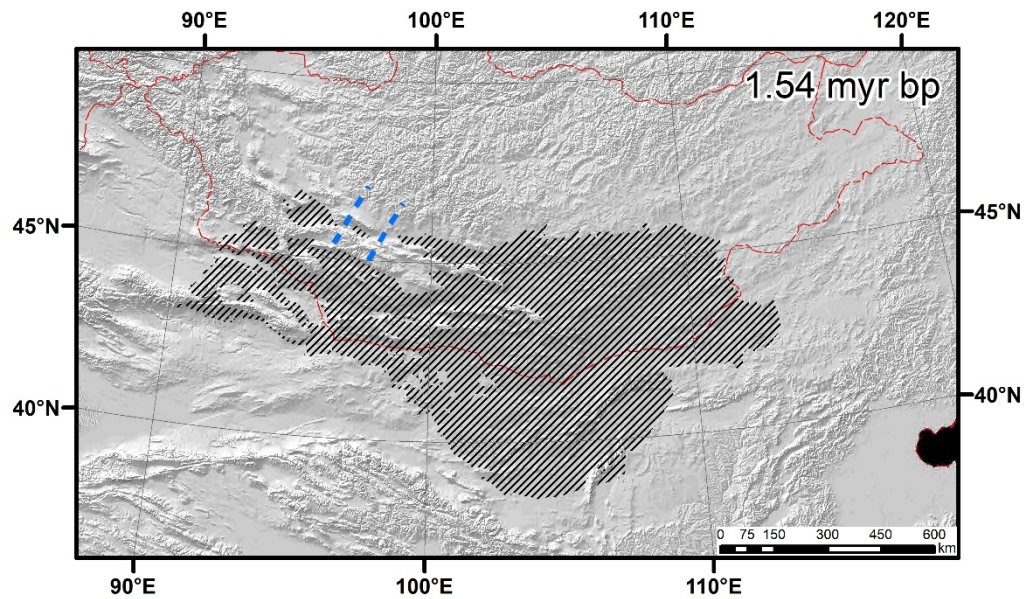



Node no. 7 – *Scarturus / Pygeretmus*. Variables used in the modeling: Bio 1, Bio 2, Bio 10, Bio 12, Bio 18 and Bio 19. AUC = 0.836. Threshold value = 0.339.

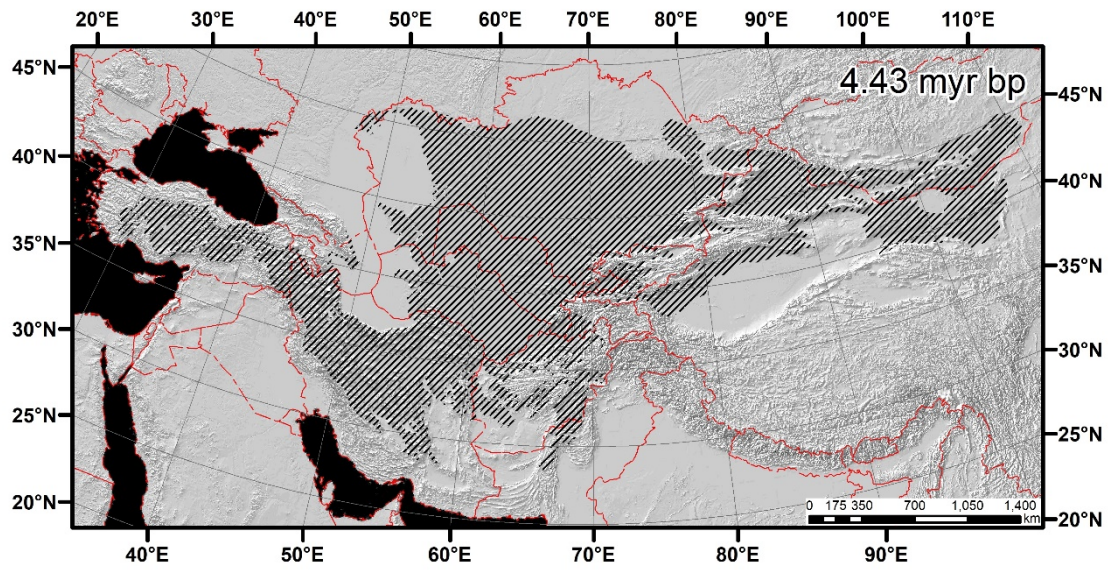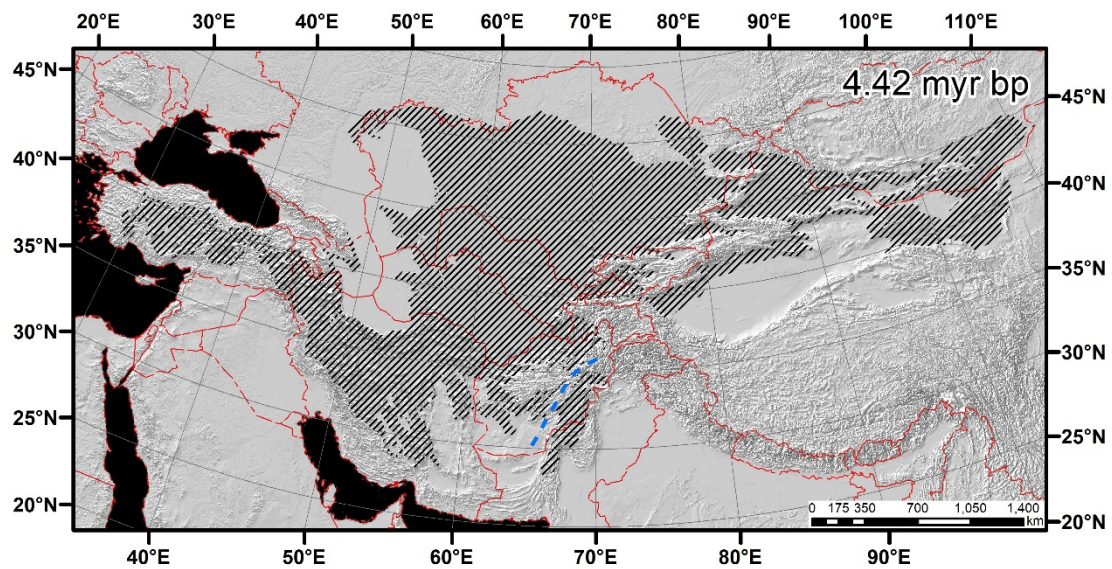



Node no. 8 – *Scarturus* genus. Variables used in the modeling: Bio 1, Bio 2, Bio 4, Bio 5, Bio 12, Bio 18 and Bio 19. AUC = 0.854. Threshold value = 0.304.

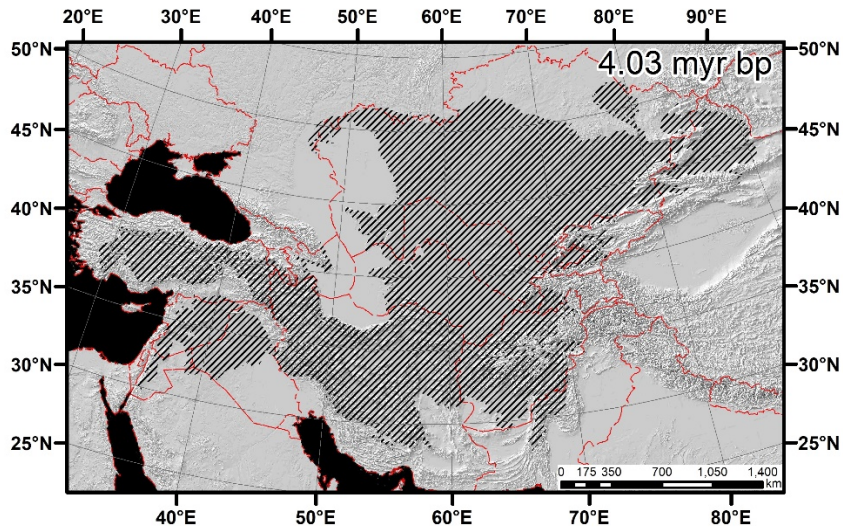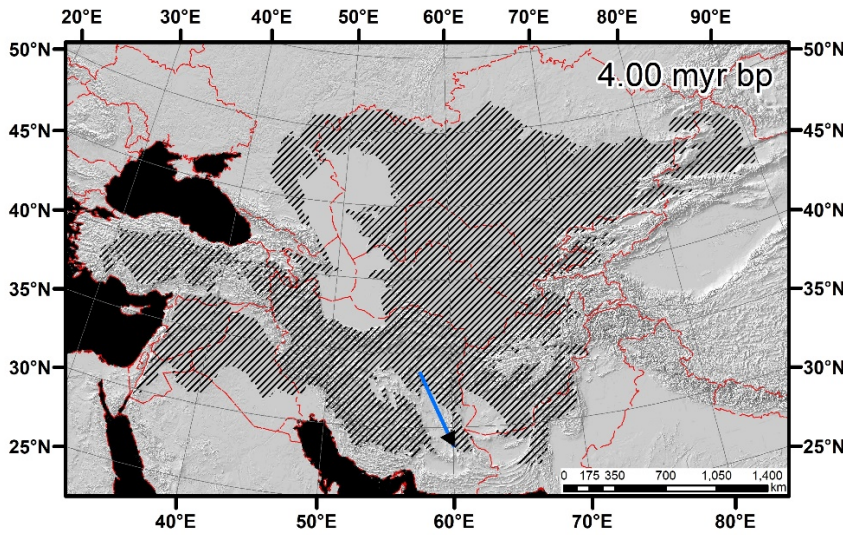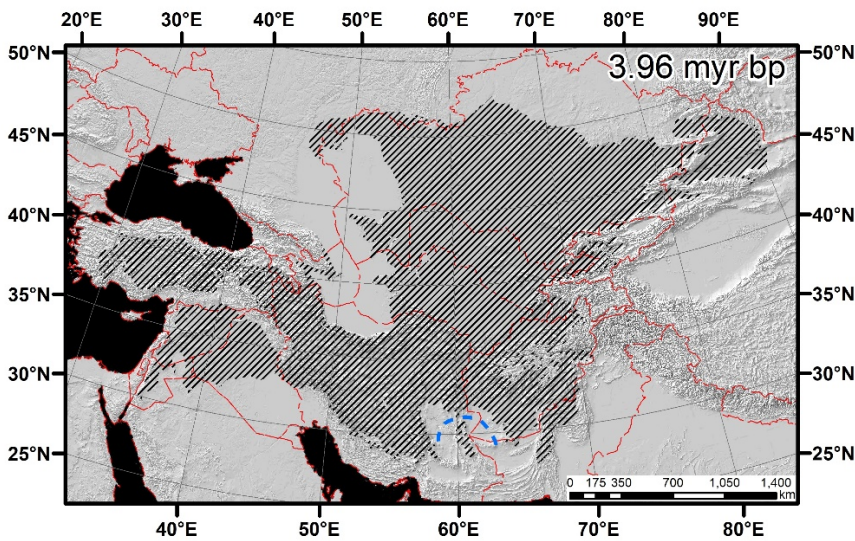



Node no. 9 – *Scarturus euphraticus* species group / sister lineages. Variables used in the modeling: Bio 1, Bio 2, Bio 4, Bio 10, Bio 12, Bio 18 and Bio 19. AUC = 0.854. Threshold value = 0.356.

Scenario 1.

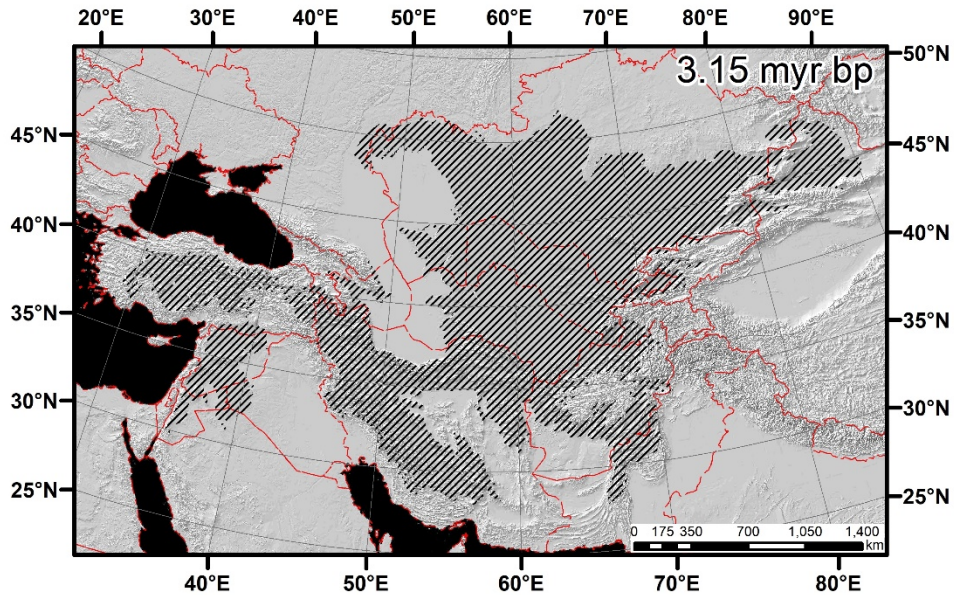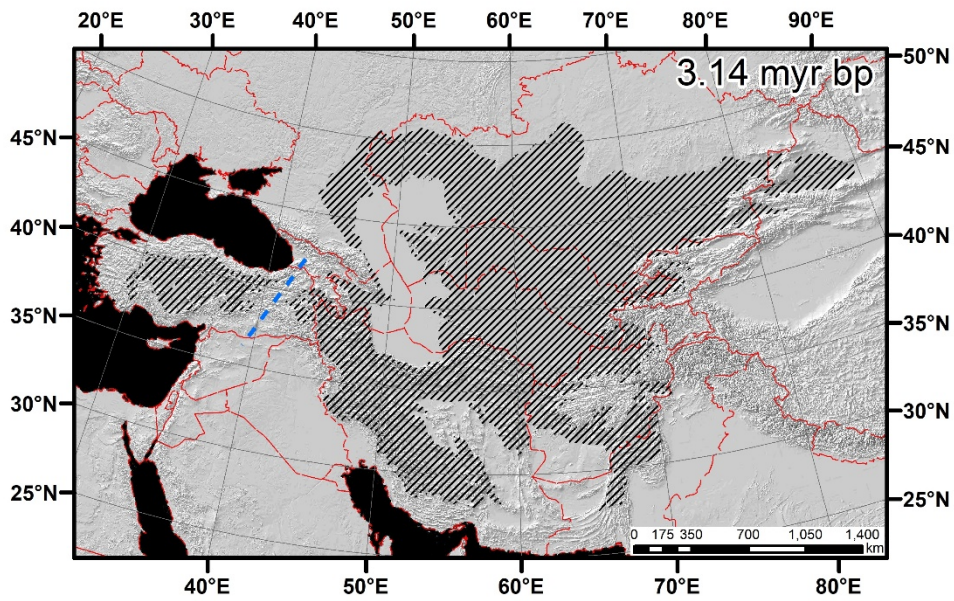



Scenario 2.

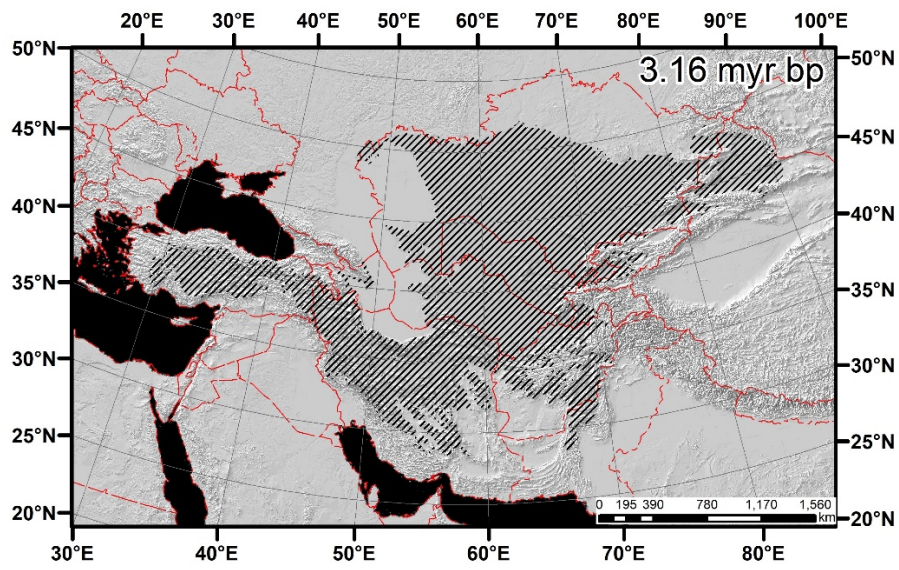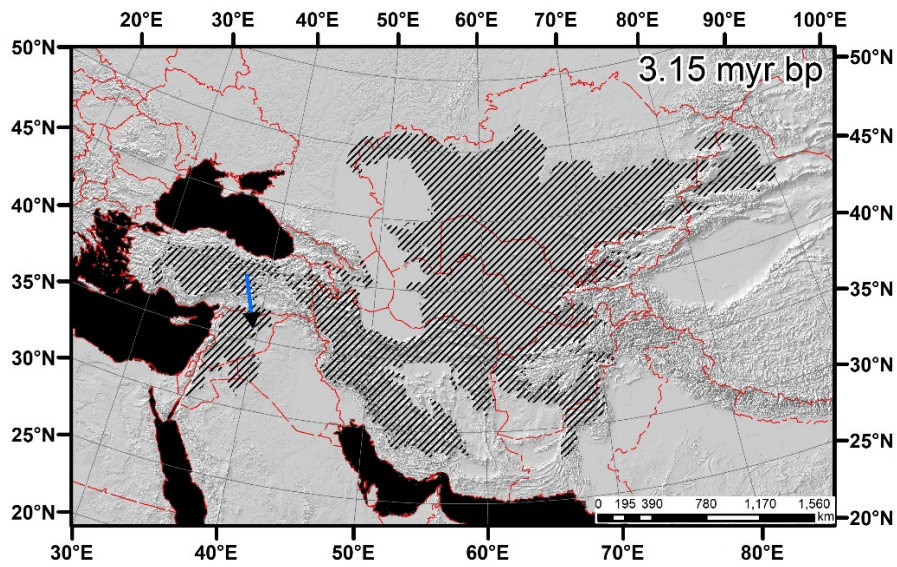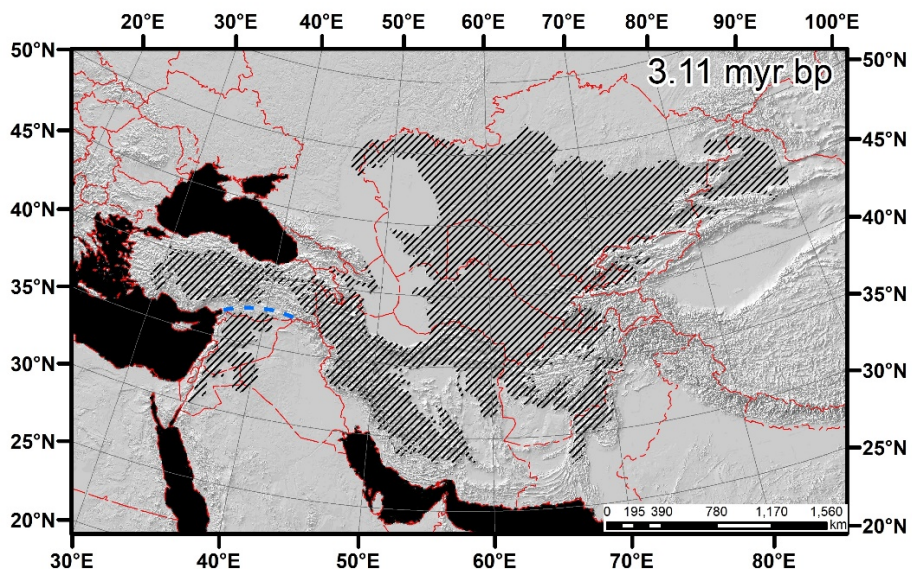

Node no. 10 – *Scarturus elater* species group / sister lineages. Variables used in the modeling: Bio 1, Bio 3, Bio 7, Bio 10, Bio 18 and Bio 19. AUC = 0.860. Threshold value = 0.300.

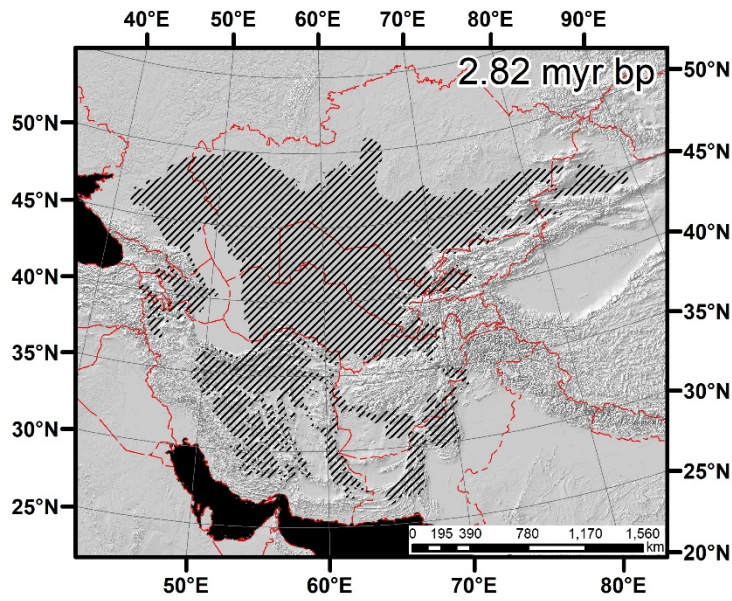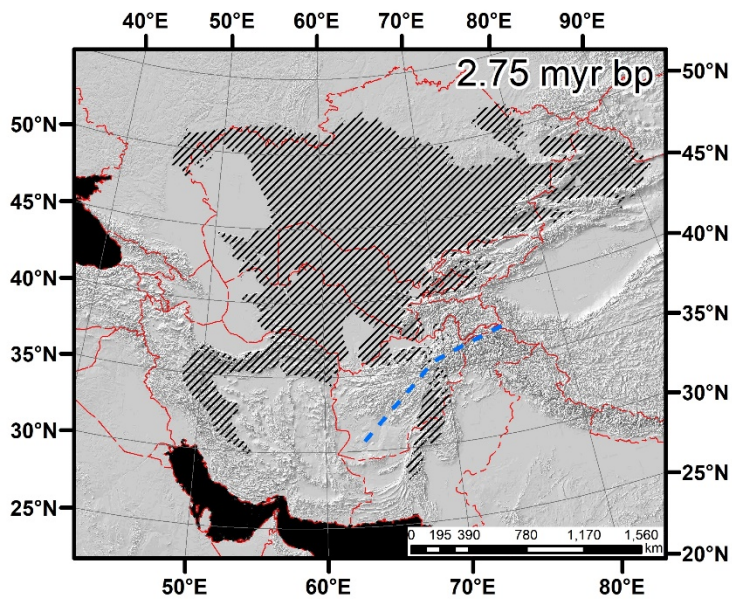



Node no. 11 – *Scarturus caprimulga* / *S. vinogradovi*. Variables used in the modeling: Bio 1, Bio 7, Bio 11, Bio 13, Bio 17 and Bio 19. AUC = 0.959. Threshold value = 0.158. Dots – potentially suitable but not occupied areas.

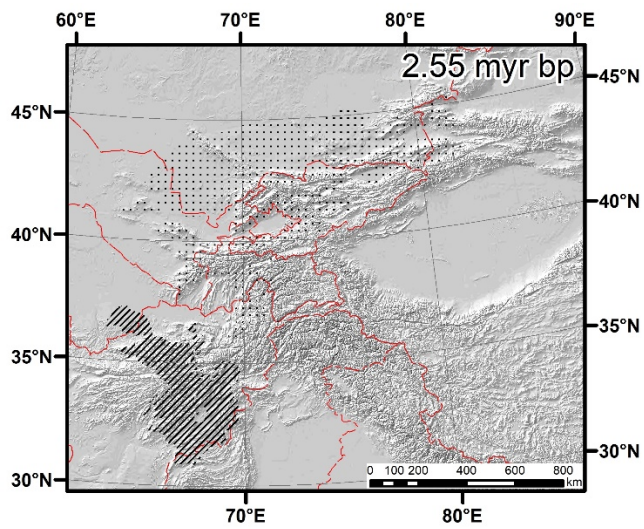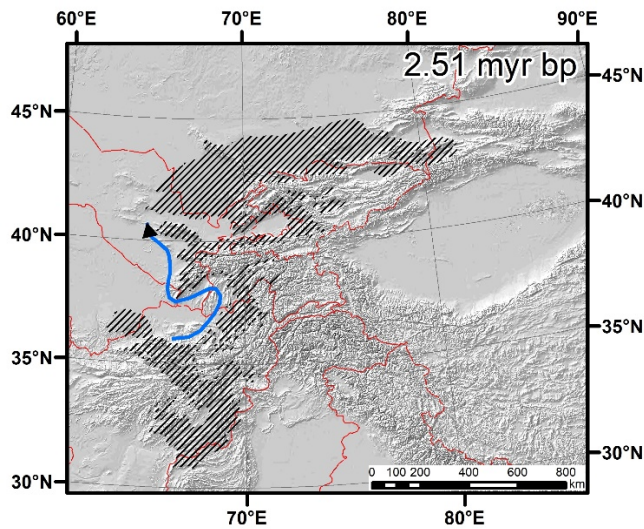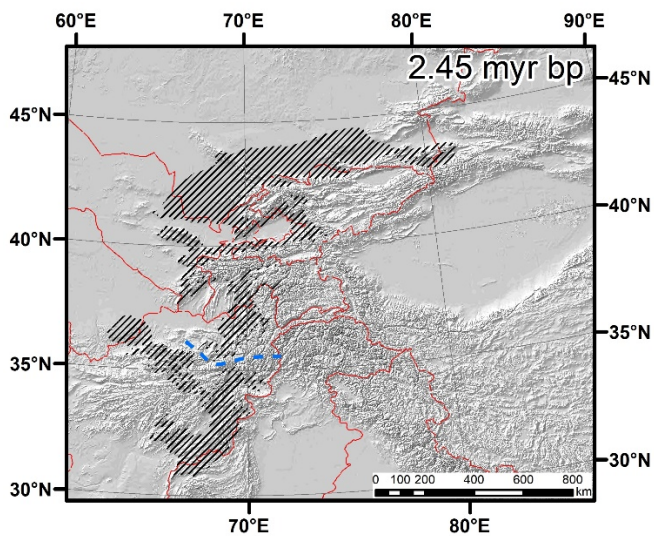

Nodes 14 – divergence within *Scarturus euphraticus* speies group between *S. williamsi* and *S. euphraticus* + *S. aulacotis*. Variables used in the modeling: Bio 2, Bio 6, Bio 8, Bio 12, Bio 18 and Bio 19. AUC = 0.873. Threshold value = 0.446.

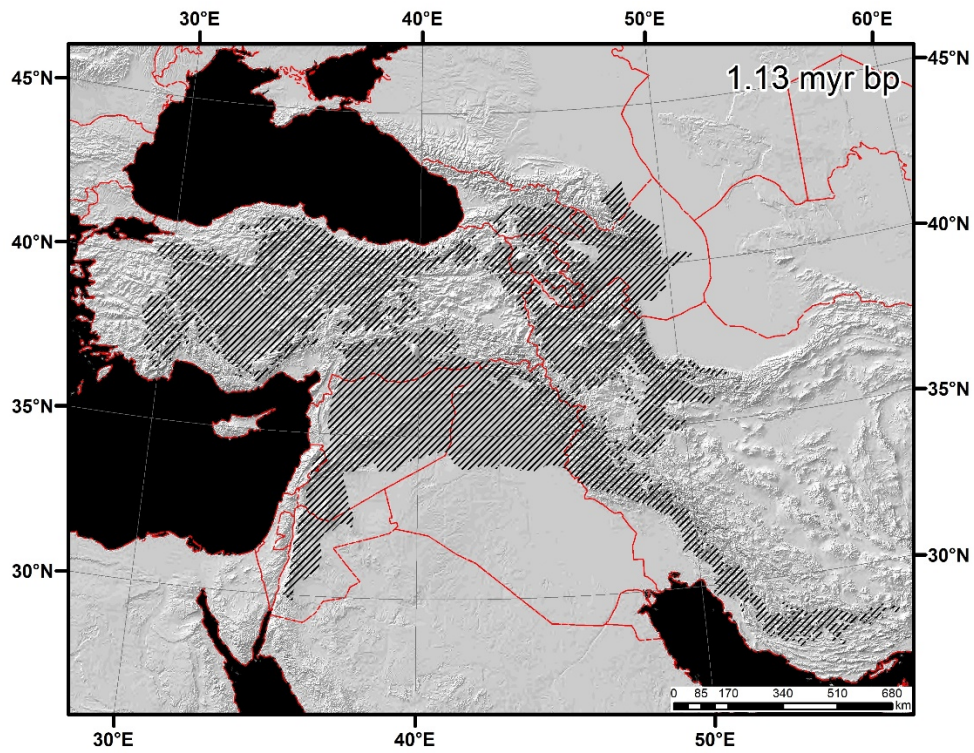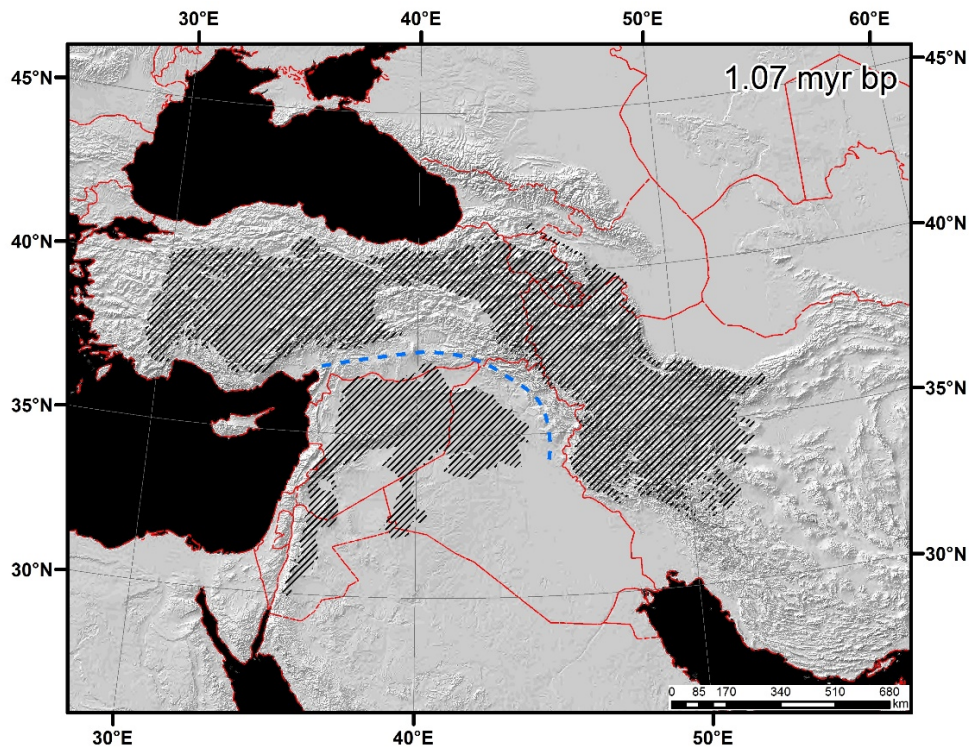



Node 15 - divergence between *S. euphraticus* and *S. aulacotis*. Variables used in the modeling: Bio 2, Bio 6, Bio 8, Bio 13 and Bio 19. AUC = 0.925. Threshold value = 0.308.

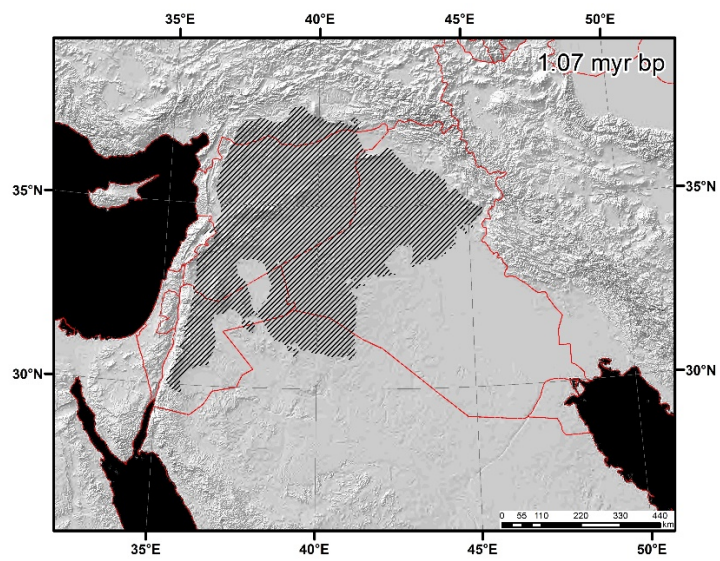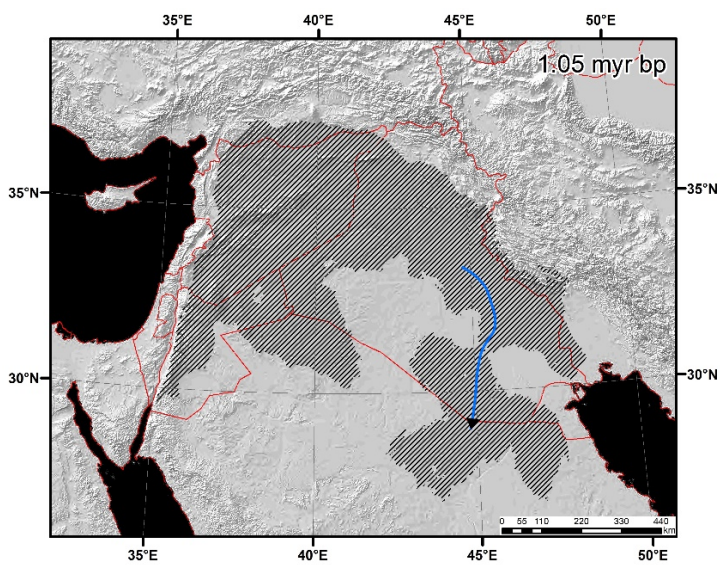

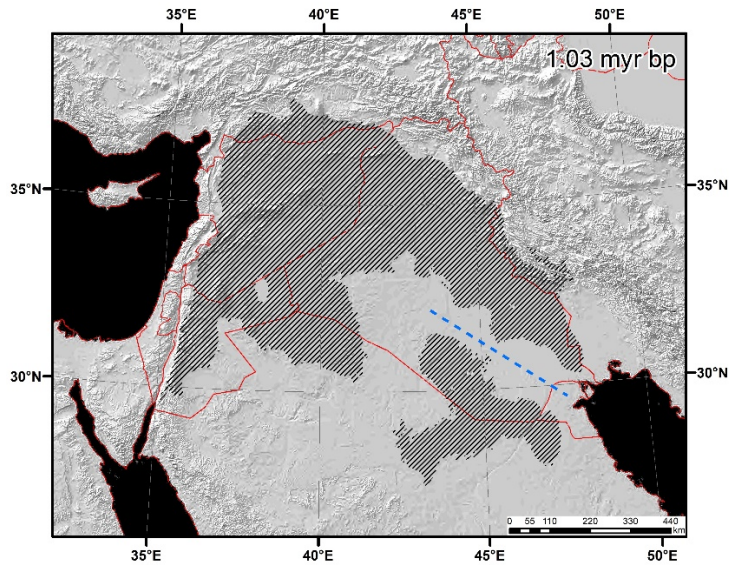



Node 16 - divergence between *S. elater* and *S. heptneri*. Variables used in the modeling: Bio 1, Bio 3, Bio 7, Bio 10, Bio 12 and Bio 19. AUC = 0.872. Threshold value = 0.365.

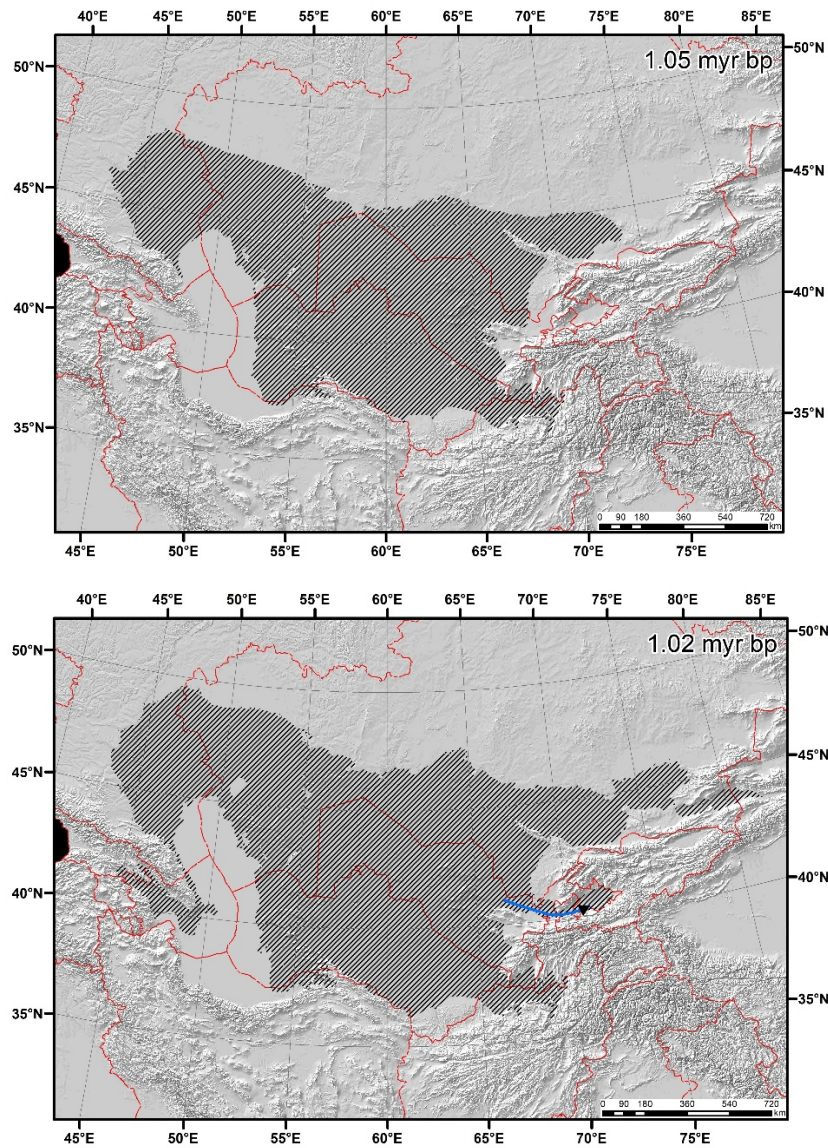

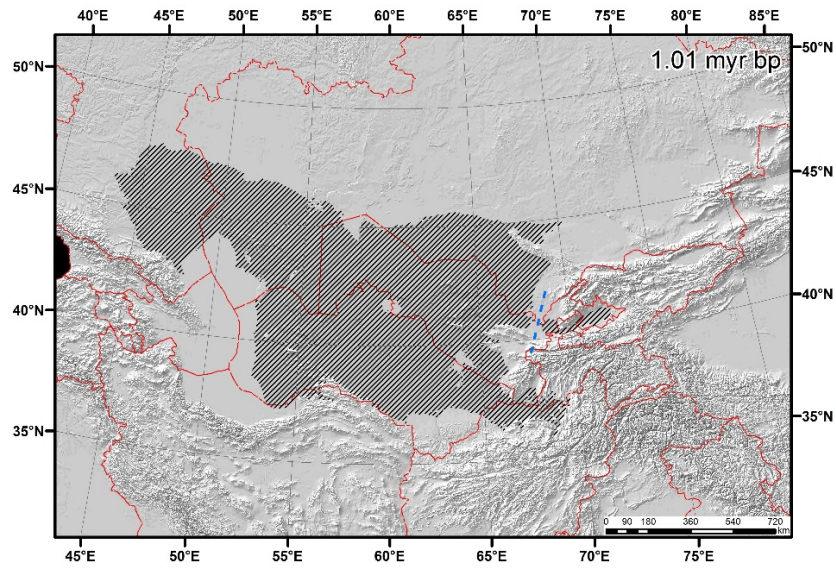



Node 17 - divergence between *Pygeretmus* and *Alactagulus* subgenera. Variables used in the modeling: Bio 3, Bio 4, Bio 6, Bio 10, Bio 12 and Bio 15. AUC = 0.867. Threshold value = 0.323.

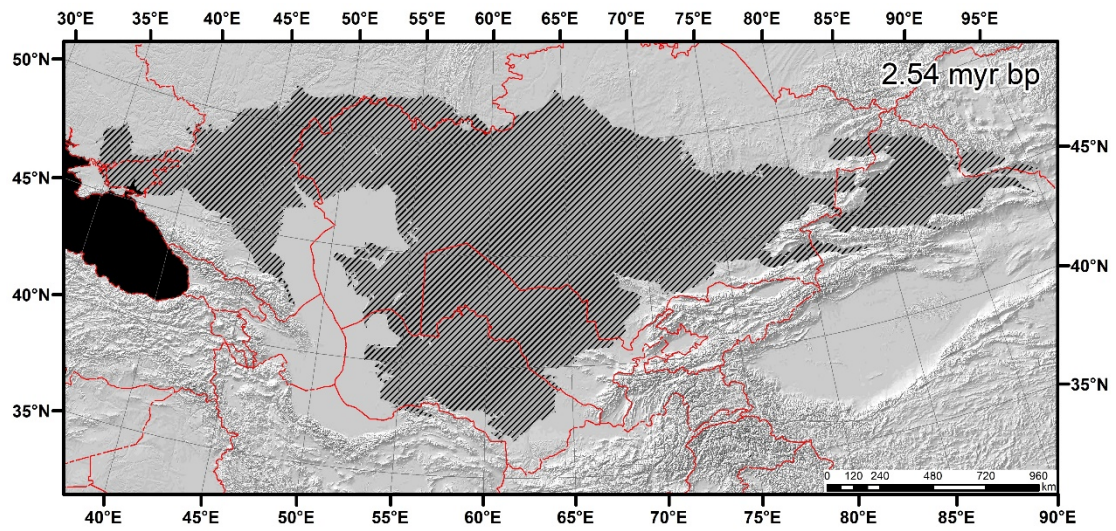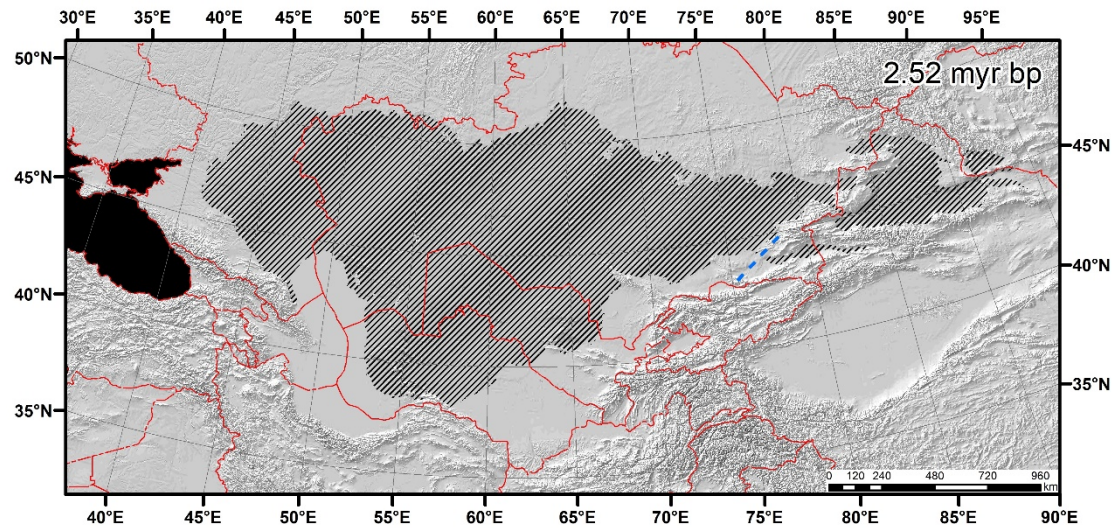

Node 18 - divergence between *Pygeretmus shitkovi* and *P. platyurus*. Variables used in the modeling: Bio 2, Bio 7, Bio 10, Bio 13, Bio 14, Bio 15 and Bio 17. AUC = 0.898. Threshold value = 0.126.

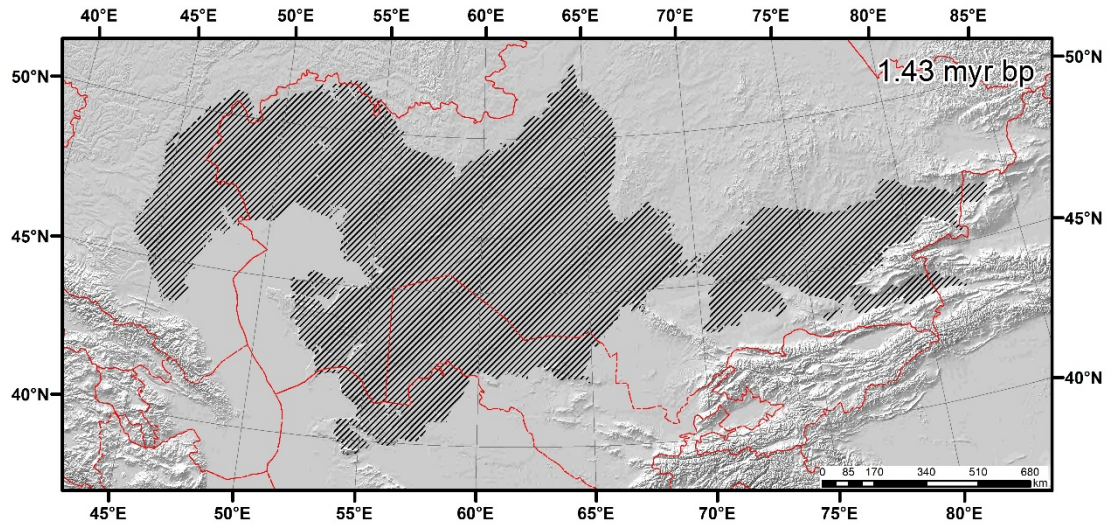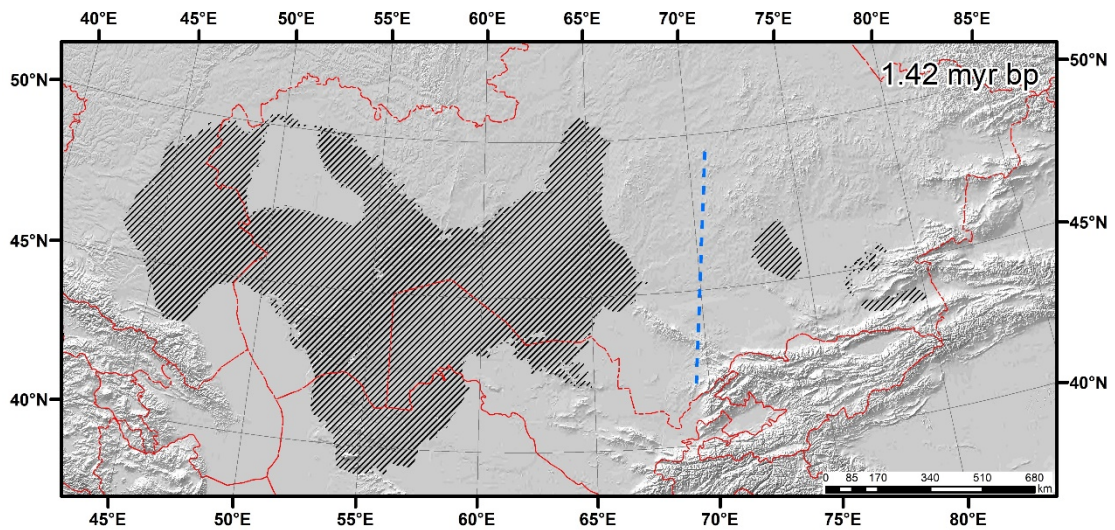



## REFERENCES

1. Lebedev, V. S. *et al.* Molecular phylogeny and systematics of Dipodoidea: a test of morphology-based hypotheses. *Zool. Scr.* **42**, 231–249 (2013).
2. Wu, S. *et al.* Molecular and paleontological evidence for a post-cretaceous origin of rodents. *PLoS One* **7**, e46445 (2012).
3. Pisano, J. *et al.* Out of Himalaya: the impact of past Asian environmental changes on the evolutionary and biogeographical history of Dipodoidea (Rodentia). *J. Biogeogr.* **42**, 856–870 (2015).
4. Bannikova, A. *et al.* Genetic evidence for several cryptic species within the *Scarturus elater* species complex (Rodentia: Dipodoidea): when cryptic species are really cryptic. *Biol. J. Linn. Soc.* **126**, 16–39 (2019).
5. Moore, T. Y. *et al.* Multiple phylogenetically distinct events shaped the evolution of limb skeletal morphologies associated with bipedalism in the jerboas. *Curr. Biol.* **25**, 2785–2794 (2015).
6. Huchon, D. *et al.* Rodent phylogeny and a timescale for the evolution of glires: evidence from an extensive taxon sampling using three nuclear genes. *Mol. Biol. Evol.* **19**, 1053–1065 (2002).
7. Huchon, D. *et al.* Multiple molecular evidences for a living mammalian fossil. *Proc. Natl. Acad. Sci.* **104**, 7495–7499 (2007).
8. DeBry, R. W. Identifying conflicting signal in a multigene analysis reveals a highly resolved tree: The phylogeny of Rodentia (Mammalia). *Syst. Biol.* **52**, 604–617 (2003).
9. Meredith, R. W. *et al.* Impacts of the Cretaceous Terrestrial Revolution and KPg Extinction on Mammal Diversification. *Science (80-. )*. **334**, 521–524 (2011).
10. Blanga-Kanfi, S. *et al.* Rodent phylogeny revised: analysis of six nuclear genes from all major rodent clades. *BMC Evol. Biol.* **9**, 71 (2009).
11. Huchon, D., Catzeflis, F. M. & Douzery, E. J. Molecular evolution of the nuclear von Willebrand factor gene in mammals and the phylogeny of rodents. *Mol. Biol. Evol.* **16**, 577–589 (1999).
12. Cheng, J. *et al.* Phylogeny, taxonomic reassessment and ‘ecomorph’ relationship of the *Orientallactaga sibirica* complex (Rodentia: Dipodidae: Allactaginae). *Zool. J.*



*Linn. Soc.* **192**, 185–205 (2021).

13. Liao, J. *et al.* Comparative phylogeography of *Meriones meridianus*, *Dipus sagitta*, and *Allactaga sibirica*: Potential indicators of the impact of the Qinghai-Tibetan Plateau uplift. *Mamm. Biol.* **81**, 31–39 (2016).
14. Dianat, M., Aliabadian, M., Darvish, J. & Akbarirad, S. Molecular phylogeny of the Iranian Plateau five-toed jerboa, *Allactaga* (Dipodidea: Rodentia), inferred from mtDNA. *Mammalia* **77**, (2013).
15. Mohammadi, S., Afonso, S., Adibi, M. A., Melo-Ferreira, J. & Campos, R. A new and highly divergent mitochondrial lineage in the small five-toed jerboa, *Allactaga elater*, from Iran (Mammalia: Rodentia). *Zool. Middle East* **62**, 206–211 (2016).
16. Moshtaghi, S., Darvish, J., Mirshamsi, O. & Mahmoudi, A. Cryptic species diversity in the genus *Allactaga* (Rodentia: Dipodidae) at the edge of its distribution range. *Folia Zool.* **65**, 142–147 (2016).
17. Montgelard, C., Bentz, S., Tirard, C., Verneau, O. & Catzeflis, F. M. Molecular Systematics of Sciurognathi (Rodentia): The Mitochondrial Cytochrome b and 12S rRNA Genes Support the Anomaluroidea (Pedetidae and Anomaluridae). *Mol. Phylogenet. Evol.* **22**, 220–233 (2002).
18. Çolak, R. *et al.* *Türkiye’de Yayılış Gösteren Allactaga (Mammalia: Rodentia) Türlerinin Taksonomisi ve Filogenisi.* (2018).
19. Kryštufek, B. *et al.* Mitochondrial sequences point on a cryptic species in five-toed jerboas, subgenus *Paralactaga*. *Mammalia* **77**, (2013).
20. Shenbrot, G. *et al.* A new recent genus and species of three-toed jerboas (Rodentia: Dipodinae) from China: A living fossil? *J. Zool. Syst. Evol. Res.* **55**, 356–368 (2017).
21. Lebedev, V. S. *et al.* Phylogeographical study reveals high genetic diversity in a widespread desert rodent, *Dipus sagitta* (Dipodidae: Rodentia). *Biol. J. Linn. Soc.* **123**, 445–462 (2018).
22. Boratynski, Z., Brito, J. C. & Mappes, T. The origin of two cryptic species of African desert jerboas (Dipodidae: *Jaculus*). *Biol. J. Linn. Soc.* **105**, 435–445 (2012).
23. Luo, G., Ding, L. & Liao, J. The complete mitochondrial genome of *Stylodipus*

telum (Rodentia: Dipodidae) and its phylogenetic analysis. *Mitochondrial DNA Part A* **27**, 2568–2569 (2016).

24. Sambrook, J., Fritsch, E. F. & Maniatis, T. *Molecular cloning: a laboratory manual*. (Cold Spring Harbor, 1989).
25. Lebedev, V. S. *et al.* Phylogeny and evolutionary history of birch mice *Sicista Griffithi*, 1827 (Sminthidae, Rodentia): Implications from a multigene study. *J. Zool. Syst. Evol. Res.* jzs.12279 (2019) doi:10.1111/jzs.12279.
26. Yang, D. Y., Eng, B., Wayne, J. S., Dudar, J. C. & Saunders, S. R. Improved DNA extraction from ancient bones using silica-based spin columns. *Am. J. Phys. Anthropol.* **105**, 539–543 (1998).
27. Hall, T. A. BioEdit: a user-friendly biological sequence alignment editor and analysis program for Windows 95/98/NT. *Nucleic Acids Symp. Ser.* **41**, 95–98 (1999).
28. Swofford, D. L. PAUP\*: Phylogenetic analysis using parsimony (\* and other methods), version 40b10. (2003).
29. Nguyen, L.-T., Schmidt, H. A., von Haeseler, A. & Minh, B. Q. IQ-TREE: A Fast and Effective Stochastic Algorithm for Estimating Maximum-Likelihood Phylogenies. *Mol. Biol. Evol.* **32**, 268–274 (2015).
30. Kalyaanamoorthy, S., Minh, B. Q., Wong, T. K. F., von Haeseler, A. & Jermin, L. S. ModelFinder: fast model selection for accurate phylogenetic estimates. *Nat. Methods* **14**, 587–589 (2017).
31. Minh, B. Q., Nguyen, M. A. T. & von Haeseler, A. Ultrafast approximation for phylogenetic bootstrap. *Mol. Biol. Evol.* **30**, 1188–1195 (2013).
32. Guindon, S. *et al.* New algorithms and methods to estimate maximum-likelihood phylogenies: assessing the performance of PhyML 3.0. *Syst. Biol.* **59**, 307–321 (2010).
33. Ronquist, F. *et al.* MrBayes 3.2: efficient bayesian phylogenetic inference and model choice across a large model space. *Syst. Biol.* **61**, 539–542 (2012).
34. Rambaut, A., Drummond, A. J., Xie, D., Baele, G. & Suchard, M. A. Posterior summarization in Bayesian phylogenetics using Tracer 1.7. *Syst. Biol.* **67**, 901–904 (2018).

35. Kumar, S. & Gadagkar, S. R. Disparity Index: a simple statistic to measure and test the homogeneity of substitution patterns between molecular sequences. *Genetics* **158**, 1321–1327 (2001).
36. Tamura, K., Dudley, J., Nei, M. & Kumar, S. MEGA4: Molecular Evolutionary Genetics Analysis (MEGA) Software Version 4.0. *Mol. Biol. Evol.* **24**, 1596–1599 (2007).
37. Heled, J. & Drummond, A. J. Bayesian inference of species trees from multilocus data. *Mol. Biol. Evol.* **27**, 570–580 (2010).
38. Stephens, M., Smith, N. J. & Donnelly, P. A new statistical method for haplotype reconstruction from population data. *Am. J. Hum. Genet.* **68**, 978–989 (2001).
39. Librado, P. & Rozas, J. DnaSP v5: a software for comprehensive analysis of DNA polymorphism data. *Bioinformatics* **25**, 1451–1452 (2009).
40. Mirarab, S. *et al.* ASTRAL: genome-scale coalescent-based species tree estimation. *Bioinformatics* **30**, i541–i548 (2014).
41. Fujisawa, T. & Barraclough, T. G. Delimiting species using single-locus data and the generalized mixed uule coalescent approach: a revised method and evaluation on simulated data sets. *Syst. Biol.* **62**, 707–724 (2013).
42. Marshall, C. R. A simple method for bracketing absolute divergence times on molecular phylogenies using multiple fossil calibration points. *The American Naturalist*, **171**, 726–742 (2008).
43. Solow, A. R. Estimation of stratigraphic ranges when fossil finds are not randomly distributed. *Paleobiology* **29**, 181–185 (2003).
44. Marshall, C. R. Using confidence intervals to quantify the uncertainty in the end-points of stratigraphic ranges. *Paleontol. Soc. Pap.* **16**, 291–316 (2010).
45. Qiu, Z.D., Wang, X.M. & Li, Q. Faunal succession and biochronology of the Miocene through Pliocene in Nei Mongol (Inner Mongolia). *Vertebrata PalAsiatica* **44**, 165–181 (2006).
46. Li, Q. & Zheng, S. H. Note on four species of dipodids (Dipodidae, Rodentia) from the Late Miocene Bahe Formation, Lantian, Shaanxi. *Vertebrata PalAsiatica* **43**, 283–296 (in Chinese with English summary) (2005).
47. Zazhigin, V. S. & Lopatin, A. V. Evolution, phylogeny, and classification of

- Dipodoidea. in *Systematics and Phylogeny of the Rodents and Lagomorphs* (eds. Agadzhanyan, A. K. & Orlov, V. N.) 50–52 (KMK (in Russian), 2000).
48. Tjatkova, L. A. & Kaipova, G. O. Late Pliocene and Eopleistocene micromammal faunas of southeastern Kazakhstan. *Acta Zool. Cracoviensia* **39**, 546–557 (1996).
  49. Devyatkin, E. V. *et al.* *Late Cenozoic of Mongolia (Stratigraphy and Paleogeography)*. (Nauka Press (in Russian), 1989).
  50. Sukhov, V. P. *Late Pliocene Small Mammals from Akkulaevo Localitiy in Bashkiria*. (Nauka Press (in Russian), 1970).
  51. Elith, J. *et al.* A statistical explanation of MaxEnt for ecologists. *Divers. Distrib.* **17**, 43–57 (2011).
  52. Elith, J. *et al.* Novel methods improve prediction of species' distributions from occurrence data. *Ecography*. **29**, 129–151 (2006).
  53. Michaux, J. & Shenbrot, G. Family Dipodidae (Jerboas). in *Handbook of the mammals of the world, 7. Rodents II* (eds. Wilson, D. E., Lacher, T. E. & Mittermeier, R. A.) 62–100 (Lynx Edicions in association with Conservation International and IUCN, 2017).
  54. Holden, M. E. & Musser, G. G. Family Dipodidae. in *Mammal Species of the World. A Taxonomic and Geographic Reference* (eds. Wilson, D. E. & Reeder, D. M.) 871–893 (Johns Hopkins University Press, 2005).
  55. Shenbrot, G. I. *et al.* *Mammals of the Fauna of Russia and Contiguous Countries. Dipodoid Rodents*. (Nauka Press (in Russian), 1995).
  56. Ognev, S. I. *Mammals of the USSR and adjacent countries: Rodents (continued). Mammals of eastern Europe and northern Asia*. (Akademiya Nauk SSSR (in Russian), 1948).
  57. Vinogradov, B. S. *Fauna of the USSR; Mammals, vol. 3, pt. 4. Jerboas*. (Academy Nauk SSSR Publishing House (in Russian), 1937).
